# Design principles of collateral sensitivity-based dosing strategies

Linda B. S. Aulin<sup>1\*</sup>, Apostolos Liakopoulos<sup>2</sup>, Piet H. van der Graaf<sup>1,3</sup>, Daniel E. Rozen<sup>2</sup>, J. G. Coen van Hasselt<sup>1\*</sup>

1. Leiden Academic Centre for Drug Research, Leiden University, Leiden, The Netherlands

2. Institute of Biology, Leiden University, Leiden, The Netherlands

3. Certara, Canterbury, United Kingdom

\*Corresponding authors:

Linda Aulin, [l.b.s.aulin@lacdr.leidenuniv.nl](mailto:l.b.s.aulin@lacdr.leidenuniv.nl), Leiden University, Einsteinweg 55, 2333 CC, Leiden, The Netherlands

Coen van Hasselt, [coen.vanhasselt@lacdr.leidenuniv.nl](mailto:coen.vanhasselt@lacdr.leidenuniv.nl), Leiden University, Einsteinweg 55, 2333 CC, Leiden, The Netherlands

Abstract: 148/150

Manuscript: 5064/5000

Figures: 10

Tables: 2

References: 39

Supplemental material: 5 Figures

Keywords: collateral sensitivity, pharmacodynamics, antimicrobial resistance

## 26 Abstract

27 Collateral sensitivity (CS)-based antibiotic treatments, where increased antibiotic resistance to one antibiotic leads to  
28 increased antibiotic sensitivity of second antibiotic, could constitute a strategy to limit emergence of antibiotic  
29 resistance. However, it is unclear how to design CS-based dosing schedules that effectively suppress resistance. Here,  
30 we use a mathematical modelling approach incorporating pharmacokinetic and pharmacodynamic features to  
31 simulate bacterial population dynamics for different combination treatment designs. We study how differences in  
32 pathogen- and drug-specific factors influence the probability of resistance at end of treatment for different dosing  
33 strategies. We show that drug administration sequence is critical, whilst surprisingly, reciprocal CS was not essential  
34 to suppress resistance. Overall, we find that one-day cycling or simultaneous treatment schedules were most effective  
35 to suppress the probability of resistance. In conclusion, our analysis provides insight into key design principles that  
36 contribute to the success of CS-based treatment strategies in suppressing resistance.

## 37 38 Funding

39 This work is funded by ZonMW Off Road (Project number 451001033) and NWA Idea Generator (Project number  
40 NWA.1228.192.140). AL and DER were supported through the JPI-EC-AMR (Project 547001002).

## 44 Introduction

45 Antimicrobial resistance (AMR) is a worldwide health threat due to the reduction of clinically effective antibiotics.  
46 Current drug discovery pipelines of new-in-class antibiotic agents are insufficient to offset the emergence of new  
47 AMR[1]. Innovative strategies to reduce the rate that AMR develops are thus critically needed. Treatment with  
48 antibiotics in individual patients represents one important situation where *de novo* AMR may emerge[2,3]. However,  
49 antibiotic dosing strategies used in the clinic do not typically explicitly consider within-host emergence of AMR.  
50 Instead, current clinical strategies are primarily based on exposure targets that are associated with sufficient bacterial  
51 kill in preclinical studies, or with clinical outcomes in patient studies[4]. Thus, there is need for clinical dosing strategies  
52 designed to suppress emergence of AMR[5].

53 Selection inversion mechanisms that exploit evolutionary trade-offs associated with AMR are of increasing interest to  
54 design antibiotic dosing strategies that suppress the within-host emergence of AMR [6]. In this context, collateral  
55 sensitivity (CS), where resistance to one antibiotic leads to increased sensitivity to a second antibiotic, has been  
56 proposed as a potential strategy to suppress AMR [7,8]. CS has been extensively characterized *in vitro*, typically by  
57 evolving AMR strains and then quantifying correlated changes in the sensitivity to other antibiotics[9–12]. CS effects  
58 have been characterized for several clinically relevant pathogens, including *Escherichia coli*[9,13], *Pseudomonas*  
59 *aeruginosa*[14], *Enterococcus faecalis*[13], *Streptococcus pneumoniae*[15], and *Staphylococcus aureus*[16]. CS  
60 relationships between antibiotics can either be one directional, where decreased sensitivity to one antibiotic show CS  
61 to a second antibiotic but not the reverse, or reciprocal, where decreased sensitivity either of the antibiotics results in  
62 CS to the other. Reciprocal CS is often considered a prerequisite for effective CS-based treatments, but such  
63 relationships have been less frequently observed compared to one directional CS[9–16].

64 CS-based treatment strategies can use different designs to combine antibiotics showing a CS-relationship, including  
65 simultaneous, sequential, or cyclic (alternating) administration. For example, consider a cycling drug strategy using  
66 two antibiotics showing reciprocal CS (**Figure 1**). Initial treatment would start with antibiotic A. This leads to resistance  
67 to A and a corresponding increase in sensitivity to B. When treatment is switched to antibiotic B, the inverted selection  
68 pressure leads to the eradication of cells that are resistant to antibiotic A (due to CS), but possibly favouring any  
69 remaining cells that are resistant to B, but susceptible to antibiotic A. . By cycling between the two drugs to sequentially  
70 eliminate all cells that show reciprocal CS, complete eradication can be achieved. Although the conceptual strategies  
71 of CS-based treatments have been discussed[6], it remains unclear when CS-based dosing strategies are most likely to  
72 be beneficial, and how to design specific antibiotic dosing (combination) schedules based on CS. Furthermore, it is  
73 unclear how pathogen-specific factors, such as CS effect magnitude and directionality, fitness costs of resistance, and  
74 mutation rates, as well as pharmacological factors related to pharmacokinetics (PK) and pharmacodynamics (PD) for  
75 different drug types, can affect optimal dosing schedules.

76 Experimental studies *in vitro* are essential to characterize the incidence, evolvability and magnitude of CS, all of which  
77 are important but isolated components that may contribute to the success of CS-based treatments [9–16]. However,  
78 for translation of *in vitro* CS findings to *in vivo* or clinical treatment scenarios, consideration of pharmacodynamic (PD)

79 and pharmacokinetic (PK) factors is essential, as these determine the differential impact of different antibiotics on the  
80 rate and concentration dependent effects of bacterial growth, inhibition, and killing [17,18]. By affecting bacterial  
81 dynamics, antibiotic PK-PD can have a profound influence on resistance evolution, and are therefore key factors to  
82 design optimised CS-informed treatments. To this end, mathematical models are important tools to integrate multiple  
83 biological and pharmacological factors contributing to treatment outcomes, including different PK parameters of  
84 specific antibiotics in patients, antibiotic-specific PD parameters, and pathogen specific characteristics such as strain  
85 fitness and the rate and magnitude of CS effects.

86 In the current study we aim to determine if and when CS-based dosing schedules are likely to lead to the suppression  
87 of within-host emergence of antibiotic resistance. We utilise a mathematical modelling approach to comprehensively  
88 study the influence of key pathogen-specific factors and the contribution of PK and PD properties to identify key design  
89 principles to inform rational design of antibiotic combination dosing schedules that suppress antibiotic resistance.

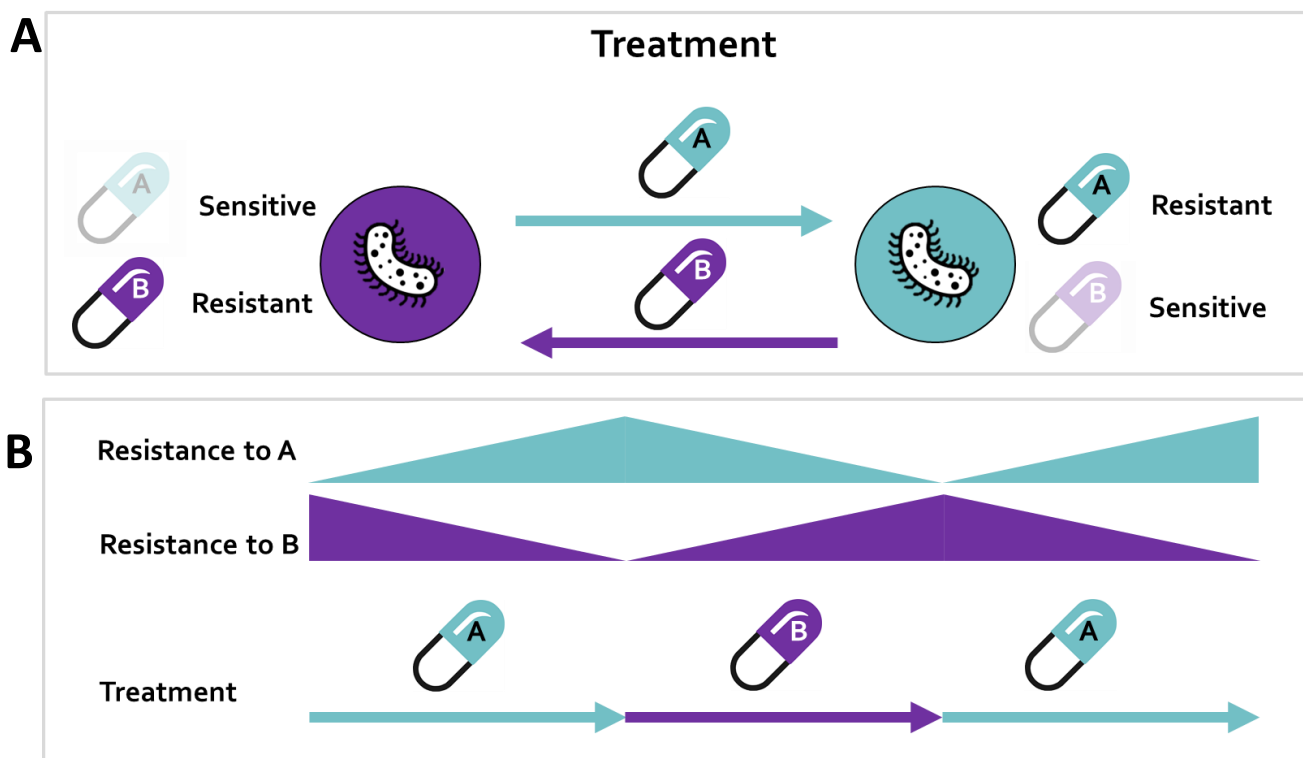

92 **Figure 1. Concept of collateral sensitivity (CS)-based treatments using two hypothetical drugs, antibiotic A and B. Adapted from Pál et al 2015**  
93 [19] **A:** Reciprocal CS relationship between antibiotic A and B. **B:** Theoretical cycling regimen exploiting CS between antibiotic A and B to suppress  
94 resistance.

## 95 Methods

### 96 Model framework

97 A differential-equation based model of components accounting for antibiotic PK and PD, and associated bacterial  
98 population dynamics, to study the impact of differences in pathogen- and drug-specific characteristics for different  
99 treatment strategies for treatment with two antibiotics (AB) referred to as antibiotic A ( $AB_A$ ) and antibiotic B ( $AB_B$ ).

### 100 *Pharmacokinetics*

101 A mono-exponential PK model was defined for both antibiotics  $AB_i$ , where  $i = \{A,B\}$ , as follows:

$$102 \frac{dA_{AB_i}}{dt} = -k_{e,AB_i} \times A_{AB_i} \quad (1)$$

$$103 t_{half,AB_i} = \frac{\ln(2)}{k_{e,AB_i}} \quad (2)$$

$$104 C_{AB_i} = \frac{A_{AB_i}}{V_{AB_i}} \quad (3)$$

105 where **Equation 1** describes the change of the amount of  $AB_i$  over time after intravenous administration,  $k_{e,AB_i}$  is the  
 106 elimination rate of  $AB_i$ , which can also be expressed as a half-life ( $t_{half,AB_i}$ ) (**Equation 2**). The plasma concentration  
 107 ( $C_{AB_i}$ ), which is the assumed driver of the antibiotic effect, is calculated using the  $V_{AB_i}$ , the distribution volume of  $AB_i$ ,  
 108 (**Equation 3**).

### 109 **Bacterial subpopulations**

110 A model for antibiotic sensitive and resistant subpopulations was defined, comprising of a four-state stochastic hybrid  
 111 ordinary differential equation (ODE) model, where each state represents a bacterial subpopulation with different  
 112 antibiotic susceptibility towards  $AB_A$  and  $AB_B$ .

113 The model included an antibiotic sensitive bacterial subpopulation (WT) (**Equation 4**), one mutant subpopulation  
 114 resistant to  $AB_A$  but sensitive to  $AB_B$  ( $R_A$ ) (**Equation 5**), one mutant subpopulation sensitive to  $AB_A$  but resistant to  $AB_B$   
 115 ( $R_B$ ) (**Equation 6**), and one double mutant subpopulation resistant to both  $AB_A$  and  $AB_B$  ( $R_{AB}$ ) (**Equation 7**). The initial  
 116 bacterial population was assumed to be homogeneous and in the sensitive WT state unless stated otherwise.

$$117 \frac{dWT}{dt} = WT \times k_{net,WT}(WT, R_A, R_B, R_{AB}, F_{fit}, n_{WT}) \times E_{AB,WT}(E_{AB_A,WT}, E_{AB_B,WT}) - k_{WT,R_A}(WT, \mu) - k_{WT,R_B}(WT, \mu) \quad (4)$$

$$118 \frac{dR_A}{dt} = R_A \times k_{net,R_A}(WT, R_A, R_B, R_{AB}, F_{fit}, n_{R_A}) \times E_{AB,R_A}(E_{AB_A,R_A}, E_{AB_B,R_A}) + k_{WT,R_A}(WT, \mu) - k_{R_A,R_{AB}}(R_A, \mu) \quad (5)$$

$$119 \frac{dR_B}{dt} = R_B \times k_{net,R_B}(WT, R_A, R_B, R_{AB}, F_{fit}, n_{R_B}) \times E_{AB,R_B}(E_{AB_A,R_B}, E_{AB_B,R_B}) + k_{WT,R_B}(WT, \mu) - k_{R_B,R_{AB}}(R_B, \mu) \quad (6)$$

$$120 \frac{dR_{AB}}{dt} = R_{AB} \times k_{net,R_{AB}}(WT, R_A, R_B, R_{AB}, F_{fit}, n_{R_{AB}}) \times E_{AB,R_{AB}}(E_{AB_A,R_{AB}}, E_{AB_B,R_{AB}}) + k_{R_A,R_{AB}}(R_A, \mu) + k_{R_B,R_{AB}}(R_B, \mu) \quad (7)$$

121 The above equations (**Equation 4-7**) describe the subpopulation specific rate of change for bacterial density, which is  
 122 dependent on the bacterial density of subpopulation  $z$ , subpopulation specific net growth ( $k_{net,z}$ ), antibiotic effect  
 123 ( $E_{AB,z}$ ), and mutation transition(s) ( $k_{z,M}$ ) if present.

### 124 **Resistance mutation**

125 Resistance evolution was included as stochastic mutation process. This process was modelled using a binomial  
 126 distribution  $B$  with a mutation probability equal to the mutation rate ( $\mu$ ). The number of bacteria mutated per time  
 127 step  $k_{z,M}$  depends on the number of bacteria available for mutation ( $n_z$ ), *i.e.* the bacterial subpopulation density of  
 128 subpopulation  $z$  multiplied by the infection volume  $V$ , for mutation at time  $t$  (**Equation 8**). Double resistant mutants  
 129 evolved through two mutation steps.

$$k_{z,M} = \frac{B(n_z, \mu)}{V} \quad (8)$$

### 131 **Pharmacodynamic effects**

132 Drug effects on bacterial subpopulations (**Equation 4-7**) were assumed to be additive and the total drug effect for each  
 133 subpopulation  $z$  ( $E_{AB,z}$ ), and was implemented as follows (**Equation 9**):

$$134 \quad E_{AB,z} = 1 - (E_{AB_A,z}(C_{AB,A}, G_{min, AB_A}, Hill_{AB_A}, MIC_{AB_A, z}) + E_{AB_B,z}(C_{AB,B}, G_{min, AB_B}, Hill_{AB_B}, MIC_{AB_B, z})) \quad \text{Equation 9}$$

135 Here, antibiotic-mediated effects were implemented according to a previously developed PD model [17], where the  
 136 effect of the  $i^{\text{th}}$  antibiotic on bacterial subpopulation  $z$  ( $E_{AB_i,z}$ ) related to the unbound antibiotic concentration ( $C_{AB,i}$ )  
 137 according to Equation 10.

$$138 \quad E_{AB_i,z} = \frac{(G_{max} - G_{min, AB_i}) \times \left( \frac{C_{AB,i}}{MIC_{AB_i,z}} \right)^{Hill_{AB_i}}}{\left( \frac{C_{AB_i}}{MIC_{AB_i,z}} \right)^{Hill_{AB_i}} + \frac{G_{min, AB_i}}{G_{max}}} \quad \text{Equation 10}$$

139 where  $G_{max} = 1$ ,  $G_{min, AB_i}$  representing the maximal killing effect for the  $AB_i$ ,  $Hill_{AB_i}$  being the shape factor of the  
 140 concentration-effect relationship, and  $MIC_{AB_i,z}$  being the subpopulation-specific MIC of  $AB_i$ .

141 Subpopulation-specific MIC for  $AB_i$  was defined according to **Equation 11**. Sensitive bacteria were defined as having a  
 142 MIC of 1 mg/L ( $MIC_{WT}$ ) and resistant as 10 mg/L ( $MIC_R$ ). Because the antibiotic concentrations are expressed as folds  
 143 times  $MIC_{WT}$ , the absolute value of  $MIC_{WT}$  is irrelevant. However, the ratio between  $MIC_{WT}$  and  $MIC_R$  is of relevance. A  
 144 tenfold increase was chosen to represent a significant increase for a biologically plausible scenario. Resistance-related  
 145 CS effects were included on the two singly resistant mutants ( $R_A$  and  $R_B$ ), and were implemented as a proportional  
 146 reduction ( $CS_A$  and  $CS_B$ ) of the sensitive MIC ( $MIC_{WT}$ ). The subpopulation- and antibiotic-specific MICs are stated below:

$$147 \quad MIC_{AB_A, WT} = MIC_{WT} \quad \text{and} \quad MIC_{AB_B, WT} = MIC_{WT}$$

$$148 \quad MIC_{AB_A, R_A} = MIC_R \quad \text{and} \quad MIC_{AB_B, R_A} = MIC_{WT} \times CS_B$$

$$149 \quad MIC_{AB_A, R_B} = MIC_{WT} \times CS_A \quad \text{and} \quad MIC_{AB_B, R_B} = MIC_R$$

$$150 \quad MIC_{AB_A, R_{AB}} = MIC_R \quad \text{and} \quad MIC_{AB_B, R_{AB}} = MIC_R$$

### 151 **Fitness effects**

152 We considered resistance-associated fitness cost by including a fitness cost factor ( $F_{fit}$ ), which introduced a fractional  
 153 reduction of the growth rate ( $k_G$ ) for each resistance mutation. The net growth rate was implemented according to  
 154 **Equation 12**.

$$155 \quad k_{net,z} = k_G \times \left( 1 - \frac{WT + R_A + R_B + R_{AB}}{B_{max}} \right) \times F_{fit}^{n_z} \quad \text{Equation 12}$$

156 where  $k_{net,z}$  is the subpopulation specific net growth in the absents of antibiotic,  $B_{max}$  is the systems maximal carrying  
 157 capacity, and  $n_z$  is the subpopulation specific number of mutations ( $n_z = 0, 1$  or  $2$ ).

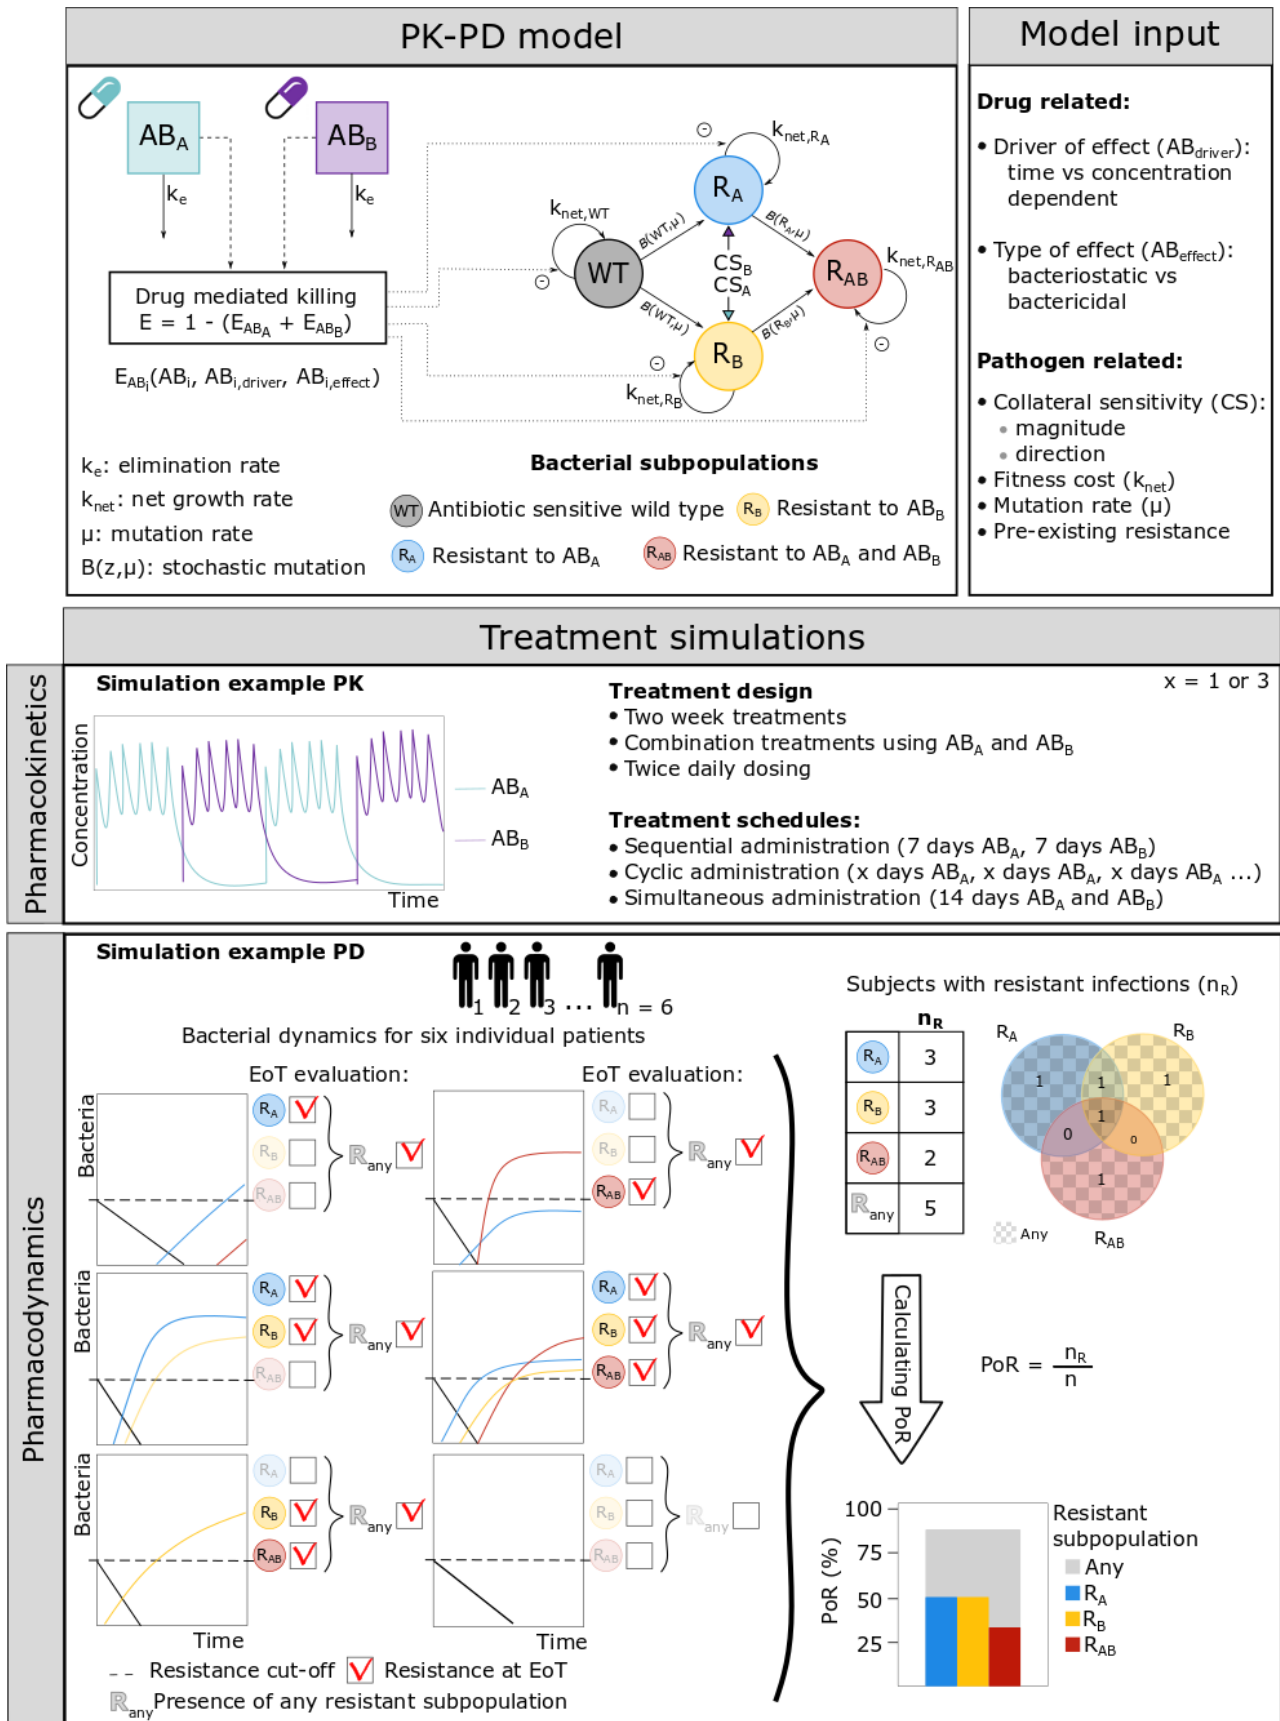

158

159 **Figure 2. Simulation workflow.** Pharmacokinetic-pharmacodynamic (PK-PD) framework comprising of four bacterial subpopulations (WT,  $R_A$ ,  $R_B$ ,  
 160  $R_{AB}$ ) and PK-PD of two hypothetical antibiotics ( $AB_A$  and  $AB_B$ ). The framework includes fixed infection- and pathogen-specific parameters and  
 161 fixed drug PK parameters. The model input includes both drug and pathogen related factors, which vary between different scenarios. The  
 162 framework was used to simulate different treatment schedules of two week combination treatments using  $AB_A$  and  $AB_B$  for  $n$  patients. In the  
 163 simulation example a three-day cycling treatment regimen (PK panel) is simulated for six patients. The resulting patient specific bacterial profiles  
 164 are shown in the PD panel. Resistance was evaluated for each patient and bacterial subpopulation at the end of treatment (EoT), for which the  
 165 corresponding probability of resistance (PoR) was calculated.

166 Pathogen- and infection-specific parameters

167 The infection-specific parameters were chosen to represent a human bacteraemia, thus a typical human blood volume  
 168 of five litre was used as the infection site volume[20]. An initial bacterial density of  $10^4$  colony forming units (CFU)/mL  
 169 was used to represent a severe infection, which reflects an early stage of an established infection[21]. A system  
 170 carrying capacity limitation ( $B_{max}$ ) of  $10^8$  CFU/mL[21] was implemented according to Equation 12. When the maximal  
 171 carrying capacity is reached, the net growth of the total bacterial population is zero, resulting in a stationary phase.  
 172 During this phase bacterial replication continues, but is offset by bacterial death at the same rate, thereby still allowing  
 173 for resistance mutations to occur. Resistance mutation rates of  $10^{-6}$  and  $10^{-9}$  mutations/base pair/hour were chosen  
 174 to represent a high and a moderate mutation rate scenario, respectively[22].

175 **Table 1. Pathogen-, infection-, and drug-specific model parameters used in the simulations.**

| Parameter                                    | Value                 | Unit     | Scenario                                            | Reference    |
|----------------------------------------------|-----------------------|----------|-----------------------------------------------------|--------------|
| <i>Pathogen-specific</i>                     |                       |          |                                                     | 177          |
| Maximal growth rate ( $k_G$ )                | 0.7                   | $h^{-1}$ | Doubling time of 1 h                                | - 178        |
| Mutation rate ( $\mu$ )                      | $10^{-6}$ - $10^{-9}$ | mut/bp/h | High to moderate mutation rates                     | - 179        |
| <i>Infection-specific</i>                    |                       |          |                                                     | 180          |
| Starting bacterial density ( $B_0$ )         | $10^4$                | cfu/ml   | <i>In vivo</i> bacteraemia day one                  | [21] 181     |
| Maximal carrying capacity ( $B_{max}$ )      | $10^8$                | cfu/ml   | <i>In vivo</i> experiment after 4 days              | [21] 182     |
| Infection site volume ( $V$ )                | 5                     | L        | Total blood volume                                  | [20] 183     |
| <i>Drug-specific</i>                         |                       |          |                                                     | 184          |
| Distribution volume of $AB_i$ ( $V_{AB_i}$ ) | 1                     | L        | Facilitates conversion from amount to concentration | - 185<br>186 |
| Half-life of $AB_i$ ( $t_{half, AB_i}$ )     | 5                     | h        | Clinically relevant short half-life                 | - 187        |

188

189 Drug-specific parameters

190 The two hypothetical antibiotics used for the simulations ( $AB_A$  and  $AB_B$ ) have identical one-compartmental PK with  
 191 distribution volumes of one litre, five-hour half-lives (Table 1), and no protein binding. The selected half-life represents  
 192 antibiotics with clinically relevant short half-lives, thereby rapidly reaching steady-state concentrations with minimal  
 193 accumulation. The drugs were administrated as intravenous bolus doses twice daily over a treatment duration of two  
 194 weeks. Several different dosing regimens were simulated including monotherapy, sequential dosing, cycling regimens,  
 195 and simultaneous dosing. For sequential and cycling treatments  $AB_A$  was used as the starting drug. The doses used  
 196 were obtained by calculating the required dose to achieve appropriate average steady state concentration ( $C_{ss}$ ) relative  
 197 to the  $MIC_{WT}$ . The lowest dose that gave kill or stasis of the WT bacteria within the 24 hours of treatment, but allowed  
 198 for resistance development during monotherapy, was selected for all dosing regimens except for the simultaneous  
 199 dosing, for which the dose for the individual antibiotics were reduced by half. Four different PD types were included  
 200 using different combinations of parameter values of Hill (driver of antibiotic effect) and  $G_{min}$  (type of antibiotic effect),  
 201 and represented 1) time-dependent (Hill = 0.5) or concentration-dependent (Hill = 3) and 2) bacteriostatic ( $G_{min} = -1$ )



202 or bactericidal ( $G_{\min} = -3$ ) antibiotics. The corresponding PK-PD relationship of the four different antibiotic types is  
 203 shown in **Figure 3**.

204

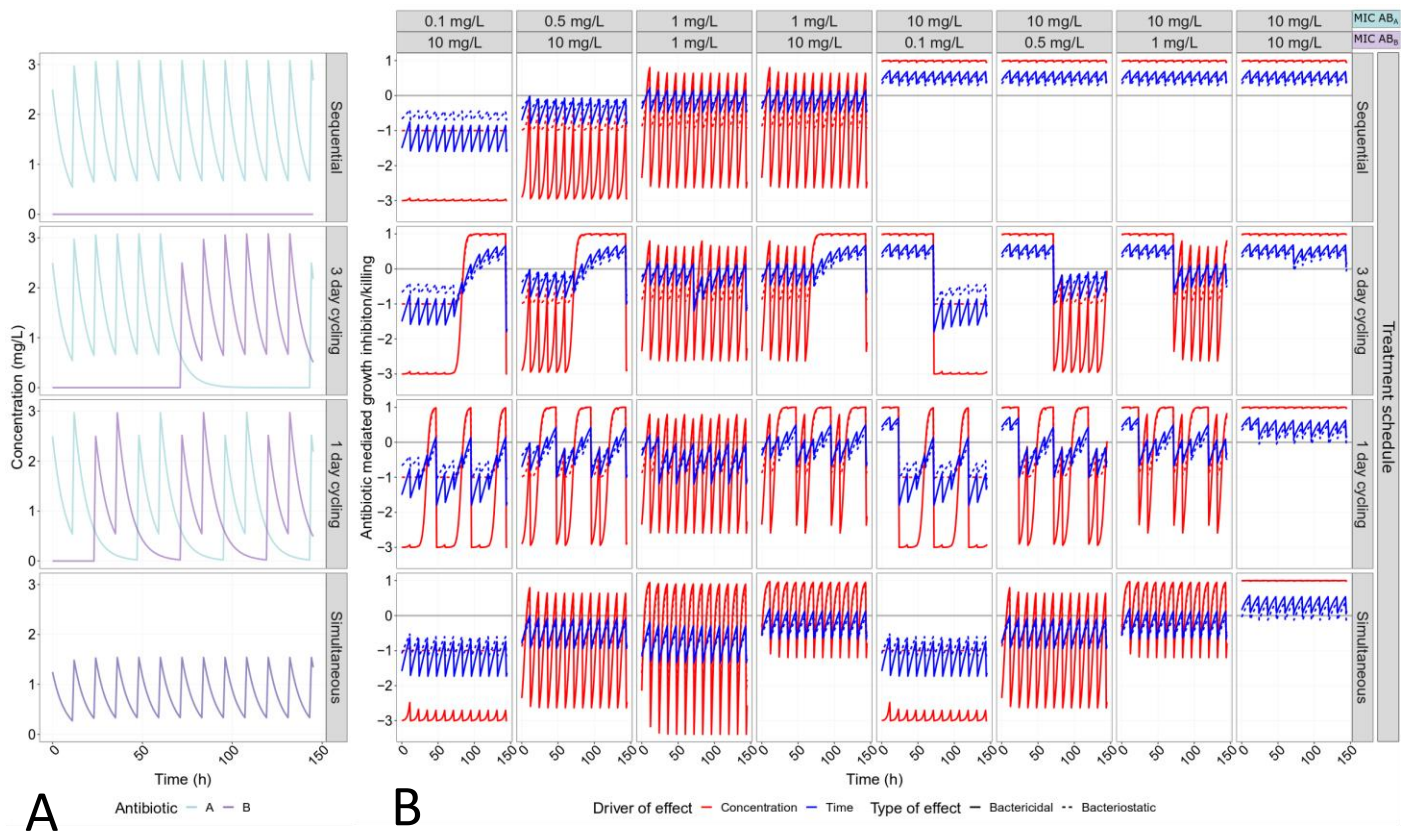

205

206 **Figure 3. MIC-specific PK-PD relationships.** A: Initial pharmacokinetic (PK) profiles of mono or combination treatments using two hypothetical  
 207 antibiotics AB<sub>A</sub> (turquoise) and AB<sub>B</sub> (purple), administrated twice daily, with a dose resulting in  $C_{ss}$  of 1.5 mg/L or 0.75mg/L for simultaneous  
 208 dosing. B: MIC-specific pharmacodynamic profiles concentration effect relationship of different antibiotic drug types including concentration-  
 209 (Hill = 3, red) or time- (Hill = 0.5, blue) dependent antibiotics and bactericidal ( $G_{\min} = -3$ , solid) and bacteriostatic ( $G_{\min} = -1$ , dashed), where the  
 210 effect is representing the proportional bacterial growth inhibition/killing. The effect is driven by the PK profile shown in panel A according to  
 211 Equation 9 and 10.

212 Simulations scenarios

213 An initial set of dose finding simulations revealed that monotherapy required  $C_{ss}$  equal to 1.5 x  $MIC_{WT}$  to achieve killing  
 214 of the WT, regardless of the drug type used (**Figure S1**). This  $C_{ss}$  was subsequently used for treatment scenarios unless  
 215 explicitly stated otherwise.

216 We used a systematic simulation strategy to study the impact of CS, fitness cost, initial subpopulation heterogeneity  
 217 in antibiotic sensitivity, and mutation rate on the probability of resistance (PoR) development for different treatments.  
 218 An overview of all simulated scenarios can be found in **Table 2**. We simulated treatments using two same-type  
 219 antibiotics for scenarios without CS as well as in the presence of one directional and reciprocal CS in the magnitude of  
 220 50% or 90% reduction of the sensitive MIC (**Table 2, Scenario 1 and 2**). For these scenarios the resistance was assumed  
 221 to occur without any fitness cost, thus allowing us to evaluated CS-specific effect on PoR. We also simulated a set of  
 222 treatment scenarios using two different antibiotic type in the presence or absence of CS (**Table 2, Scenario 3**).  
 223 Additionally, we simulated same-type treatment scenarios covering a wide range of fitness costs (10% to 50% per  
 224 mutation) implemented as a growth rate reduction (**Table 2, Scenario 4**). To assess the impact of therapeutic window  
 225 of antibiotics, as reflected by the fold-difference of steady state concentration ( $C_{ss}$ ) to the  $MIC_{WT}$ , we simulated

226 different dosing levels resulting in a range of  $C_{ss}$  of 0.5-5 x  $MIC_{WT}$  (**Table 2, Scenario 5**). In order to better understand  
 227 the interplay between CS and fitness cost we simulated these scenarios with and without CS. We further investigated  
 228 how low levels of pre-existing resistance (1%) towards either  $AB_A$  or  $AB_B$  affected the PoR at the end of treatment for  
 229 different dosing regimens (**Table 2, Scenario 6**). Finally, we examined the effect of increased mutation rates on  
 230 resistance development (**Table 2, Scenario 7**).

231 Each simulated scenario was realized 500 times (n), thus representing 500 virtual patients.

232

233 **Table 2. Simulation scenarios evaluated and associated pathogen- and pharmacological factors studied**

| Scenario                          | Pathogen factors                                   |                               |                                                  |                           | Treatment factors                                                                                         |                             |
|-----------------------------------|----------------------------------------------------|-------------------------------|--------------------------------------------------|---------------------------|-----------------------------------------------------------------------------------------------------------|-----------------------------|
|                                   | Collateral sensitivity (%)                         | Fitness cost per mutation (%) | Mutation rate (mut/bp/h)                         | Pre-existing resistance   | PD parameters                                                                                             | Steady state concentration* |
| <b>1: Treatment design</b>        | Symmetric reciprocal: 50 or 90                     | No                            | $10^{-9}$                                        | No                        | Same-type combinations:<br>$G_{min,AB_A} = G_{min,AB_B}$<br>and<br>$Hill_{AB_A} = Hill_{AB_B}$            | 1.5x $MIC_{WT}$             |
| <b>2: Directionality of CS</b>    | One directional or asymmetric reciprocal: 50 or 90 | No                            | $10^{-9}$                                        | No                        | Same-type combinations:<br>$G_{min,AB_A} = G_{min,AB_B}$<br>and<br>$Hill_{AB_A} = Hill_{AB_B}$            | 1.5x $MIC_{WT}$             |
| <b>3: Drug sequence</b>           | Symmetric reciprocal: 50 or 90                     | No                            | $10^{-9}$                                        | No                        | Different types combined:<br>$G_{min,AB_A} \neq G_{min,AB_B}$<br>and/or<br>$Hill_{AB_A} \neq Hill_{AB_B}$ | 1.5x $MIC_{WT}$             |
| <b>4: Fitness cost</b>            | Symmetric reciprocal: 50 or 90                     | Yes: 10, 20, 30, 40, or 50    | $10^{-9}$                                        | No                        | Same-type combinations:<br>$G_{min,AB_A} = G_{min,AB_B}$<br>and<br>$Hill_{AB_A} = Hill_{AB_B}$            | 1.5x $MIC_{WT}$             |
| <b>5: Therapeutic window</b>      | Symmetric reciprocal: 50 or 90                     | No                            | $10^{-9}$                                        | No                        | Same-type combinations:<br>$G_{min,AB_A} = G_{min,AB_B}$<br>and<br>$Hill_{AB_A} = Hill_{AB_B}$            | 0.5-5x $MIC_{WT}$           |
| <b>6: Pre-existing resistance</b> | Symmetric reciprocal: 50 or 90                     | No                            | $10^{-9}$                                        | Yes: 1% $R_A$ or 1% $R_B$ | Same-type combinations:<br>$G_{min,AB_A} = G_{min,AB_B}$<br>and<br>$Hill_{AB_A} = Hill_{AB_B}$            | 1.5x $MIC_{WT}$             |
| <b>7: Mutation rate</b>           | Symmetric reciprocal: 50 or 90                     | No                            | $10^{-9}$ , $10^{-8}$ , $10^{-7}$ , or $10^{-6}$ | No                        | Same-type combinations:<br>$G_{min,AB_A} = G_{min,AB_B}$<br>and<br>$Hill_{AB_A} = Hill_{AB_B}$            | 1.5x $MIC_{WT}$             |

234 CS=Collateral sensitivity; PD=Pharmacodynamics;  $G_{\min,ABi}$  = type of antibiotic effect; Hill<sub>ABi</sub> = driver of antibiotic effect;  
235 MIC<sub>WT</sub> = 1 mg/L

236 \*divided by 2 for simultaneous dosing regimens

237 Evaluation metrics

238 For evaluation of the simulated scenario's we computed the probability of resistance (PoR), which was defined as  
239 resistant bacteria reaching at the end of treatment at least the initial bacterial density of  $10^4$  CFU/mL, for each  
240 population separately (Equation 13)

$$241 \quad PoR_z = \frac{n_{R,z}}{n} \quad (13)$$

242 where  $n_{R,z}$  denotes the number of patients having resistant bacteria of subpopulation  $z$  at the end of treatment  
243 (Equation 14):

$$244 \quad n_{R,z} = \sum_{k=1}^n \mathbf{1}_{x_{z,k} \geq 10^4} \quad (14)$$

245 where  $\mathbf{1}$  denotes the indicator function and  $x_{z,k}$  denotes the bacterial density of subpopulation  $z$  at the end of  
246 treatment of patient  $k$ .

248 Furthermore we also calculated the PoR for the case where any, i.e., one or more resistant subpopulation(s) exceeded  
249 the resistance cut-off ( $R_{Any}$ ).

250 The standard error (SE) of the PoR was calculated according to **Equation 15**.

$$251 \quad SE = \sqrt{\frac{PoR(1-PoR)}{n}} \quad (15)$$

252 Software and model code

253 All analyses were conducted in R version 4.0.4, using the ODE solver package RxODE (version 1.0.0-0)[23,24]. The  
254 associated model code is available at <https://github.com/vanhasseltlab/CS-PKPD>.

## 255 Results

256 Drug type and treatment schedule influence the probability of resistance

257 We simulated antibiotic combination treatments of two antibiotics from the same type, with either no (0%) or  
258 reciprocal CS (50 or 90% decrease of MIC<sub>WT</sub>). We show that the impact of reciprocal CS on resistance dynamics is  
259 dependent on the simulated drug type and dosing regimen (**Figure 4**). Treatments with concentration dependent  
260 antibiotics could achieve full CS-based resistance suppression for dosing schedules using one-day cycling interval  
261 (**Figure 4C, 4G**) or simultaneous administration (**Figure 4D, 4H**). A 50% MIC reduction was sufficient to achieve this  
262 effect for three out of the four treatments, which is relevant in light of experimental results consistent with these CS  
263 magnitudes. Treatments using time dependent antibiotics dosed according to these schedules (**Figure 4K, 4L, 4O, 4P**)

264 were efficient in fully suppressing resistance with or without CS. Full resistance suppression was not achieved by any of  
 265 the other treatment schedules tested. Although none of the CS-based treatments dosed according to the three-day  
 266 cycling regimen managed to fully suppress resistance, the ones using time dependent antibiotics (**Figure 4J, 4N**) did  
 267 show reduced PoR in presence of CS. For these treatments, the effect of CS was most prominent for the bacteriostatic  
 268 antibiotics (**Figure 4N**) where a CS magnitude of 90% resulted in  $\Delta$ PoR -29.2%. Such a decreased could have a potential  
 269 clinical benefit. Importantly, we also find that for some treatments the presence of CS was not only unable to fully  
 270 suppress resistance, but favoured the formation of double resistant mutants (**Figure 4E, 4F, 4I, 4M**).

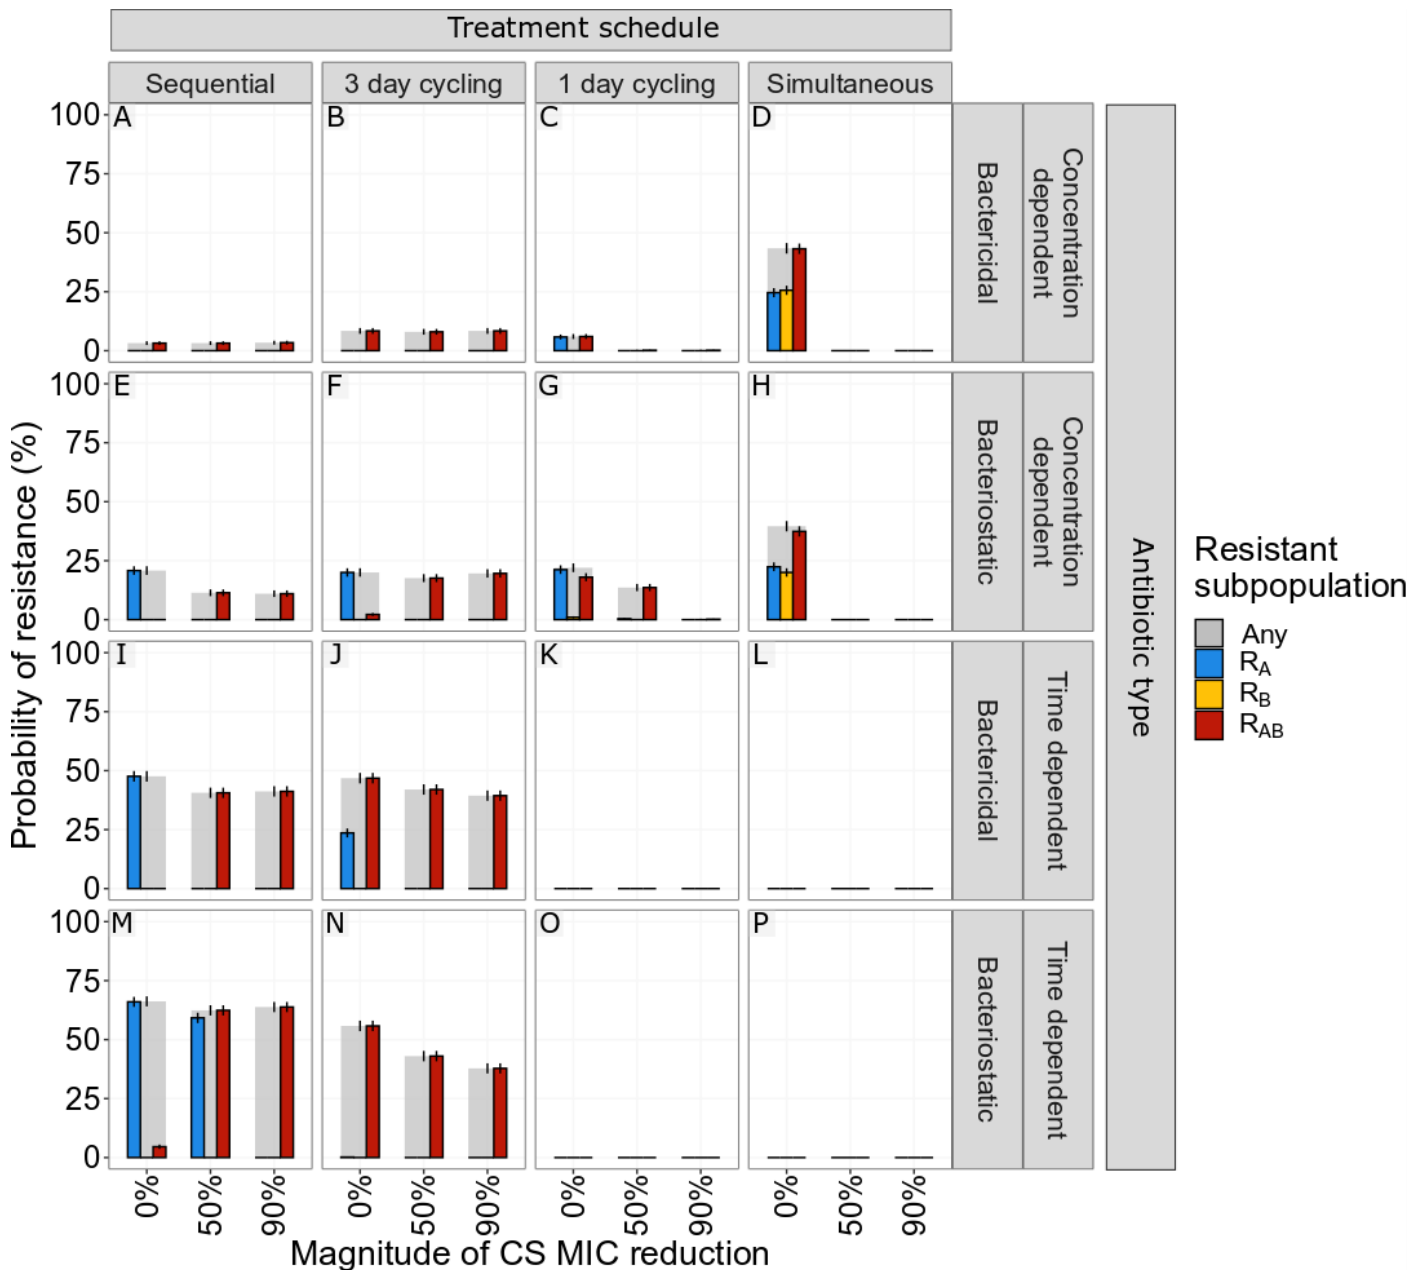

271

272 **Figure 4. The effect of treatment design and antibiotic in relation to different levels of collateral sensitivity (CS) on the probability of resistance**  
 273 **(PoR) at end of treatment.** The simulations show that CS had a profound impact on resistance development for treatments with concentration  
 274 dependent antibiotics with one-day cycling interval or simultaneous administration. PoR was estimated at end of treatment for treatments using  
 275 different designs (columns) and antibiotic types (rows). Subpopulation-specific PoR are indicated by different colour and  $R_{Any}$ , defined as the  
 276 presence of any resistant subpopulation, is indicated in grey. The error bars represent the standard error of the estimation of PoR.

277 Directionality of CS effects influence the probability of resistance  
 278 We next sought to determine if reciprocity is a requirement for CS-based treatments to suppress *de novo* resistance.  
 279 We find that bactericidal and bacteriostatic drugs showed the same overall behaviour for the treatment tested when  
 280 related to CS directionality (**Figure S2**). We specifically focus on the one-day cycling and simultaneous treatment that  
 281 appeared to be most successful in fully suppressing resistance development for reciprocal CS. We find that for the one-  
 282 day cycling regimen the presence of one directional CS for the second administered antibiotic ( $AB_B$ ) is sufficient to  
 283 fully suppress resistance development. This is illustrated for treatments using concentration dependent bacteriostatic  
 284 antibiotic in **Figure 5**. In this scenario, one directional CS results in resistance levels close to the reciprocal scenario  
 285 (e.g., one directional CS resulted in 2.2% PoR of  $R_{Any}$  for bacteriostatic (Figure 5A) vs 0.2% for reciprocal CS (Figure 5B)).  
 286 In contrast, when CS is only present for the first antibiotic ( $AB_A$ ) administered, we found resistance levels close to the  
 287 scenario without any CS (PoR 7.2% (Figure 5D) vs 6.0% (Figure 5C)). Overall, these results suggest that when designing  
 288 CS-based one-day cycling treatments using a drug-pair without reciprocity, the order for which these are  
 289 administered has a large impact on treatment success and the therapy should be initiated with the antibiotic for  
 290 which there is no CS. This strategy allows for evolution and growth of  $R_A$  on the first day, while  $R_B$  is suppressed by  $AB_A$ .  
 291 When the selection is inverted on day two, the low levels of  $R_A$  present is effectively killed by  $AB_B$  in the presence of  
 292 CS. In the absence of CS towards  $AB_B$ ,  $R_A$  will reach high levels, which can lead to further evolution of the  $R_{AB}$ . When  
 293 simultaneous administration of concentration-dependent antibiotics is used, we found that reciprocity is necessary to  
 294 fully suppress resistance, as one directional CS will only suppress resistance for the resistant subpopulation which show  
 295 CS (**Figure 5A and 5B**). However, one directional CS did reduce the PoR for  $R_{Any}$  by approximately 50% ( $\Delta$ PoR -18.4%  
 296 and 20.2% for  $CS_A$  and  $CS_B$ , respectively) for both of these treatments, thus having a potential clinical value.

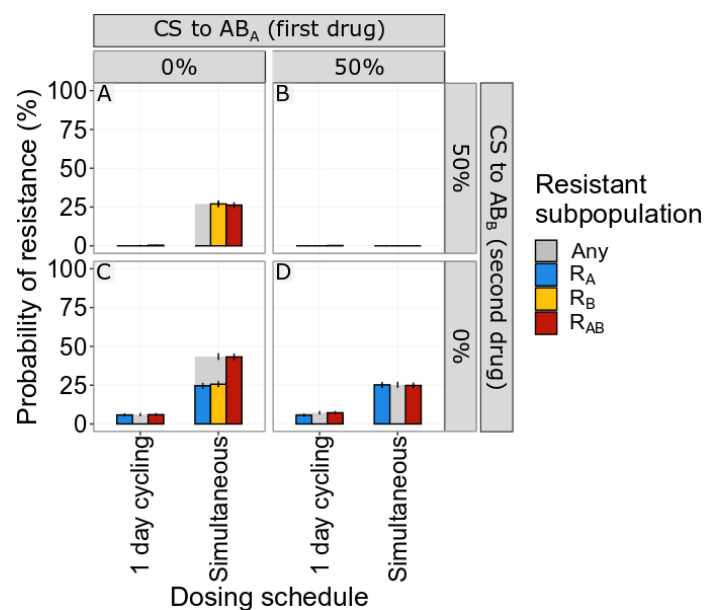

297  
 298 **Figure 5. The effect of the direction or reciprocity of collateral sensitivity (CS) on end of treatment probability of resistance (PoR).** PoR was  
 299 estimated at end of treatment for different CS scenarios using concentration dependent bacteriostatic drugs. Subpopulation-specific PoR is  
 300 indicated by different colour and  $R_{Any}$  resistance, defined as the presence of any resistant subpopulation, is indicated in grey. The error bars  
 301 represent the standard error of the estimation of PoR. For the one-day cycling regimen it became evident that the CS towards the second  
 302 administered drug ( $AB_B$ ) was driving the effect, CS-based dosing using simulations administration of concentration dependent antibiotics  
 303 showed that reciprocity is necessary to suppress overall resistance.

304 Administration sequence and antibiotic type influence resistance suppression  
 305 As CS dose not only occur between antibiotics of the same type, it is important to understand how the administration  
 306 sequence of different-type antibiotics affect resistance evolution in the presence of reciprocal CS. Our results for one-  
 307 day cycling and simultaneous schedules demonstrated that the suppression of *de novo* resistance was mainly driven  
 308 by the first administrated antibiotic ( $AB_A$ ) for all non-simultaneous regimens (**Figure S3**), highlighting the importance  
 309 of drug sequence. In line with our findings for same-type antibiotic combination treatments (**Figure 4**), resistance was  
 310 fully suppressed from CS only when using one-day cycling or simultaneous administration dosing regimens.  
 311 Particularly for one-day cycling regimens (**Figure 6**), initiating treatment with a time-dependent antibiotic was more  
 312 effective at suppressing resistance in the presence of reciprocal CS compared to the initial administration of a  
 313 concentration dependent antibiotic.

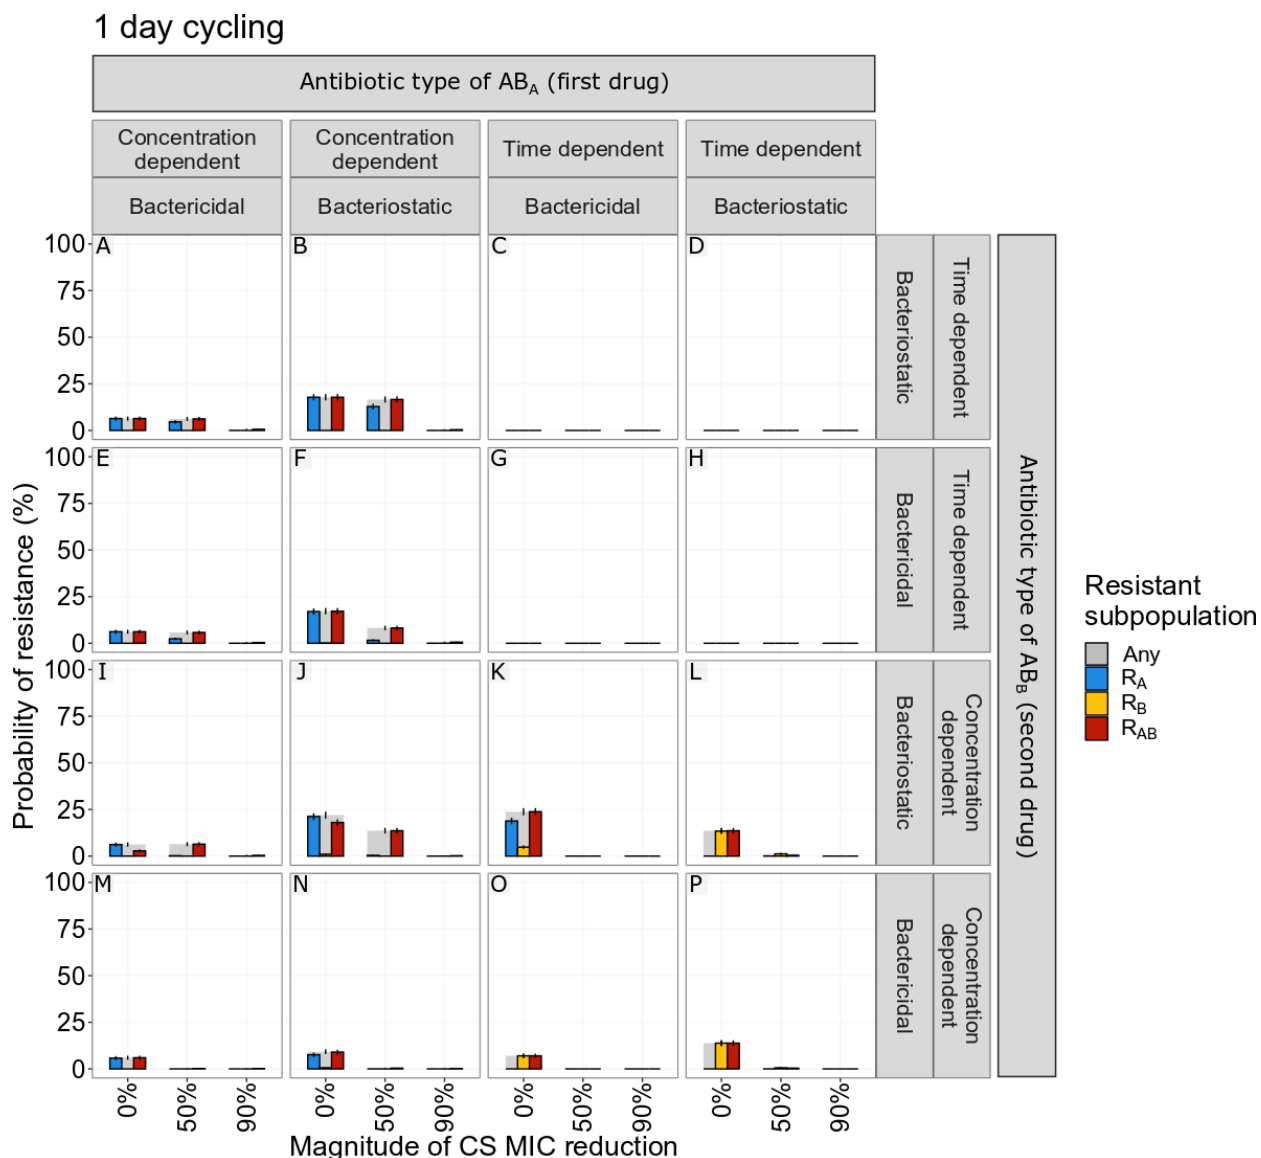

314  
 315 **Figure 6. The effect of using different antibiotic combinations during one-day cycling treatments in relation to different levels of collateral**  
 316 **sensitivity (CS) on the probability of resistance (PoR) at the end of treatment.** The simulations showed that initiating treatment with a time  
 317 dependent than with a concentration dependent antibiotic was more effective in suppressing resistance in the presence of reciprocal CS. PoR was  
 318 estimated at the end of treatment for one-day cycling regimen with different antibiotic combinations. Subpopulation-specific PoR is indicated  
 319 by different colour and  $R_{Any}$ , defined as the presence of any resistant subpopulation, is indicated in grey. The error bars represent the standard  
 320 error of the estimation of PoR.

321 CS-based combinations show greatest promise for antibiotics with a narrow therapeutic window  
 322 Although many antibiotics are well-tolerated and can be dosed well above the MIC of susceptible strains others, *e.g.*,  
 323 aminoglycosides, display a narrow therapeutic window due to toxicity[25–27]. Understanding the relationship  
 324 between average steady-state concentrations ( $C_{ss}$ ) and the impact of CS on *de novo* resistance development would  
 325 help identify which clinical scenarios that CS could be exploited to improve treatment. A set of simulated dosing  
 326 regimens with same-type antibiotics resulting in  $C_{ss}$  between 0.5-5 x  $MIC_{WT}$  revealed that CS has the greatest impact  
 327 on  $R_{Any}$  for  $C_{ss}$  close to the  $MIC_{WT}$  (**Figure 7** and **S4**). Most treatments showing a benefit of CS lost the advantage when  
 328 the  $C_{ss}$  exceeded 1.5 x  $MIC_{WT}$ . The only exception was one-day cycling treatment using concentration dependent  
 329 bacteriostatic drugs, which retained an advantage up to  $C_{ss}$  of 2 x  $MIC_{WT}$  (**Figure 7G**).

330

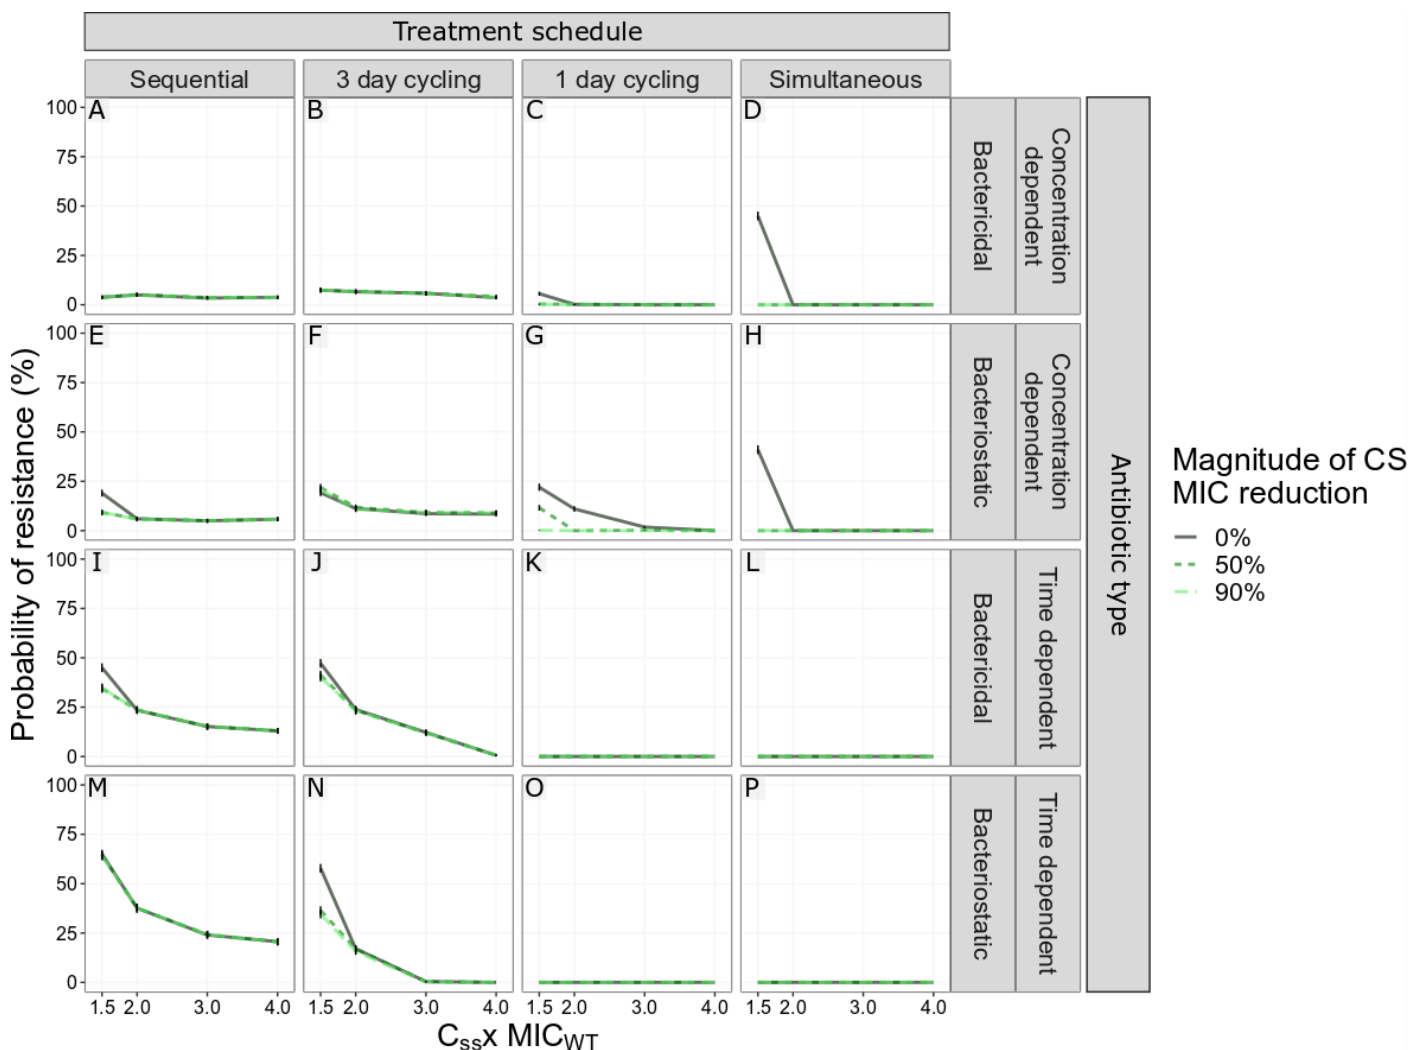

331

332 **Figure 7. The effect of antibiotic steady state concentrations ( $C_{ss}$ ) in relation to different levels of collateral sensitivity (CS) on the probability**  
 333 **of resistance at the end of treatment (PoR).** The simulation revealed that CS had the largest impact on PoR for  $C_{ss}$  close to MIC of the wild type  
 334 strain ( $MIC_{WT}$ ).  $C_{ss}$  was expressed as factor difference from the  $MIC_{WT}$ . PoR of  $R_{Any}$ , defined as the presence of any resistant subpopulation, was  
 335 estimated at the end of treatment for treatments using different designs (columns) and antibiotic types (rows). Colour and line-type indicate the  
 336 magnitude of reciprocal CS simulated. The error bars represent the standard error of the estimation.

337

338 Fitness cost of antibiotic resistance can contribute to the success of CS-based treatments  
 339 Resistance evolution is commonly associated with fitness costs.[28]. We studied the impact of different levels of fitness  
 340 cost on the suppression of *de novo* resistance development (**Figure 8**). Fitness cost was included as a fractional  
 341 reduction of growth per mutation, thereby doubly penalising the double resistant mutant  $R_{AB}$ . In the absence of CS,  
 342 fitness cost below 50% per mutation had little impact ( $\Delta\text{PoR} > -5\%$ ) on  $R_{Any}$  for most treatment scenarios, except for  
 343 the three-day cycling regimen using time dependent bacteriostatic drugs (**Figure 8N**), which showed a clear  
 344 relationship between increasing fitness cost and decreasing  $R_{Any}$ . The presence of fitness costs increased the impact of  
 345 CS on PoR for a number of treatments, including three-day cycling regimen using time dependent antibiotics (**Figure**  
 346 **8J and 8N**) and one-day cycling with concentration dependent bacteriostatic drugs (**Figure 8G**). In the case of these  
 347 three-day cycling regimens, which failed to fully suppress resistance in the presence of fitness cost-free CS, the impact  
 348 of fitness differed between bactericidal and bacteriostatic drug (**Figure 8J vs 8N**). The fitness cost generating the largest  
 349 impact of CS (90%) for these treatments on PoR was 20% and 40% cost per mutation when treated with bacteriostatic  
 350 ( $\Delta\text{PoR} -35.0$ ) and bactericidal ( $\Delta\text{PoR} -43.8\%$ ) drug, respectively.

351

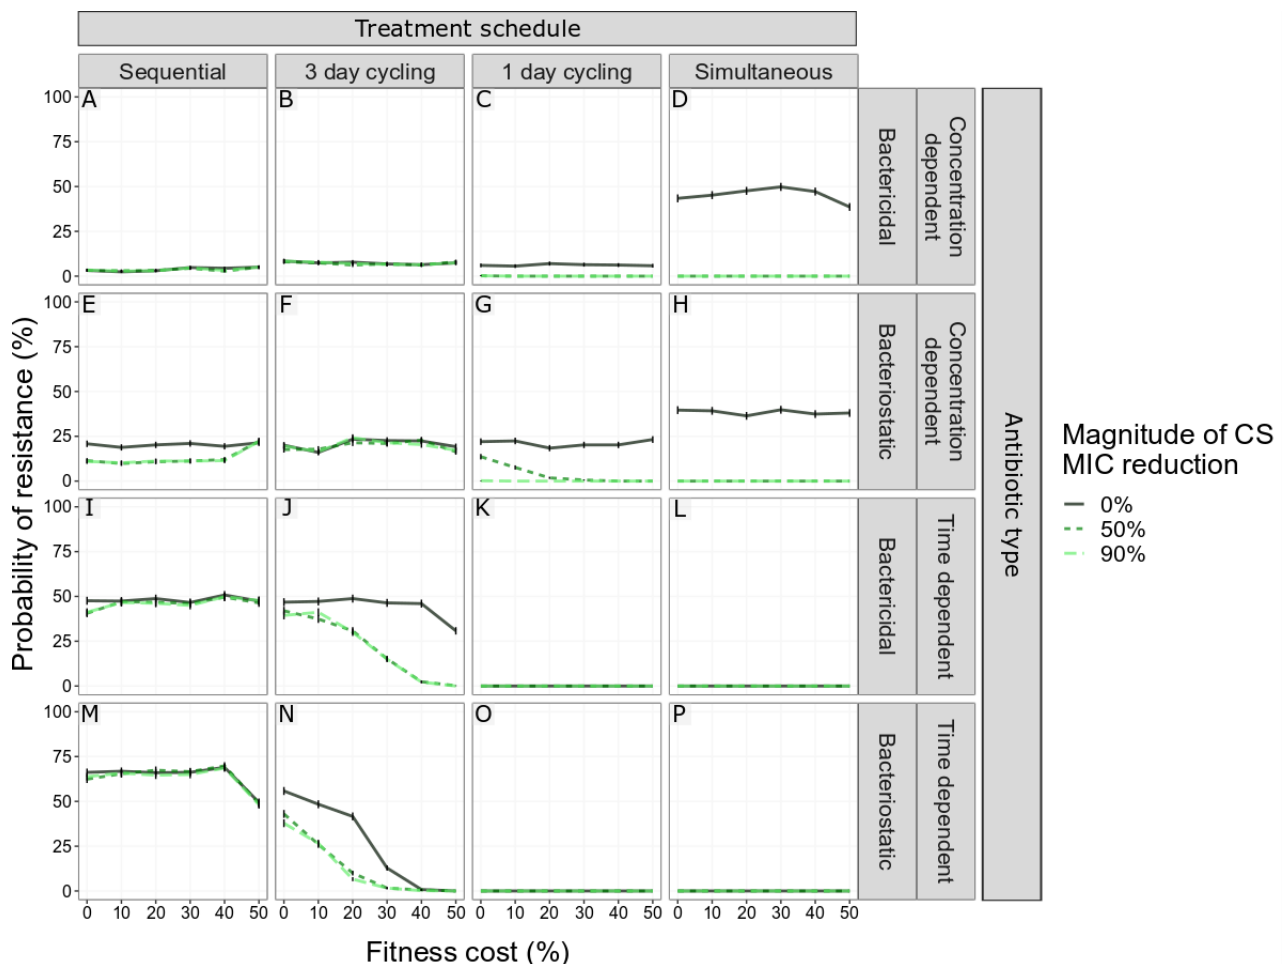

352

353 **Figure 8. The effect of fitness costs for developing resistance for different levels of collateral sensitivity effects on the probability of resistance**  
 354 **(PoR).** PoR of  $R_{Any}$ , defined as the presence of any resistant subpopulation, was estimated at end of treatment for treatments using different  
 355 designs (columns) and antibiotic types (rows). Colour and line-type indicate the magnitude of reciprocal CS simulated. The error bars represent  
 356 the standard error of the estimation of PoR.



357 CS-based simultaneous treatment designs suppress pre-existing resistance

358 The presence of a low-number pre-existing resistant cells amongst the bacterial population establishing an infection  
 359 is a clinically realistic scenario associated with antibiotic-treatment failure[29]. We here studied if CS-based dosing  
 360 schedules can be used to eradicate such a heterogeneous population (**Figure 9 and S5**). In the absence of CS, the pre-  
 361 existence of a subpopulation of either single mutant, resulted in higher probability of the expansion and fixation of  
 362 these resistant populations. As with de novo resistance and cycling regimens, the benefit of reciprocal CS was only  
 363 apparent when resistance was towards the second antibiotic ( $R_B$ ). This is illustrated with the one-day cycling  
 364 treatments shown in Figure 9, where all CS-based treatments could suppress PoR for pre-existing  $R_B$ , but for failed for  
 365 all with pre-existing  $R_A$ . For three day cycling of concentration dependent drugs and pre-existing resistance towards  
 366 the first antibiotic, CS was shown to increase the PoR (**Figure S5**). In the presence of CS, all simultaneously dosed  
 367 treatments were effective in fully suppressing resistance regardless of pre-existing resistance .

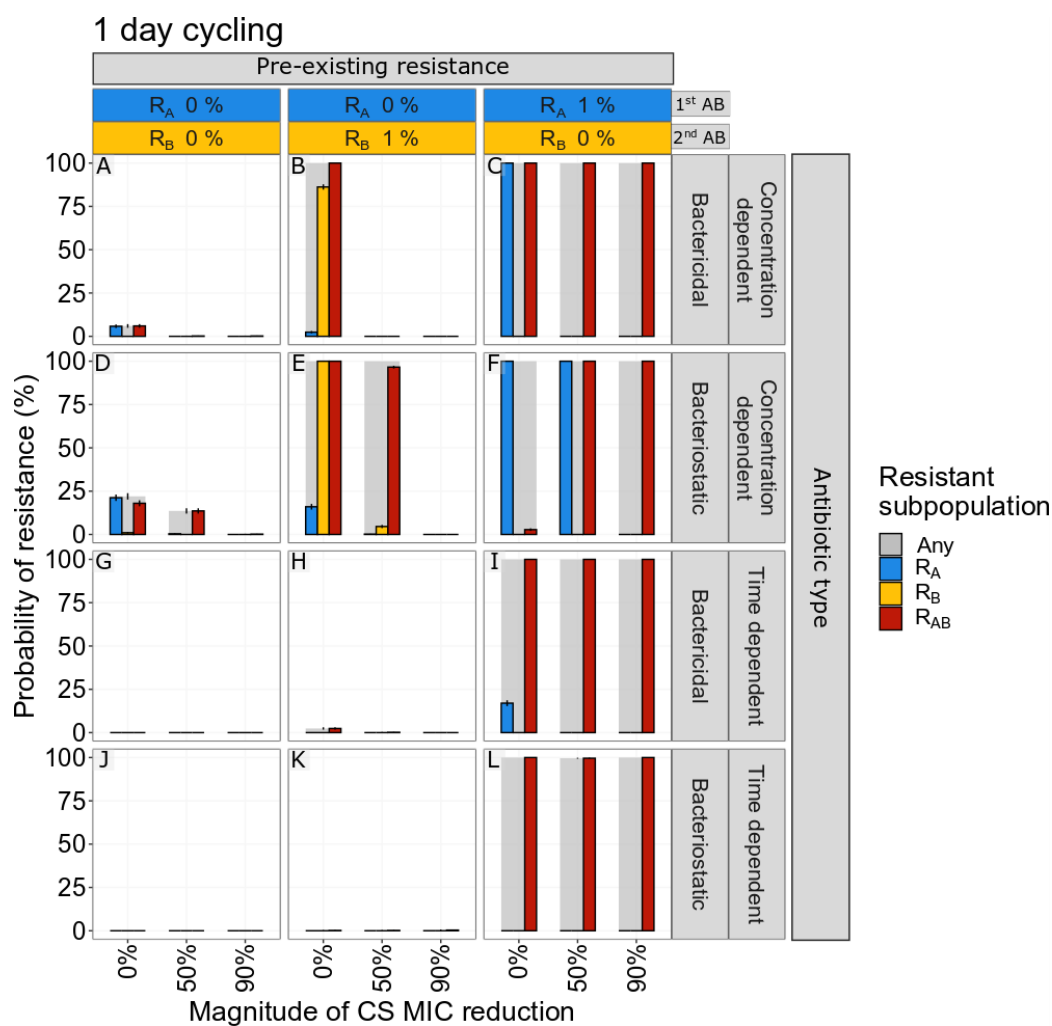

368

369

370 **Figure 9. The effect of pre-existing resistant mutants for different magnitudes of collateral sensitivity on the probability of resistance (PoR).**  
 371 PoR was estimated at the end of treatment for different scenarios of low levels of pre-existing resistance (columns) and antibiotic types (rows).  
 372 Subpopulation-specific probability of resistance is indicated by colour and PoR of  $R_{Any}$ , defined as the presence of any resistant subpopulation,  
 373 is indicated in grey. The error bars represent the standard error of the estimation of PoR.

374 The combined effect of CS and mutation rate on resistance development differs between treatments  
 375 Because some antibiotic treatments can enhance the genome-wide mutation rate in pathogenic bacteria [30], we  
 376 included a set of simulations with higher mutation rates than  $10^{-9}$  mutations/bp/h ( $10^{-8}$ - $10^{-6}$  mutations/bp/h). We show  
 377 that the impact of mutation rate on the PoR was dependent on the combination of treatment design and the antibiotic  
 378 type used, especially in the presence of CS (Figure 10). The largest impact of the interaction between CS and mutation  
 379 on PoR was found for the extremes of the time between switching of antibiotics, *i.e.*, one-day cycling and sequential  
 380 treatment design (maximum  $\Delta$ PoR -71.6% and -52.0%, respectively). In the absence of CS an increased mutation rate  
 381 generally led to an increased PoR, with the exception of simultaneous administration of time-dependent antibiotics,  
 382 which actually resulted in full suppression of resistance regardless of CS and mutation rate. For some sequential  
 383 treatments with reciprocal CS (Figure 10E, 10I), the highest PoR was observed at a mutation rate of  $10^{-7}$   
 384 mutations/bp/hour, and decreased at higher mutation rates. For all mutation rates and in the presence of CS,  
 385 simultaneous treatments conferred resistance suppression.

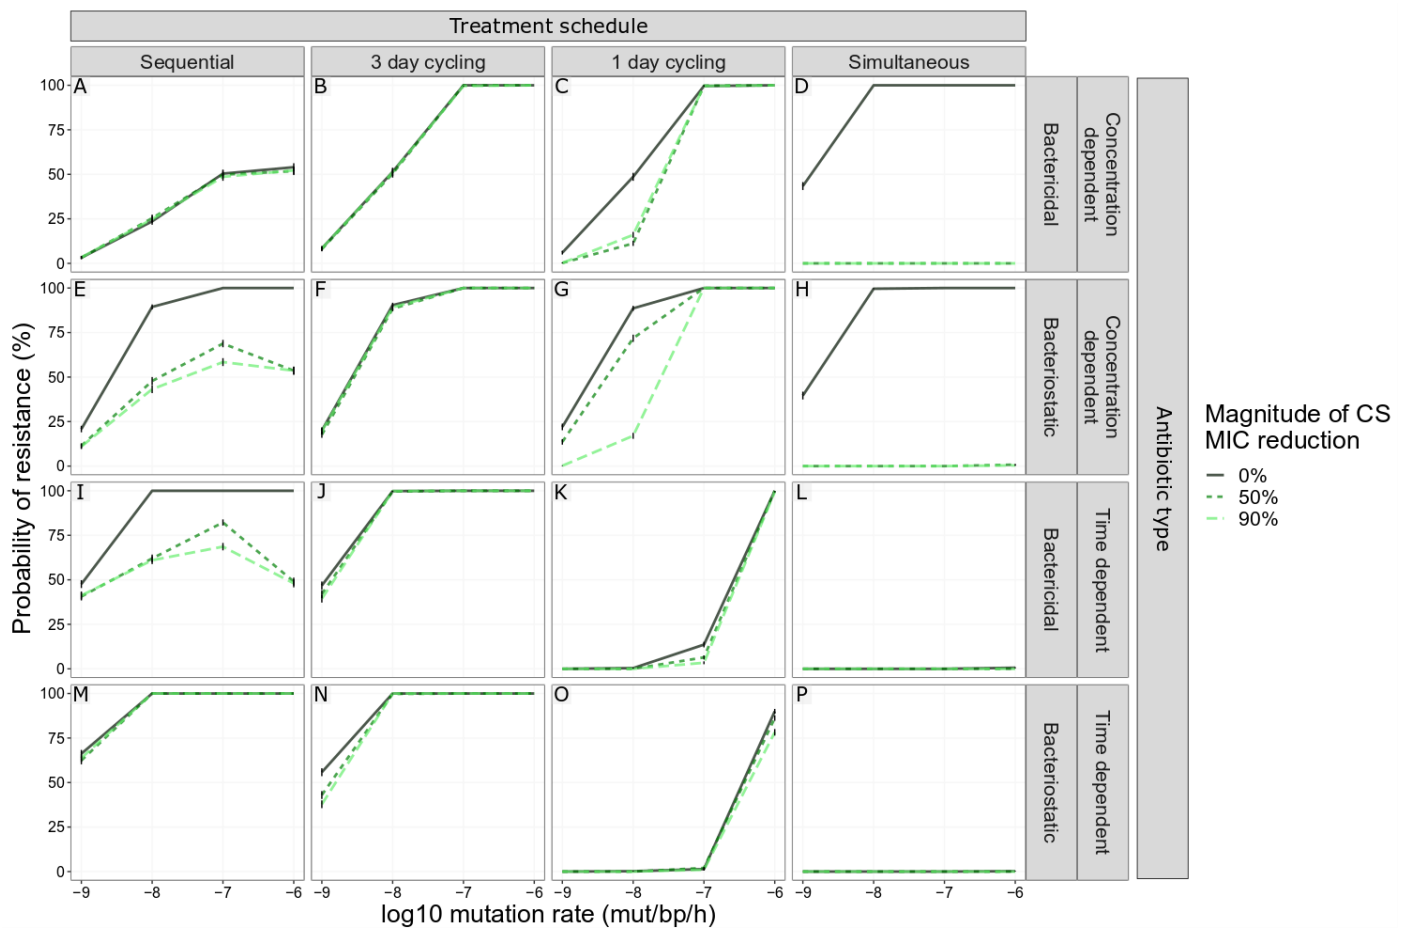

386

387 **Figure 10. The effect of increased mutation rate for different CS magnitudes on the probability of resistance (PoR).** The combined impact of  
 388 mutation rate and the CS on PoR was dependent on treatment schedule. PoR of  $R_{Any}$ , defined as the presence of any resistant subpopulation,  
 389 was estimated at the end of treatment for treatments using different designs (columns) and antibiotic types (rows) for different mutation rates  
 390 ( $x$ -axis). Colour and line-type indicate the magnitude of reciprocal CS simulated. The error bars represent the standard error of the estimation.

391

## 392 Discussion

393 Our analysis shows that CS can be exploited to design treatment schedules that suppress antibiotic resistance, where  
394 CS-based treatments hold the most potential for antibiotics with narrow-therapeutic windows. Our modelling  
395 approach indicated that several factors need to be considered to ensure optimal design of CS-based dosing regimens,  
396 which include antibiotic PD characteristics, the magnitude and reciprocity of CS effects, and the effect of fitness costs,  
397 and we found that the antibiotic sequence is of importance for the success of CS-based cycling treatments.

398 CS-based dosing schedules have mainly considered reciprocal CS scenarios, where resistance against one antibiotic  
399 leads to increased sensitivity and vice versa[12,16]. We show, however, that one directional CS can be sufficient to  
400 suppress resistance. For a one-day cycling regimen, the one-directional CS effects were nearly identical to the scenario  
401 that considered reciprocal CS (**Figure 5A vs 5B**), but only when bacteria showed CS to the second drug administered.  
402 In the case where CS was only present for the first antibiotic ( $AB_A$ ) (**Figure 5D**), the initial bacterial growth was  
403 extensive, thus leading to increased risk of the double resistant subpopulation emerging. We consider this finding  
404 relevant because one-directional CS relationships are much more common than reciprocal CS relationships [9–16],  
405 thus expanding the number of clinical scenarios for which CS-based treatments can be designed.

406 We find that CS-based treatments show the greatest promise for antibiotics with narrow therapeutic window. The  
407 therapeutic window of an antibiotic is defined by the drug exposure, or concentration range, leading to sufficient  
408 efficacy while not leading to toxicity. In the majority of our simulations, we have studied dosing schedules leading to  
409 an antibiotic steady state concentrations ( $C_{ss}$ ) of  $1.5 \times \text{MIC}$ , which led to full kill of the sensitive population but did allow  
410 emergence of resistance to occur. This concentration can be considered to reflect a narrow-therapeutic window  
411 antibiotic, *e.g.*, where the antibiotic concentration required for bacterial killing is closer to the MIC because of  
412 occurrence of (severe) toxicities at higher concentrations. Indeed, for concentrations (much) higher than the MIC, the  
413 benefit of CS rapidly disappears (**Figure 7**). This means that in particular for antibiotics with a narrow therapeutic  
414 windows such as polymyxins or aminoglycosides, the relevance of CS-based dosing schedules is most significant.

415 Cycling based dosing regimens are frequently discussed as a strategy to utilize when CS occurs. We show that for one-  
416 day cycling treatments antibiotic type (**Figure 6**), directionality of CS (**Figure 5**), and the identity of any pre-existing  
417 resistance subpopulation (**Figure 9**) should be considered when choosing which drug to initiate therapy with. We find  
418 that the type of the first administered antibiotic had a larger impact on the PoR compared to the type of the second  
419 administered antibiotic, the presences of CS to the second administered antibiotic had a greater effect PoR compared  
420 to CS to the first administered antibiotic, and the PoR was smaller if there was pre-existing resistance to the second  
421 administered drug compared to the first antibiotic. These findings are in line with previous studies which show that  
422 the probability of resistance development is influenced by the sequence of antibiotics[31], and optimized cycling  
423 sequences outperformed random drug cycling regimens [13]. Furthermore, in the context of cycling, or alternating  
424 antibiotic treatments, consideration of the pharmacokinetics, *e.g.* the time-varying antibiotic concentrations was  
425 found to be of importance because remaining concentration of the first antibiotic administered add to the total drug  
426 effect. Therefore, the antibiotic switch contributes to a higher total drug effect than after repeated administration of

427 the same drug. In our simulations, the impact of this increased effect is dependent on the type of the antibiotic and  
428 was shown to be especially important for time-dependent antibiotics.

429 To better characterize the population dynamics of pathogens in response to antibiotic treatment under presence of  
430 CS, we studied the effect of fitness costs of antibiotic resistance and mutation rates leading to antibiotic resistance.  
431 We find that the introduction of fitness cost had negligible effect on PoR for the majority of the simulated CS-based  
432 treatments, with the exception of the three-day cycling using time dependent antibiotics (**Figure 8J and 8N**), where  
433 the introduction of fitness cost improved the CS-based treatments because it prevents resistant bacteria to reach high  
434 levels before the first antibiotic switch. Pathogens with a low mutation rate ( $10^{-9}$ ), one-day cycling regimens are most  
435 relevant to benefit from CS, whereas for high mutation rates (*e.g.*,  $10^{-6}$ ), sequential or simultaneous antibiotic  
436 treatments are most beneficial (**Figure 10**). This means that in situations when the occurrence of hypermutator strains  
437 is likely, *e.g.*, such as in CF [32], this should be considered in the design of dosing schedules. With respect to the  
438 competition between different bacterial subpopulations occurring *in vivo*, we included a bacterial carrying capacity  
439 which introduces clonal competition. During clonal competition, competition between subpopulations can lead to  
440 their suppression, *e.g.*, high densities for one subpopulation can suppress the growth of a second subpopulation, even  
441 if the second population might be more fit. When CS is present, single resistant subpopulations are unable to reach  
442 high enough levels to suppress the growth of the double resistant mutant, which allows the double mutant to take  
443 over, for some treatments.

444 Udekwu *et al*[33] previously demonstrated the utility of mathematical modelling to study cycling schedules for CS to  
445 delay emergence of antibiotic resistance *in silico*, simulating an *in vitro* chemostat experimental system, identifying  
446 the cycling interval to be the main factor impacting resistance development, and we consider this work as an important  
447 foundation of our study. Our study advances the work by Udekwu by explicitly comparing treatment outcomes to a  
448 base scenario without CS to determine the specific contribution of CS effects, and we perform a more systematic  
449 analysis of key drug- and pathogen specific factors that could influence optimal CS-based treatment scenarios.

450 Our mathematical model was designed to facilitate identification of the primary factors driving the success or failure  
451 of antibiotic treatments in a general setting, and not for specific antibiotics or pathogens. We thereby did not consider  
452 factors that could further contribute to treatment outcomes for specific pathogens or antibiotics. We did not consider  
453 more complex evolutionary mutational trajectories can occur with associated complex patterns of changes in antibiotic  
454 sensitivity and MIC[36], which are not easily definable to apply to antibiotic treatment in general. Other factors not  
455 considered include local antibiotic tissue concentrations [34,35], pharmacodynamic drug-drug interactions or the  
456 contribution of the immune system. We expect that such factors will not affect specific subpopulations studied in  
457 different ways and therefore not have a great impact on the general findings we do in this analysis. The developed  
458 modelling framework is applicable for design of clinical treatment designs for specific antibiotic agents and pathogens,  
459 where the model can be further expanded with additional pathogen-, drug-, and patient-specific characteristics[37],  
460 derived from separate experimental studies and by utilizing published clinical population PK models for specific  
461 antibiotics[38,39], which include inter-individual variability or target site concentrations at the site of infection. This  
462 would thus allow to derive tailored CS-based dosing regimens for specific antibiotics and pathogens.

463 We conclude that CS-based treatments are likely to be able to contribute in the suppression of resistance. However,  
464 the success of such treatment strategies will be dependent on careful design of a dosing schedule, and requires explicit  
465 consideration of pathogen- and drug-specific characteristics. Our developed modelling framework can be of use to  
466 facilitate the design of such treatment. In addition, the robustness of such CS effects is another external factor that  
467 remains a key requirement, although reciprocal CS may not be a requirement to design such dosing schedules. CS  
468 treatments appear to be most relevant for antibiotics with a narrow therapeutic index, which are also the antibiotics  
469 where within-host emergence of resistance is most likely to occur.

## 470 Acknowledgements

471 We wish to acknowledge Hadi Taghvafard for helpful mathematical input and Laura Zwep for valuable discussions.

## 472 Competing interests

473 No competing interest to declare.

## 474 References

- 475 1. Luepke KH, Suda KJ, Boucher H, Russo RL, Bonney MW, Hunt TD, et al. Past, Present, and Future of Antibacterial  
476 Economics: Increasing Bacterial Resistance, Limited Antibiotic Pipeline, and Societal Implications. *Pharmacotherapy*. 2017;  
477
- 478 2. Mcgrath DM, Qin X, Mojica MF, Miller C, Diaz L, Sc B, et al. Genetic Basis for In Vivo Daptomycin Resistance in  
479 Enterococci. *n engl j med*. 2011;365:892–900.
- 480 3. Mwangi MM, Wu SW, Zhou Y, Sieradzki K, Lencastre H De, Richardson P, et al. Tracking the in vivo evolution of  
481 multidrug resistance in *Staphylococcus aureus* by whole-genome sequencing. *Proc Natl Acad Sci U S A*.  
482 2007;104(22):9451–6.
- 483 4. Nielsen EI, Friberg LE. Pharmacokinetic-pharmacodynamic modeling of antibacterial drugs. *Pharmacol Rev*.  
484 2013;65(3):1053–90.
- 485 5. Bonhoeffer S, Lipsitch M, Levin BR. Evaluating treatment protocols to prevent antibiotic resistance. *Proc Natl*  
486 *Acad Sci U S A*. 1997;94(22):12106–11.
- 487 6. Baym M, Stone LK, Kishony R. Multidrug evolutionary strategies to reverse antibiotic resistance. *Science (80- )*.  
488 2016;351(6268):aad3292–aad3292.
- 489 7. Imamovic L, Sommer MOA. Use of collateral sensitivity networks to design drug cycling\nprotocols that avoid  
490 resistance development. *Sci Transl Med*. 2013;5(204):204ra132.
- 491 8. Lejla Imamovic A, Mostafa Hashim Ellabaan M, Manuel Dantas Machado A, Molin S, Krogh Johansen H, Otto  
492 Alexander Sommer M, et al. Drug-Driven Phenotypic Convergence Supports Rational Treatment Strategies of  
493 Chronic Infections. *Cell*. 2018;172:121–34.
- 494 9. Podnecky NL, Fredheim EGA, Kloos J, Sørnum V, Primicerio R, Roberts AP, et al. Conserved collateral antibiotic  
495 susceptibility networks in diverse clinical strains of *Escherichia coli*. *Nat Commun [Internet]*. 2018;9(1):3673.  
496 Available from: <https://doi.org/10.1038/s41467-018-06143-y>
- 497 10. Barbosa C, Römhild R, Rosenstiel P, Schulenburg H. Evolutionary stability of collateral sensitivity to antibiotics  
498 in the model pathogen *Pseudomonas aeruginosa*. *Elife [Internet]*. 2019 Oct 29;8:1–22. Available from:  
499 <https://elifesciences.org/articles/51481>
- 500 11. Gonzales PR, Pesesky MW, Bouley R, Ballard A, Bidy BA, Suckow MA, et al. Synergistic, collaterally sensitive  $\beta$ -  
501 lactam combinations suppress resistance in MRSA. *Nat Chem Biol*. 2015;11(11):855–61.

- 502 12. Imamovic L, Sommer MOA. Use of collateral sensitivity networks to design drug cycling protocols that avoid  
503 resistance development. *Sci Transl Med*. 2013;5(204).
- 504 13. Maltas J, Wood KB. Pervasive and diverse collateral sensitivity profiles inform optimal strategies to limit  
505 antibiotic resistance. *Schulenburg H, editor. PLOS Biol [Internet]*. 2019 Oct 25;17(10):e3000515. Available from:  
506 <https://dx.plos.org/10.1371/journal.pbio.3000515>
- 507 14. Barbosa C, Trebosc V, Kemmer C, Rosenstiel P, Beardmore R, Schulenburg H, et al. Alternative Evolutionary  
508 Paths to Bacterial Antibiotic Resistance Cause Distinct Collateral Effects. *Mol Biol Evol*. 2017;34(9):2229–44.
- 509 15. Liakopoulos A, Aulin LBS, Buffoni M, van Hasselt JGC, Rozen DE. Allele-specific collateral and fitness effects  
510 determine the dynamics of fluoroquinolone-resistance evolution. *bioRxiv [Internet]*. 2020 Jan  
511 1;2020.10.19.345058. Available from:  
512 <http://biorxiv.org/content/early/2020/10/19/2020.10.19.345058.abstract>
- 513 16. Kim S, Lieberman TD, Kishony R. Alternating antibiotic treatments constrain evolutionary paths to multidrug  
514 resistance. *Proc Natl Acad Sci [Internet]*. 2014 Oct 7;111(40):14494–9. Available from:  
515 <http://www.pnas.org/content/111/40/14494.abstract>
- 516 17. Regoes RR, Wiuff C, Zappala RM, Garner KN, Baquero F, Levin BR. Pharmacodynamic Functions: a  
517 Multiparameter Approach to the Design of Antibiotic Treatment Regimens. *Antimicrob Agents Chemother*.  
518 2004;48(10):3670–6.
- 519 18. Coen Van Hasselt JG, Iyengar R. Systems pharmacology: Defining the interactions of drug combinations. *Annu  
520 Rev Pharmacol Toxicol*. 2019;59:21–40.
- 521 19. Pál C, Papp B, Lázár V. Collateral sensitivity of antibiotic-resistant microbes. *Trends Microbiol*. 2015;23(7):401–  
522 7.
- 523 20. Sharma R, Sharma S. Physiology , Blood Volume. Vol. I, StatPearls. 2020. p. 6–9.
- 524 21. Gerlini A, Colomba L, Furi L, Braccini T, Manso AS, Pammolli A, et al. The Role of Host and Microbial Factors in  
525 the Pathogenesis of Pneumococcal Bacteraemia Arising from a Single Bacterial Cell Bottleneck. 2014;10(3).
- 526 22. Martínez JL, Baquero F. Mutation Frequencies and Antibiotic Resistance. *Antimicrob Agents Chemother*.  
527 2000;44(7):1771–7.
- 528 23. Wang W, Hallow KM, James DA. A Tutorial on RxODE : Simulating Differential Equation Pharmacometric Models  
529 in R. 2016;(August 2015):3–10.
- 530 24. Fidler M, Hallow M, Wilkins J WW. RxODE: Facilities for Simulating from ODE-Based Models. R package version  
531 1.0.6 [Internet]. 2021. Available from: <https://cran.r-project.org/package=RxODE>
- 532 25. Falagas ME, Kasiakou SK. Toxicity of polymyxins: A systematic review of the evidence from old and recent  
533 studies. *Crit Care*. 2006;10(1).
- 534 26. Mattie H, Craig WA, Pechere JC. Determinants of efficacy and toxicity of aminoglycosides. *J Antibiot (Tokyo)*.  
535 1989;24:281–93.
- 536 27. Zasowski EJ, Murray KP, Trinh TD, Finch NA, Pogue JM, Mynatt RP. crossm Identification of Vancomycin  
537 Exposure-Toxicity Thresholds in Hospitalized Patients Receiving Intravenous Vancomycin. *Antimicrob Agents  
538 Chemother*. 2018;62(1):e01684-17.
- 539 28. Andersson DI, Hughes D. Antibiotic resistance and its cost : is it possible to reverse resistance ? *Nat Rev  
540 Microbiol*. 2010;8.
- 541 29. Band VI, Crispell EK, Napier BA, Herrera CM, Tharp GK, Vavikolanu K, et al. Antibiotic failure mediated by a  
542 resistant subpopulation in *Enterobacter cloacae*. *Nat Microbiol*. 2016;1:16053.
- 543 30. Long H, Miller SF, Strauss C, Zhao C, Cheng L, Ye Z, et al. Antibiotic treatment enhances the genome-wide  
544 mutation rate of target cells. 2016;
- 545 31. Nichol D, Jeavons P, Fletcher AG, Bonomo RA, Maini PK, Paul JL, et al. Steering Evolution with Sequential

- 546 Therapy to Prevent the Emergence of Bacterial Antibiotic Resistance. Antia R, editor. PLOS Comput Biol  
547 [Internet]. 2015 Sep 11;11(9):e1004493. Available from: <https://dx.plos.org/10.1371/journal.pcbi.1004493>
- 548 32. Looft C, Reinsch N, Rudat I, Kalm E, Sel G, Chardon P, et al. High Frequency of Hypermutable *Pseudomonas*  
549 *aeruginosa* in Cystic Fibrosis Lung Infection. *Science* (80- ). 2000;288(5469):1251–4.
- 550 33. Udekwi KI, Weiss H. Pharmacodynamic considerations of collateral sensitivity in design of antibiotic treatment  
551 regimen. *Drug Des Devel Ther* [Internet]. 2018 Jul;Volume 12:2249–57. Available from:  
552 [https://www.dovepress.com/pharmacodynamic-considerations-of-collateral-sensitivity-in-design-of-peer-](https://www.dovepress.com/pharmacodynamic-considerations-of-collateral-sensitivity-in-design-of-peer-reviewed-article-DDDT)  
553 [reviewed-article-DDDT](https://www.dovepress.com/pharmacodynamic-considerations-of-collateral-sensitivity-in-design-of-peer-reviewed-article-DDDT)
- 554 34. Väitalo PAJ, Griffioen K, Rizk ML, Visser SAG, Danhof M, Rao G, et al. Structure-Based Prediction of Anti-  
555 infective Drug Concentrations in the Human Lung Epithelial Lining Fluid. *Pharm Res*. 2016;856–67.
- 556 35. Aulin LBS, Valitalo PA, Rizk ML, Visser SAG, Rao G, Graaf PH Van Der, et al. Validation of a Model Predicting  
557 Anti-infective Lung Penetration in the Epithelial Lining Fluid of Humans. *Pharm Res*. 2018;6–9.
- 558 36. Aulin LBS, Koumans CIM, Haakman Y, van Os W, Kraakman MEM, Gooskens J, et al. Distinct evolution of colistin  
559 resistance associated with experimental resistance evolution models in *Klebsiella pneumoniae*. *J Antimicrob*  
560 *Chemother*. 2020;1–3.
- 561 37. Aulin LBS, Lange DW, Saleh MAA, Graaf PH, Völler S, Hasselt JGC. Biomarker-Guided Individualization of  
562 Antibiotic Therapy. *Clin Pharmacol Ther* [Internet]. 2021 Mar 2;0(0):cpt.2194. Available from:  
563 <https://onlinelibrary.wiley.com/doi/10.1002/cpt.2194>
- 564 38. Aulin LBS, De Paepe P, Dhont E, de Jaeger A, Vande Walle J, Vandenberghe W, et al. Population  
565 Pharmacokinetics of Unbound and Total Teicoplanin in Critically Ill Pediatric Patients. *Clin Pharmacokinet*  
566 [Internet]. 2020;(0123456789). Available from: <https://doi.org/10.1007/s40262-020-00945-4>
- 567 39. Cock PAJG De, Mulla H, Desmet S, Somer F De, Mcwhinney BC, Ungerer JPJ, et al. Population pharmacokinetics  
568 of cefazolin before , during and after cardiopulmonary bypass to optimize dosing regimens for children  
569 undergoing cardiac surgery. *J Antimicrob Chemother*. 2017;72:791–800.

570

571

572 Supplementary figures

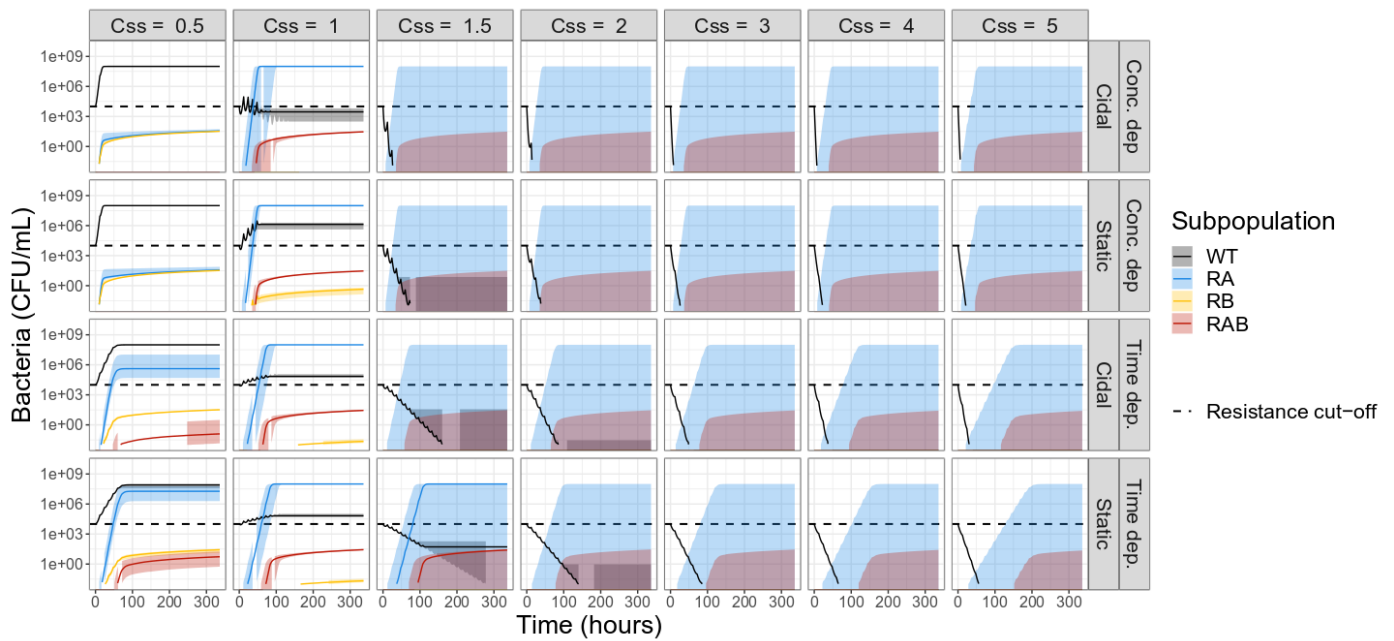

573

574 **Figure S1. Bacterial dynamics for simulated monotherapy using different antibiotic types (rows) and steady state concentrations**  
575 **(C<sub>ss</sub>) relating to the MIC of the wild type (WT) (columns).** These simulations shows that monotherapy required C<sub>ss</sub> equal to  
576 1.5 x MIC<sub>WT</sub> to achieve killing of the WT, regardless of the drug type used. Subpopulation-specific bacterial density are  
577 indicated by different colures, where the solid lines indicate the median and the shaded area covers the 5<sup>th</sup>-95<sup>th</sup>  
578 percentiles of the predictions. The resistance cut-off (dashed line) is used for end of treatment evaluation of resistance.



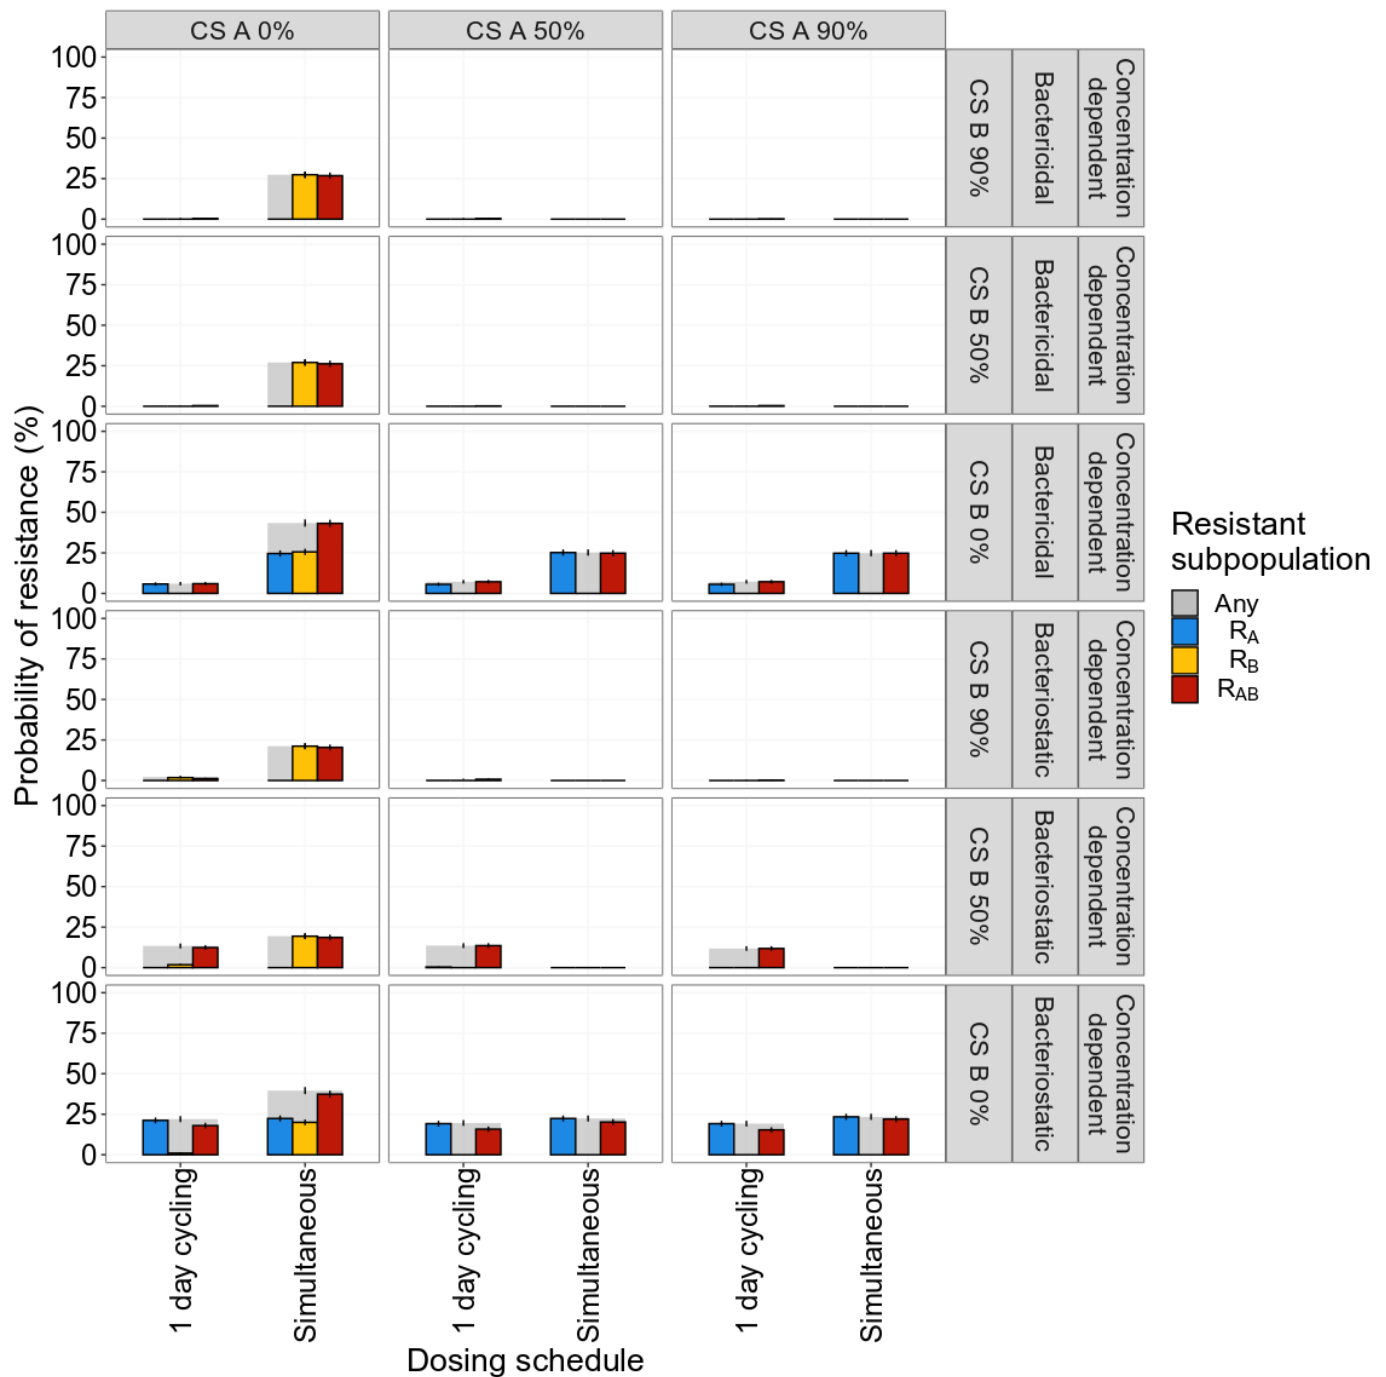

579  
580  
581  
582  
583  
584  
585  
586

**Figure S2. The effect of the direction or reciprocity of collateral sensitivity (CS) on end of treatment probability of resistance (PoR).** PoR was estimated at end of treatment for different CS scenarios using concentration dependent bacteriostatic or bactericidal drugs. Subpopulation-specific PoR is indicated by different colour and  $R_{Any}$  resistance, defined as the presence of any resistant subpopulation, is indicated in grey. The error bars represent the standard error of the estimation of PoR. For the one-day cycling regimen it became evident that the CS towards the second administered drug ( $AB_B$ ) was driving the effect, CS-based dosing using simulations administration of concentration dependent antibiotics showed that reciprocity is necessary to suppress overall resistance.

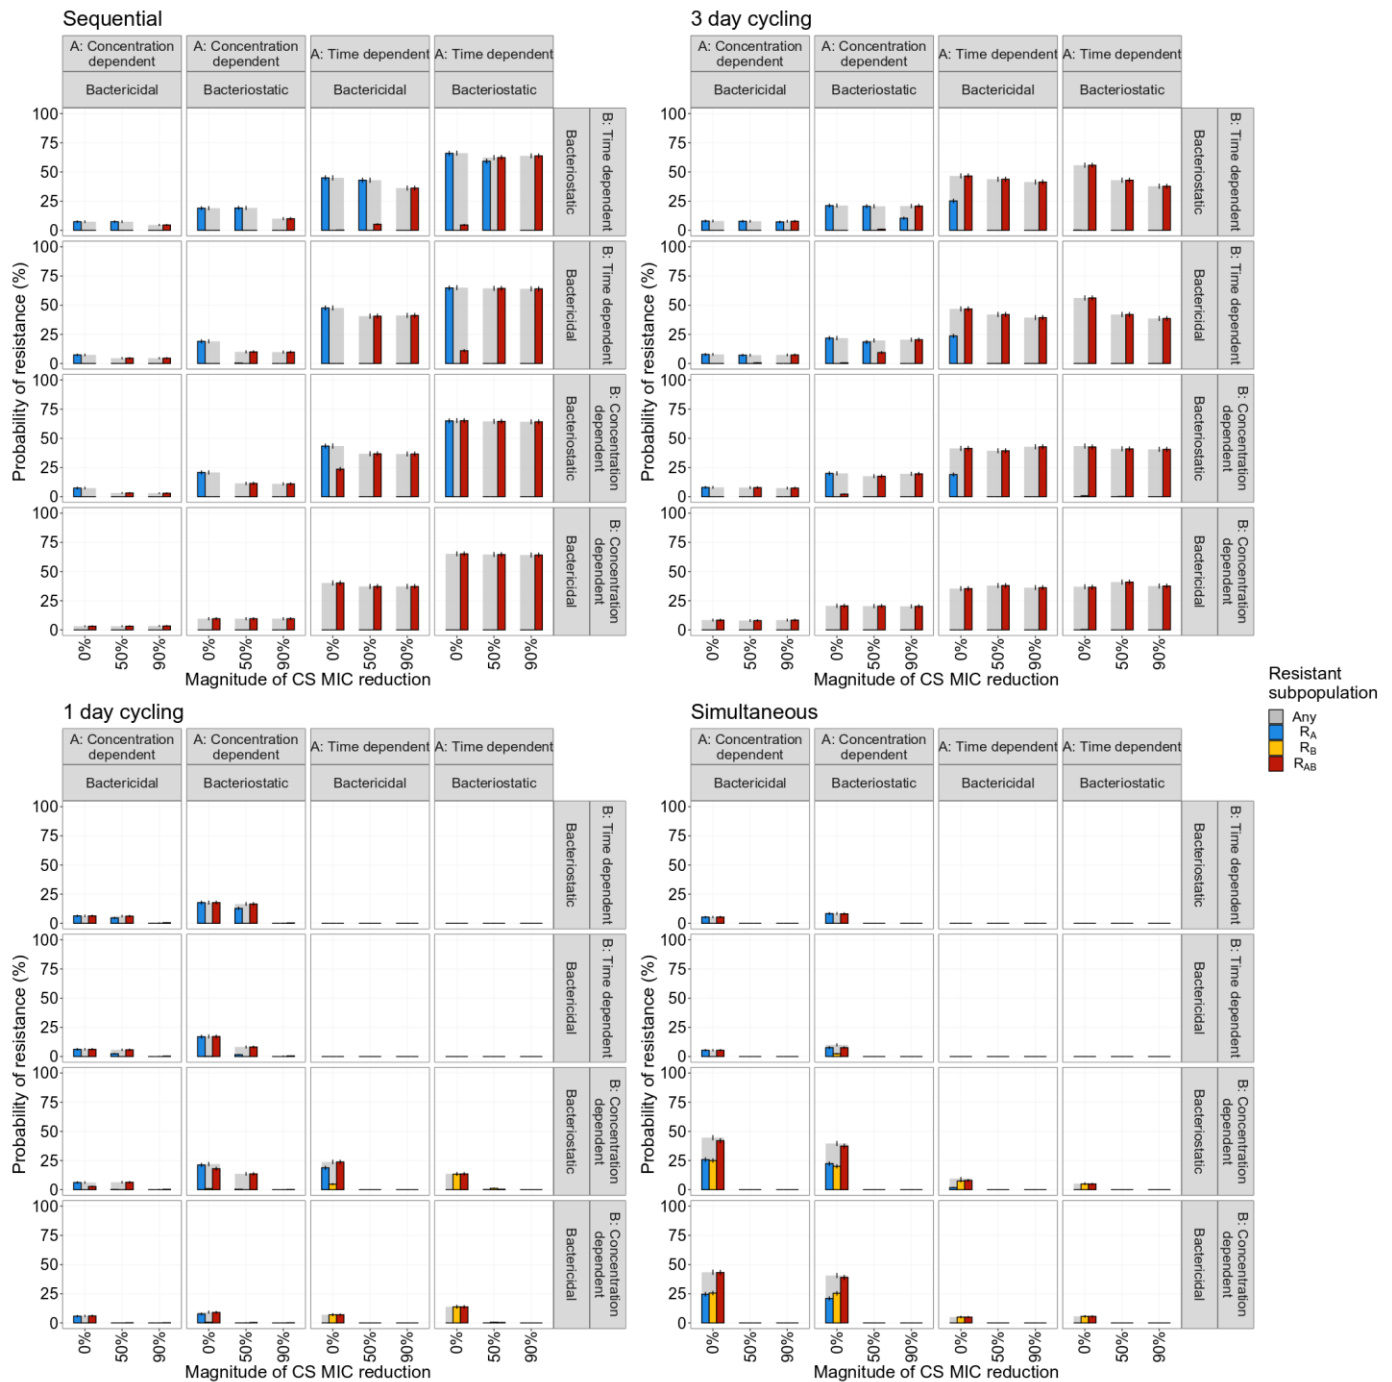

587

588 **Figure S3. The effect of using different antibiotic combinations during treatments in relation to different levels of collateral**  
 589 **sensitivity (CS) on the probability of resistance (PoR) at the end of treatment.** PoR was estimated at the end of treatment for  
 590 different treatment schedules with different antibiotic combinations. Subpopulation-specific PoR is indicated by different colour  
 591 and  $R_{Any}$ , defined as the presence of any resistant subpopulation, is indicated in grey. The error bars represent the standard error  
 592 of the estimation of PoR.

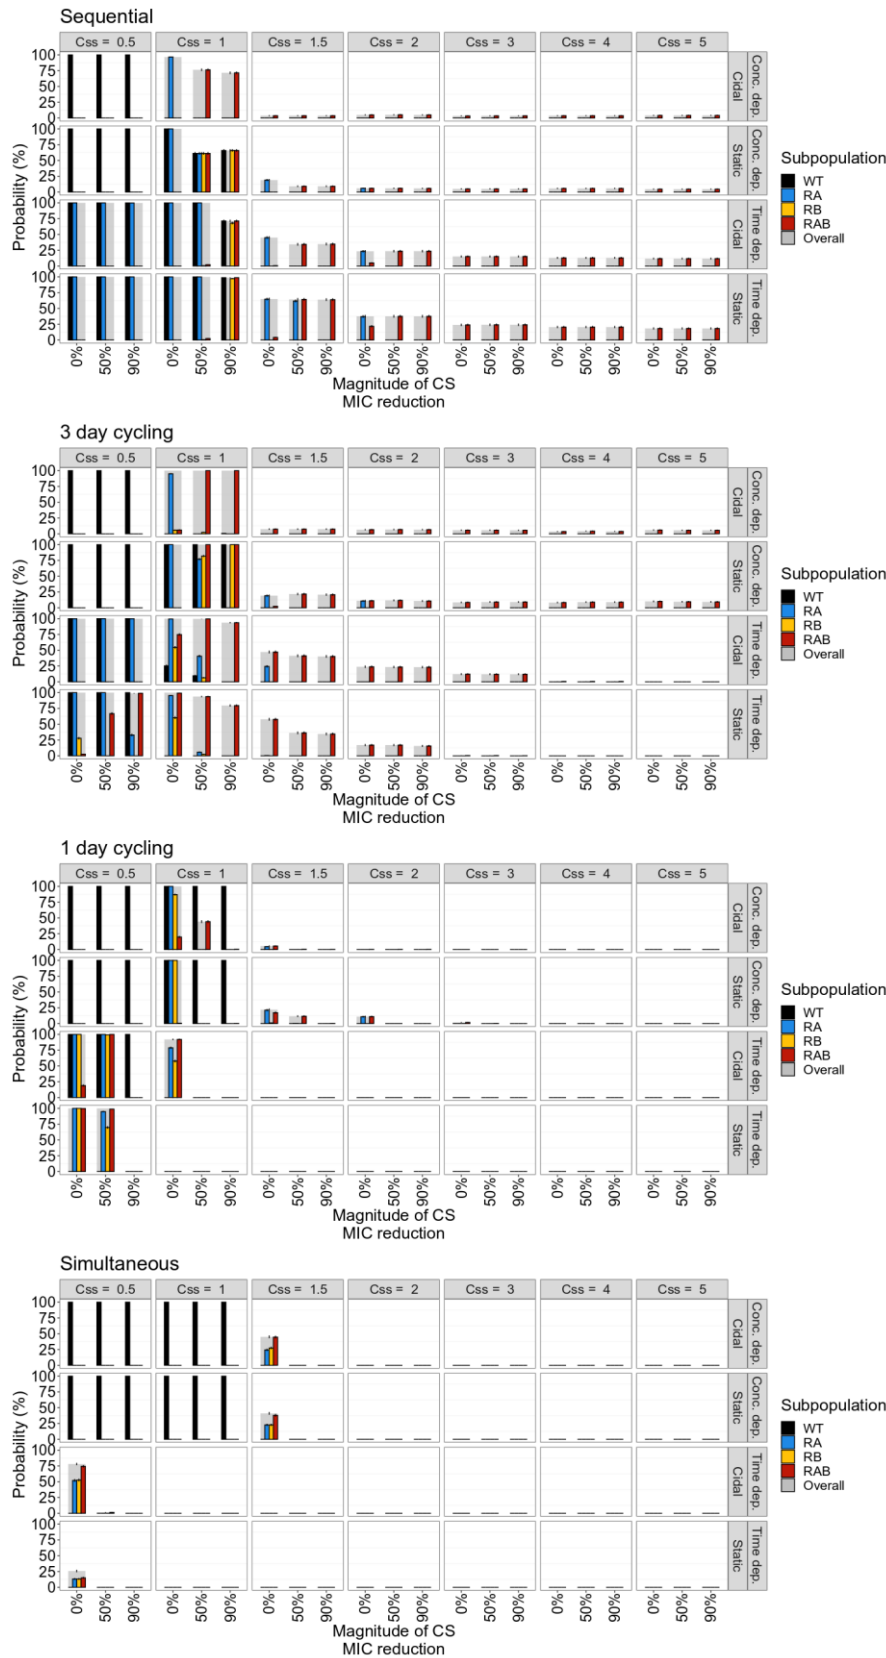

593

594

595

596

597

598

**Figure S4. The effect of antibiotic steady state concentrations ( $C_{ss}$ ) in relation to different levels of collateral sensitivity (CS) on the probability of resistance at the end of treatment (PoR).**  $C_{ss}$  was expressed as factor difference from the  $MIC_{WT}$ . PoR of  $R_{Any}$ , defined as the presence of any resistant subpopulation, was estimated at the end of treatment for treatments using different designs and antibiotic types (rows). Subpopulation-specific PoR is indicated by different colour and  $R_{Any}$  is indicated in grey. The error bars represent the standard error of the estimation of PoR.

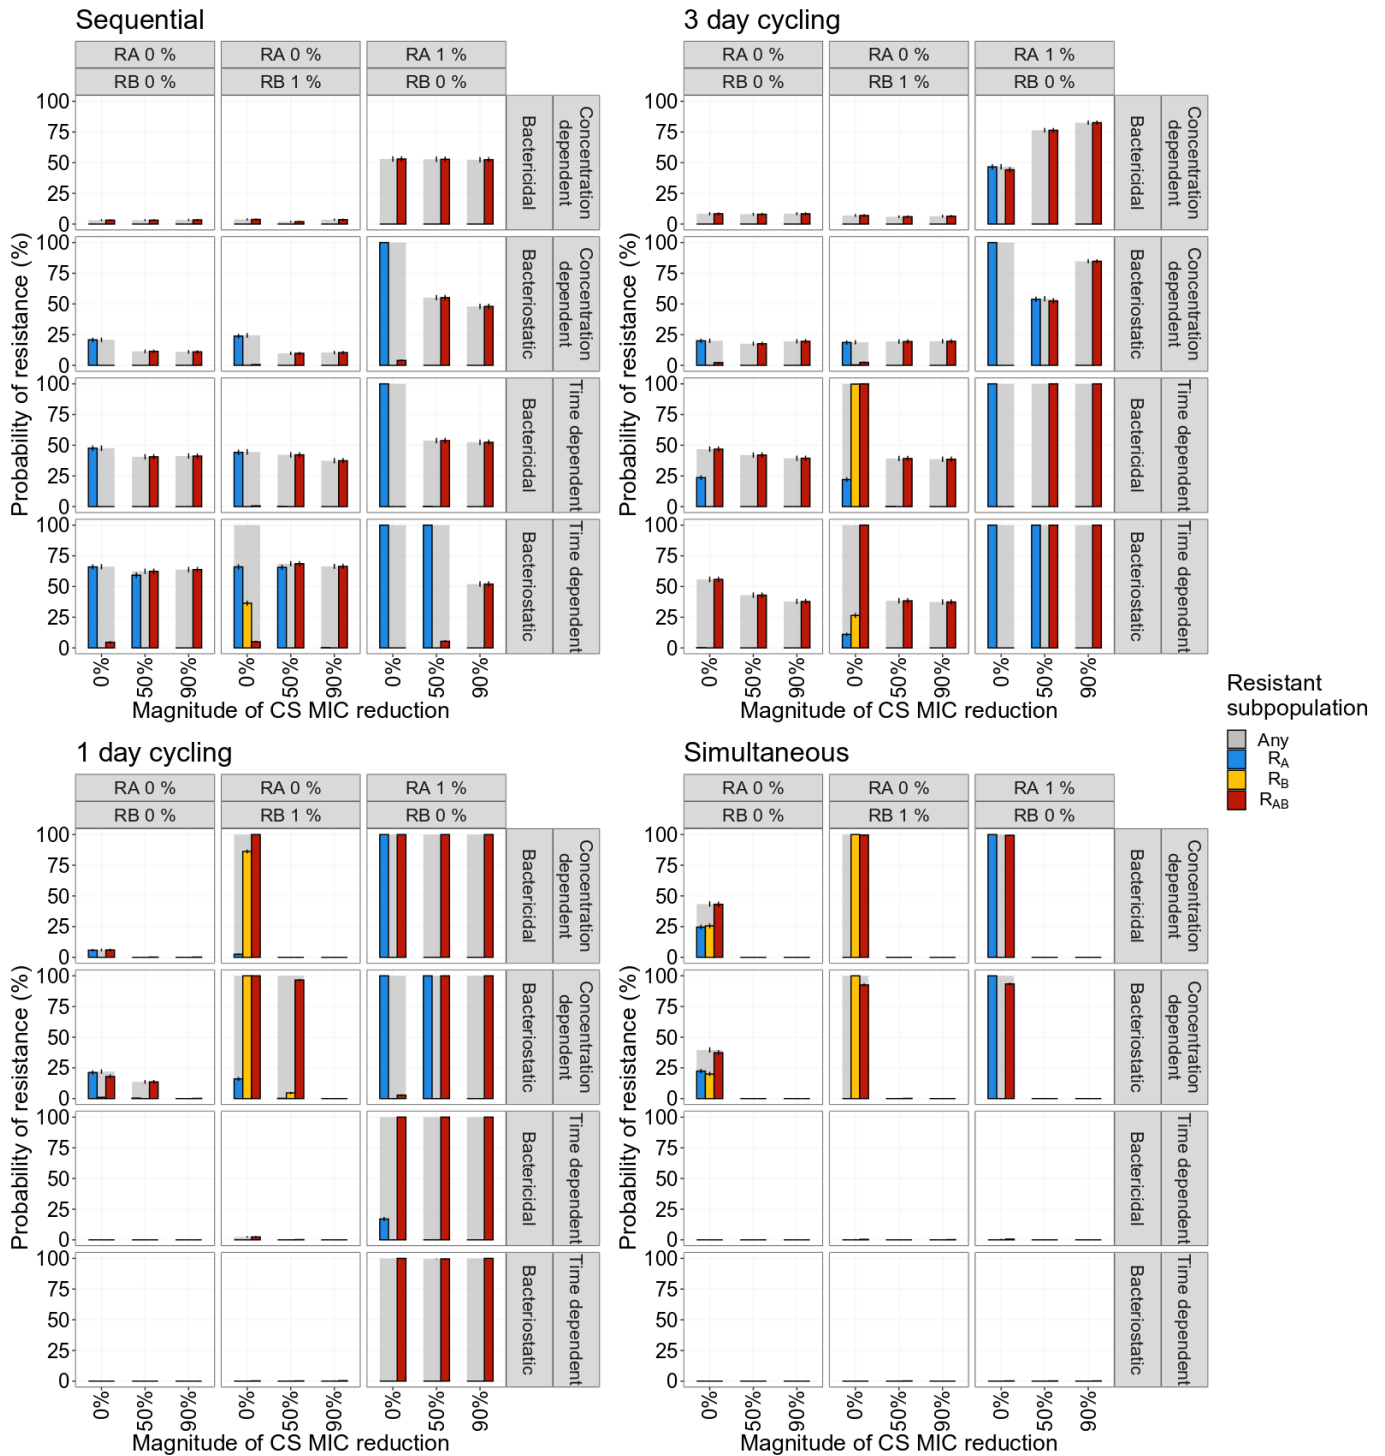

599

600 **Figure S5. The effect of pre-existing resistant mutants for different magnitudes of collateral sensitivity on the probability of**  
 601 **resistance (PoR).** PoR was estimated at the end of treatment for different scenarios of low levels of pre-existing resistance  
 602 (columns) and antibiotic types (rows). Subpopulation-specific probability of resistance is indicated by colour and PoR of R<sub>Any</sub>,  
 603 defined as the presence of any resistant subpopulation, is indicated in grey. The error bars represent the standard error of the  
 604 estimation of PoR.

605
