# Design principles of collateral sensitivity-based dosing strategies

Linda B. S. Aulin<sup>1\*</sup>, Apostolos Liakopoulos<sup>2</sup>, Piet H. van der Graaf<sup>1,3</sup>, Daniel E. Rozen<sup>2</sup>, J. G. Coen van Hasselt<sup>1\*</sup>

1. Leiden Academic Centre for Drug Research, Leiden University, Leiden, The Netherlands

2. Institute of Biology, Leiden University, Leiden, The Netherlands

3. Certara, Canterbury, United Kingdom

\*Corresponding authors:

Linda Aulin, l.b.s.aulin@lacdr.leidenuniv.nl, Leiden University, Einsteinweg 55, 2333 CC, Leiden, The Netherlands

Coen van Hasselt, coen.vanhasselt@lacdr.leidenuniv.nl, Leiden University, Einsteinweg 55, 2333 CC, Leiden, The Netherlands

|                                 |                                                                    |
|---------------------------------|--------------------------------------------------------------------|
| Abstract:                       | 150/150                                                            |
| Manuscript incl Method section: | 6404                                                               |
| Manuscript excl Method section: | 4353/6000                                                          |
| Figures:                        | 10                                                                 |
| Tables:                         | 0                                                                  |
| References:                     | 56                                                                 |
| Supplementary information:      | 5 Figures, 2 Tables                                                |
| Supplementary files :           | 1 .zip file                                                        |
| Keywords:                       | collateral sensitivity, pharmacodynamics, antimicrobial resistance |

## 28 Abstract

29 Collateral sensitivity (CS)-based antibiotic treatments, where increased resistance to one antibiotic leads to  
30 increased sensitivity to a second antibiotic, may have the potential to limit the emergence of antimicrobial  
31 resistance. However, it remains unclear how to best design CS-based treatment schedules. To address this problem,  
32 we use mathematical modelling to study the effects of pathogen- and drug-specific characteristics for different  
33 treatment designs on bacterial population dynamics and resistance evolution. We confirm that simultaneous and  
34 one-day cycling treatments could suppress resistance in the presence of CS. We show that the efficacy of CS-based  
35 cycling therapies depends critically on the order of drug administration. Finally, we find that reciprocal CS is not  
36 essential to suppress resistance, a result that significantly broadens treatment options given the ubiquity of one-way  
37 CS in pathogens. Overall, our analyses identify key design principles of CS-based treatment strategies and provide  
38 guidance to develop treatment schedules to suppress resistance.

## 42 Introduction

43 Antimicrobial resistance (AMR) is a worldwide health threat due to the reduction of clinically effective antibiotics.  
44 Current drug discovery pipelines of new-in-class antibiotic agents are insufficient to offset the emergence of new  
45 AMR<sup>1</sup>. Innovative strategies to reduce the rate that AMR develops are thus critically needed. Treatment with  
46 antibiotics in individual patients represents one important situation where *de novo* AMR may emerge<sup>2,3</sup>. However,  
47 current clinical antibiotic treatment strategies, *i.e.*, which types of antibiotics are included as well as timing and  
48 dosage, typically do not explicitly consider within-host emergence of AMR. Instead, current strategies used in clinical  
49 practise are primarily based on exposure targets that are associated with sufficient bacterial kill in preclinical studies,  
50 or with clinical outcomes in patient studies<sup>4</sup>. Thus, there is need for clinical dosing strategies specifically designed to  
51 suppress AMR emergence<sup>5</sup>.

52 Trade-offs associated with AMR are of increasing interest to design antibiotic dosing strategies that suppress the  
53 within-host emergence of AMR<sup>6</sup>. In this context, collateral sensitivity (CS), where resistance to one antibiotic leads to  
54 increased sensitivity to a second antibiotic, has been proposed as a potential strategy to suppress AMR<sup>7,8</sup>. CS has  
55 been characterized *in vitro*, typically by evolving AMR strains and then quantifying correlated changes in the  
56 sensitivity to other antibiotics<sup>9-12</sup>. CS effects have been characterized for several clinically relevant pathogens,  
57 including *Escherichia coli*<sup>9</sup>, *Pseudomonas aeruginosa*<sup>13</sup>, *Enterococcus faecalis*<sup>14</sup>, *Streptococcus pneumoniae*<sup>15</sup>, and  
58 *Staphylococcus aureus*<sup>16</sup>. CS relationships between antibiotics can either be one directional, where decreased  
59 sensitivity to one antibiotic show CS to a second antibiotic but not the reverse, or reciprocal, where decreased  
60 sensitivity to either of the antibiotics results in CS to the other. Reciprocal CS is often considered a prerequisite for  
61 effective CS-based treatments, but such relationships have been less frequently observed compared to one  
62 directional CS<sup>9-16</sup>.

63 CS-based treatment strategies can use different designs to combine antibiotics showing a CS-relationship, including  
64 simultaneous, sequential, or cyclic (alternating) administration. For example, consider a cycling drug strategy using  
65 two antibiotics showing reciprocal CS (Fig. 1). Initial treatment would start with antibiotic A. This leads to resistance  
66 to A and a corresponding increase in sensitivity to B. When treatment is switched to antibiotic B, the inverted  
67 selection pressure leads to the eradication of cells that are resistant to antibiotic A (due to CS), but possibly  
68 favouring any remaining cells that are resistant to B, but susceptible to antibiotic A. By cycling between the two

69 drugs to sequentially eliminate all cells that show reciprocal CS, complete eradication can be achieved. Although the  
70 conceptual strategies of CS-based treatments have been discussed<sup>6</sup>, it remains unclear when CS-based dosing  
71 strategies are most likely to be beneficial, and how to design specific multi-drug antibiotic dosing schedules based on  
72 CS. Furthermore, it is unclear how pathogen-specific factors, such as CS effect magnitude and directionality, fitness  
73 costs of resistance, and mutation rates, as well as pharmacological factors related to pharmacokinetics and  
74 pharmacodynamics for different drug types, can affect optimal dosing schedules.

75 Experimental studies *in vitro* are essential to characterize the incidence, evolvability and magnitude of CS, all of  
76 which are important but isolated components that may contribute to the success of CS-based treatments<sup>9–16</sup>.  
77 However, to translate *in vitro* CS findings to *in vivo* or clinical treatment scenarios, consideration of  
78 pharmacodynamic (PD) and pharmacokinetic (PK) factors is essential, as these determine the differential impact of  
79 different antibiotics on the concentration-dependent effects of bacterial growth, inhibition, and killing<sup>17,18</sup>. By  
80 affecting bacterial dynamics, antibiotic PK-PD can have a profound influence on resistance evolution, and are  
81 therefore key elements to design optimised CS-informed treatments. In addition, it is necessary to disentangle the  
82 respective impacts of these separate parameters. Doing so requires a highly controlled system, where each factor  
83 can be modified separately; this level of control cannot be established experimentally. To this end, a  
84 mathematical modelling approach can be highly valuable, as such models permit precise control of each factor.  
85 Additionally, mathematical models are important tools to integrate multiple biological and pharmacological factors  
86 contributing to treatment outcomes, including different PK parameters of specific antibiotics in patients, antibiotic-  
87 specific PD parameters, and pathogen specific characteristics such as strain fitness and the magnitude of CS effects.  
88 Thus, using a mathematical modelling approach allows us to address key questions relating to CS-based treatments  
89 that have yet to be fully answered.

90 A number of mathematical models have been developed to evaluate multi-drug therapies in relation to collateral  
91 effects often using shifts in MIC or other summary metrics as endpoints. These include deterministic<sup>19</sup> and Markov<sup>20</sup>  
92 models evaluating antibiotic cycling *in vitro* and *in silico*, which provide important insight into the importance of the  
93 design of the cycling regimen. Furthermore, a stochastic evolution model has been developed to assess the  
94 robustness of collateral sensitivity<sup>21</sup>. Despite the values of these models, they fail to characterise the bacterial  
95 dynamics underlying resistance evolution. Additionally, they do not include PK-PD relationships and lack

96 consideration of clinical PK, which are key factors when translating the findings into clinical dosing strategies.  
97 Udekwo and Weiss developed a deterministic PK-PD model to study clinically relevant cycling schedules for CS-  
98 informed treatments and evaluated their ability to delay emergence of antibiotic resistance<sup>22</sup>. This simulation study  
99 serves as an important step toward designing clinically effective CS-based treatments. However, to take further steps  
100 towards such treatments, there is a need for a more comprehensive evaluation of the impact of several  
101 pharmacological and pathogen-associated factors related to dosing schedule designs, as well as specifically evaluate  
102 the impact of CS effects on treatment outcomes in comparison to the situation without CS.

103 In the current study we aim to build on previously established models in order to determine if and when CS-based  
104 dosing schedules lead to suppression of within-host emergence of antibiotic resistance. We utilise a mathematical  
105 modelling approach to comprehensively study the influence of key pathogen-specific factors and the contribution of  
106 PK and PD properties to identify key design principles to inform rational design of antibiotic multi-drug dosing  
107 schedules that suppress AMR.

## 108 Methods

### 109 Model framework

110 A differential-equation based model, consisting of components accounting for antibiotic PK and PD, and associated  
111 bacterial population dynamics, was developed to study the impact of differences in pathogen- and drug-specific  
112 characteristics for different treatment strategies using two antibiotics, hereafter referred to as drug A ( $D_A$ ) and drug  
113 B ( $D_B$ ). As a foundation for our model development, we used a deterministic PK-PD model developed by Udekwo and  
114 Weiss<sup>22</sup>, which explores the impact of different multi-drug treatments on time to resistance development in the  
115 presence of CS. We advanced the model by incorporating mutations as random events to capture the stochasticity of  
116 resistance evolution. We integrated the different model components into a framework that allowed us to simulate  
117 antibiotic multi-drug treatments while altering drug- and pathogen-specific factors as a strategy to disentangle their  
118 impacts on resistance development.

### 120 *Pharmacokinetics*

121 A mono-exponential PK model was defined for both drugs  $D_i$ , where  $i = \{A,B\}$ , as follows:

$$122 \frac{dA_{D_i}}{dt} = -k_{e,D_i} \times A_{D_i} \quad (1)$$

$$123 t_{\text{half},D_i} = \frac{\ln(2)}{k_{e,D_i}} \quad (2)$$

$$124 C_{D_i} = \frac{A_{D_i}}{V_{D_i}} \quad (3)$$

125 where Equation 1 describes the change of the amount of  $D_i$  in plasma over time after intravenous administration,  
126  $k_{e,AB_i}$  is the elimination rate of  $D_i$ , which can also be expressed as a half-life ( $t_{\text{half},D_i}$ ) (Equation 2). The unbound plasma  
127 concentration ( $C_{D_i}$ ), which is the assumed driver of the antibiotic effect, is calculated using the  $V_{D_i}$ , the distribution  
128 volume of  $D_i$  with the assumption of negligible protein binding (Equation 3).

### 129 **Bacterial subpopulations**

130 A model for antibiotic sensitive and resistant subpopulations was defined, comprising a four-state stochastic hybrid  
131 ordinary differential equation (ODE) model, where each state represents a bacterial subpopulation with different  
132 antibiotic susceptibility towards  $D_A$  and  $D_B$ .

133 The model included an antibiotic sensitive bacterial subpopulation (WT) (Equation 4), one mutant subpopulation  
134 resistant to  $D_A$  but sensitive to  $D_B$  ( $R_A$ ) (Equation 5), one mutant subpopulation sensitive to  $D_A$  but resistant to  $D_B$  ( $R_B$ )  
135 (Equation 6), and one double mutant subpopulation resistant to both  $D_A$  and  $D_B$  ( $R_{AB}$ ) (Equation 7). The initial  
136 bacterial population was assumed to be homogeneous and in the sensitive WT state unless stated otherwise.

$$137 \frac{dWT}{dt} = WT \times k_{G,WT} \times E_{D,WT} - k_{WT,R_A} - k_{WT,R_B} \quad (4)$$

$$138 \frac{dR_A}{dt} = R_A \times k_{G,R_A} \times E_{D,R_A} + k_{WT,R_A} - k_{R_A,R_{AB}} \quad (5)$$

$$139 \frac{dR_B}{dt} = R_B \times k_{G,R_B} \times E_{D,R_B} + k_{WT,R_B} - k_{R_B,R_{AB}} \quad (6)$$

$$140 \frac{dR_{AB}}{dt} = R_{AB} \times k_{G,R_{AB}} \times E_{D,R_{AB}} + k_{R_A,R_{AB}} + k_{R_B,R_{AB}} \quad (7)$$

141 The above equations (Equation 4-7) describe the subpopulation specific rate of change for bacterial density, which is  
142 dependent on the bacterial density of subpopulation  $z$ , the subpopulation specific net growth ( $k_{G,z}$ ), the drug effect  
143 ( $E_{D,z}$ ), and mutation transition(s) ( $k_{z,M}$ ), if present.

## 144 **Resistance mutation**

145 Resistance evolution was included as stochastic mutation process. This process was modelled using a binomial  
146 distribution  $B$  with a mutation probability equal to the mutation rate ( $\mu$ ). The number of bacteria mutated per time  
147 step  $k_{z,M}$  depended on the number of bacteria available for mutation ( $n_z$ ), *i.e.*, the bacterial subpopulation density of  
148 subpopulation  $z$  multiplied by the infection volume  $V$ , for mutation at time  $t$  (Equation 8). Double resistant mutants  
149 evolved through two mutation steps.

$$150 \quad k_{z,M} = \frac{B(n_z, \mu)}{V} \quad (8)$$

## 151 **Pharmacodynamic effects**

152 Drug effects on bacterial subpopulations (Equation 4-7) were assumed to be additive and the total drug effect for  
153 each subpopulation  $z$  ( $E_{D,z}$ ) was implemented as follows (Equation 9):

$$154 \quad E_{D,z} = 1 - (E_{D_{A,z}} + E_{D_{B,z}}) \quad (9)$$

155 Here, antibiotic-mediated effects were implemented according to a PD model developed by Regoes *et al.* <sup>17</sup>, where  
156 the effect of the  $i^{\text{th}}$  antibiotic on bacterial subpopulation  $z$  ( $E_{D_{i,z}}$ ) was related to the unbound drug concentration  
157 ( $C_{D,i}$ ) according to Equation 10.

$$158 \quad E_{D_{i,z}} = \frac{(1 - G_{\min, D_i} / k_{G_{\max, z}}) \times \left( \frac{C_{D,i}}{\text{MIC}_{D_i, z}} \right)^{\text{Hill}_{D_i}}}{\left( \frac{C_{D,i}}{\text{MIC}_{D_i, z}} \right)^{\text{Hill}_{D_i}} - \frac{G_{\min, D_i}}{k_{G_{\max, z}}}} \quad (10)$$

159 where  $G_{\min, D_i}$  represents the maximal killing effect for the  $D_i$ ,  $k_{G_{\max, z}}$  is the subpopulation-specific maximal growth  
160 rate,  $\text{Hill}_{AB_i}$  is the shape factor of the concentration-effect relationship, and  $\text{MIC}_{D_i, z}$  is the subpopulation-specific  
161 MIC of  $D_i$ . This multi-parameter model allows for the description of the concentration-effect relationship of different  
162 shapes in relation to the subpopulation-specific MIC.

163 Sensitive bacteria were defined as having a MIC of 1 mg/L ( $\text{MIC}_{\text{WT}}$ ) and resistant as 10 mg/L ( $\text{MIC}_{\text{R}}$ ). Because the  
164 antibiotic concentrations are expressed as folds times  $\text{MIC}_{\text{WT}}$ , the absolute value of  $\text{MIC}_{\text{WT}}$  is arbitrary. However, the  
165 ratio between  $\text{MIC}_{\text{WT}}$  and  $\text{MIC}_{\text{R}}$  is of relevance. A tenfold increase was chosen to represent a significant increase for a  
166 biologically plausible scenario. Resistance-related CS effects were included on the two single resistant mutants ( $R_A$

167 and  $R_B$ ), and were implemented as a proportional reduction ( $CS_A$  and  $CS_B$ ) of the MIC of the sensitive wild type  
168 bacteria ( $MIC_{WT}$ ). The double resistant mutant ( $R_{AB}$ ) was fully resistant ( $MIC = MIC_R$ ) to both antibiotic A and B, and  
169 did not have any collateral effects. The subpopulation- and antibiotic-specific MICs are stated below:

$$\begin{aligned} 170 \quad MIC_{D_A,WT} &= MIC_{WT} & \text{and} & & MIC_{D_B,WT} &= MIC_{WT} \\ 171 \quad MIC_{D_A,R_A} &= MIC_R & \text{and} & & MIC_{D_B,R_A} &= MIC_{WT} \times CS_B \\ 172 \quad MIC_{D_A,R_B} &= MIC_{WT} \times CS_A & \text{and} & & MIC_{D_B,R_B} &= MIC_R \\ 173 \quad MIC_{D_A,R_{AB}} &= MIC_R & \text{and} & & MIC_{D_B,R_{AB}} &= MIC_R \end{aligned}$$

174

### 175 ***Growth rates and fitness effects***

176 The maximal net growth rate ( $k_{Gmax}$ ) represents the maximal net growth of the wild type bacteria in the exponential  
177 growth phase. We considered resistance-associated fitness costs for the different mutant subpopulations. The fitness  
178 cost was incorporated using the factor  $F_{fit}$ , which introduced a fractional reduction of  $k_{Gmax}$  for each resistance  
179 mutation. Thus, each subpopulation is associated with a specific maximal net growth rate ( $k_{Gmax,z}$ ), determined by the  
180 subpopulation-specific fitness, and was implemented according to Equation 11.

$$181 \quad k_{Gmax,z} = k_{Gmax} \times F_{fit}^{Nz} \quad (11)$$

182 where  $F_{fit}^{Nz}$  is the fitness cost factor per mutation, and  $Nz$  is the subpopulation-specific number of mutations ( $Nz = 0,$   
183 1 or 2).

184 The subpopulation-specific net growth in the absence of antibiotic ( $k_{G,z}$ ) was implemented according to Equation 12.

$$185 \quad k_{G,z} = k_{Gmax,z} \times \left(1 - \frac{WT+R_A+R_B+R_{AB}}{B_{max}}\right) \quad (12)$$

186 where  $B_{max}$  is the systems maximum carrying capacity, and  $WT, R_A, R_B, R_{AB}$  represent the bacterial densities of the four  
187 different subpopulations, respectively.

188

### 189 Pathogen- and infection-specific parameters

190 The maximal growth rate ( $k_{Gmax}$ ) of the hypothetical pathogen was  $0.7 \text{ h}^{-1}$ , thus representing a doubling time of one  
191 hour. The infection-specific parameters were chosen to represent a human bacteraemia, thus a typical human blood  
192 volume of five litres was used as the infection site volume<sup>23</sup>. An initial bacterial density of  $10^4$  colony forming units



193 (CFU)/mL was used to represent an early stage of an established infection<sup>24</sup>. A system carrying capacity limitation  
194 ( $B_{\max}$ ) of  $10^8$  CFU/mL<sup>24</sup> was implemented according to Equation 12. When the maximum carrying capacity is reached,  
195 the net growth of the total bacterial population is zero, resulting in stationary phase. During this phase bacterial  
196 replication continues but is offset by bacterial death at the same rate, thereby still allowing for resistance mutations  
197 to occur. Resistance mutation rates of  $10^{-6}$  and  $10^{-9}$  mutations/base pair/hour were chosen to represent a high and a  
198 moderate mutation rate scenario, respectively<sup>25</sup>.

## 199 Drug-specific parameters

200 The two hypothetical antibiotics used for the simulations ( $D_A$  and  $D_B$ ) have identical one-compartmental PK with  
201 distribution volumes of one litre, five-hour half-lives, and no protein binding. Their half-lives were selected to  
202 represent antibiotics with clinically relevant short half-lives, thereby rapidly reaching steady-state concentrations  
203 with minimal accumulation. The drugs were administered as intravenous bolus doses twice daily over a treatment  
204 duration of two weeks. Several different dosing regimens were simulated including monotherapy, sequential non-  
205 repetitive dosing, one- and three-days repeated cycling regimens, and simultaneous dosing. Here, sequential non-  
206 repetitive dosing represents a multi-drug treatment using  $D_A$  for the first seven days and then switching to  $D_B$  for the  
207 remaining seven days of the treatment. The repeated cycling regimens represent multi-drug treatments starting with  
208  $D_A$  for the duration of the cycling interval (*i.e.*, one or three days), then switching to  $D_B$  for the same duration, and  
209 then back to  $D_A$ , continuing the repeated cycling until the end of treatment. For sequential and repeated cycling  
210 treatments  $D_A$  was always used as the starting drug. The doses used were obtained by calculating the required dose  
211 to achieve appropriate average steady state concentration ( $C_{ss}$ ) relative to the  $MIC_{WT}$ . The lowest dose (using 0.5 x  
212 MIC increments) that gave kill or stasis of the WT bacteria within the 24 hours of treatment, but allowed for  
213 resistance development during monotherapy, was selected for all dosing regimens except for the simultaneous  
214 dosing, for which the dose for the individual antibiotics were reduced by half in order to allow for resistance  
215 development. Four different PD types were included using different combinations of representative parameter  
216 values of Hill (driver of antibiotic effect) and  $G_{\min}$  (type of antibiotic effect). The driver of the antibiotic effect, which  
217 is reflected by the steepness of the concentration-effect relationship (Hill), where shallow relationships are  
218 associated with time-over-MIC-dependency (Hill = 0.5) and steep relationship with concentration-dependency (Hill =

219 3). The type of antibiotic effects are commonly divided into bacteriostatic ( $G_{\min} = -1$ ) or bactericidal ( $G_{\min} = -3$ ). The  
220 corresponding PK-PD relationship of the four different antibiotic types is shown in Fig. 3.

### 221 Simulation scenarios

222 An initial set of dose-finding simulations revealed that monotherapy required  $C_{ss}$  equal to 1.5 mg/L ( $1.5 \times \text{MIC}_{\text{WT}}$ ) to  
223 achieve killing of the WT while allowing for emergence of resistance in the absence of CS, regardless of the drug type  
224 used (Supplementary Fig. 1). These dosing conditions allow us to evaluate the effect of CS for the majority of the  
225 simulated treatments. However, for the treatments where antibiotics were dosed simultaneously, half of the dose  
226 ( $C_{ss}$  0.75 mg/L) was used in order to keep the total dose constant, and to allow for resistance emergence in the  
227 absence of CS and comparable to non-simultaneous dosing regimens.

228 We used a systematic simulation strategy to study the impact of CS, fitness cost, mutation rate, and initial  
229 subpopulation heterogeneity in antibiotic sensitivity on the probability of resistance (PoR) development for different  
230 treatments. An overview of all simulated scenarios can be found in Supplementary Table 1. We simulated treatments  
231 using two same-type antibiotics ( $G_{\min,A} = G_{\min,B}$  and  $\text{Hill}_A = \text{Hill}_B$ ) for scenarios without CS as well as in the presence of  
232 one directional and reciprocal CS in the magnitude of 50% or 90% (2 or 10-fold) reduction of the sensitive MIC  
233 (Supplementary Table 1, Scenario 1 and 2). For these scenarios the resistance was assumed to occur without any  
234 fitness cost, thus allowing us to evaluate CS-specific effects on PoR. We also simulated a set of treatment scenarios  
235 using two different antibiotic types in the presence or absence of CS (Supplementary Table 1, Scenario 3). To assess  
236 the impact of therapeutic window of antibiotics, as reflected by the fold-difference of steady state concentration  
237 ( $C_{ss}$ ) to the  $\text{MIC}_{\text{WT}}$ , we simulated different dosing levels resulting in a range of  $C_{ss}$  of  $0.5\text{-}5 \times \text{MIC}_{\text{WT}}$  (Supplementary  
238 Table 1, Scenario 4). Additionally, we simulated same-type treatment scenarios covering a wide range of fitness costs  
239 (10% to 50% fitness cost per mutation compared to the wild type) implemented as a growth rate reduction  
240 (Supplementary Table 1, Scenario 5). In order to better understand the interplay between CS and fitness cost we  
241 simulated these scenarios with and without CS. We further investigated how low levels of pre-existing resistance  
242 (1%) towards either  $\text{AB}_A$  or  $\text{AB}_B$  affected the PoR at the end of treatment for different dosing regimens  
243 (Supplementary Table 1, Scenario 6). Finally, we examined the effect of increased mutation rates on resistance  
244 development (Supplementary Table 1, Scenario 7).

245 Each simulated scenario was realized 500 times ( $n$ ), thus representing 500 virtual patients for which the within-  
246 patient resistance development was assessed. For each scenario we evaluated different multi-drug treatments  
247 regimens, including within-patient cycling and simultaneous administration. We note that most previously  
248 conducted studies investigating the clinical utility of antibiotic cycling and mixing to suppress AMR have evaluated  
249 stewardship strategies at a community level<sup>26–28</sup>, *e.g.*, between patients within a hospital ward. However, community  
250 level strategies are conceptually different from the within-patient multi-drug treatment strategies we investigate in  
251 this analysis. Therefore, the results we derive from our simulations are not directly comparable to the findings from  
252 such epidemiological studies.

### 253 Evaluation metrics

254 We computed the probability of resistance (PoR), which was defined as resistant bacteria reaching, or exceeding, the  
255 initial bacterial density of  $10^4$  CFU/mL at the end of treatment, for each subpopulation separately (Equation 13)

$$256 \text{PoR}_z = \frac{n_{R,z}}{n} \quad (13)$$

257 where  $n_{R,z}$  denotes the number of patients having resistant bacteria of subpopulation  $z$  at the end of treatment  
258 (Equation 14):

$$262 n_{R,z} = \sum_{k=1}^n \mathbf{1}_{x_{z,k} \geq 10^4 \text{ cfu/mL}} \quad (14)$$

260 where  $\mathbf{1}$  denotes the indicator function and  $x_{z,k}$  denotes the bacterial density of subpopulation  $z$  at the end of  
261 treatment of patient  $k$ .

263 We also calculated the PoR for the case where any, *i.e.*, one or more, resistant subpopulation(s) exceeded the  
264 resistance cut-off ( $R_{\text{Any}}$ ).

265 The standard error (SE) of the PoR was calculated according to Equation 15.

$$266 \text{SE} = \sqrt{\frac{\text{PoR}(1-\text{PoR})}{n}} \quad (15)$$

267 Software and model code

268 All analyses were conducted in R version 4.0.5, using the ODE solver package RxODE (version 1.0.0-0)<sup>29,30</sup>. The  
269 associated model code is available at <https://github.com/vanhasseltlab/CS-PKPD><sup>31</sup>.

## 270 Results

271 Drug type and treatment schedule influence the probability of resistance

272 We simulated multi-drug antibiotic treatments using two antibiotics of the same type, with either no (0%) or  
273 reciprocal CS (50 or 90% decrease comparing to  $MIC_{WT}$ ). We show that the impact of reciprocal CS on resistance  
274 dynamics is dependent on the simulated drug type and dosing regimen (Fig. 4). In our simulations, treatments with  
275 concentration-dependent antibiotics could achieve full CS-based resistance suppression for dosing schedules using  
276 one-day cycling interval (Fig. 4C, 4G) or simultaneous administration (Fig. 4D, 4H). A 50% MIC reduction was  
277 sufficient to achieve this effect for all of the four treatments, which is relevant in light of experimental results  
278 consistent with these CS magnitudes<sup>15,16,20,32,33</sup>. Treatments using time-dependent antibiotics dosed according to  
279 these schedules (Fig. 4K, 4L, 4O, 4P) were efficient in fully suppressing resistance with or without CS. Full resistance  
280 suppression was not achieved by any of the other treatment schedules tested. Although none of the CS-based  
281 treatments dosed according to the three-day cycling regimen managed to fully suppress resistance, the ones using  
282 time-dependent antibiotics (Fig. 4J, 4N) did show reduced PoR in the presence of CS. For these treatments, the effect  
283 of CS was most prominent for bacteriostatic antibiotics (Fig. 4N) where a CS magnitude of 90% resulted in a decrease  
284 of the PoR of 12.6% for  $R_{Any}$ . Importantly, we also find that for some treatments the presence of CS was not only  
285 unable to fully suppress resistance, but favoured the formation of double resistant mutants (Fig. 4F, 4I, 4M).

286 Directionality of CS effects influence the probability of resistance

287 We next sought to determine if reciprocity is a requirement for CS-based treatments to suppress *de novo* resistance.  
288 We find that bactericidal and bacteriostatic drugs showed the same overall behaviour for treatment outcomes when  
289 tested in relation to CS directionality (Supplementary Fig.2). We specifically focus on the one-day cycling and  
290 simultaneous treatment that appeared to be most successful in fully suppressing resistance for reciprocal CS. We find  
291 that for the one-day cycling regimen the presence of one directional CS for the second administered antibiotic ( $D_B$ )  
292 is sufficient to fully suppress resistance development. This is illustrated for treatments using concentration-

293 dependent bacteriostatic antibiotic in Fig. 5. In this scenario, one directional CS results in resistance levels close to  
294 the reciprocal scenario (*e.g.*, one directional 50% CS resulted in 0.4% PoR of  $R_{Any}$  for bacteriostatic (Fig. 5A) vs 0% for  
295 reciprocal CS (Fig.5B)). In contrast, when CS is only present for the first antibiotic administered ( $D_A$ ), we found  
296 resistance levels close to the scenario without any CS (PoR 11.5% (Fig. 5D) vs 12.4% (Fig. 5C)). Overall, these results  
297 suggest that when using a drug-pair without reciprocity, the order of administration has a large impact on treatment  
298 success and that therapy should be initiated with the antibiotic for which there is no CS. This strategy allows for  
299 evolution and growth of  $R_A$  on the first day, while  $R_B$  is suppressed by  $D_A$ . When the selection is inverted on day two,  
300 the low levels of  $R_A$  are effectively killed by  $D_B$  in the presence of CS. In the absence of CS towards  $D_B$ ,  $R_A$  will reach  
301 high levels, which can lead to further evolution of  $R_{AB}$ . When simultaneous administration of concentration-  
302 dependent antibiotics is used, we found that reciprocity is necessary to fully suppress resistance, as one directional CS  
303 will only suppress resistance for the resistant subpopulation which shows CS (Fig. 5A and 5B). However, one  
304 directional CS did reduce the PoR for  $R_{Any}$  by approximately 50% ( $\Delta$ PoR -19.6% and -19.2% for  $CS_A$  and  $CS_B$ ,  
305 respectively) for both of these treatments.

306

307 Administration sequence and antibiotic type influence resistance suppression

308 As CS does not only occur between antibiotics of the same type, it is important to understand how the  
309 administration sequence of different-type antibiotics affects resistance evolution. Our results for one-day cycling and  
310 simultaneous schedules demonstrated that the suppression of *de novo* resistance was mainly driven by the first  
311 administered antibiotic ( $D_A$ ) for all non-simultaneous regimens (Supplementary Fig. 3), highlighting the importance  
312 of drug sequence. In line with our findings for multi-drug treatments using same-type antibiotics (Fig. 4), resistance  
313 was fully suppressed from CS only when using one-day cycling or simultaneous administration dosing regimens.  
314 Particularly for one-day cycling regimens (Fig. 6), initiating treatment with a time-dependent antibiotic was more  
315 effective at suppressing resistance in the presence of reciprocal CS compared to the initial administration of a  
316 concentration-dependent antibiotic.

317

318 CS-based multi-drug treatments show greatest promise for antibiotics with a narrow therapeutic  
319 window

320 Although many antibiotics are well-tolerated and can be dosed well above the MIC of susceptible strains others, *e.g.*,  
321 aminoglycosides, display a narrow therapeutic window due to toxicity<sup>34–36</sup>. Understanding the relationship between  
322 average steady-state concentrations ( $C_{ss}$ ) and the impact of CS on *de novo* resistance development would help  
323 identify in which clinical scenarios CS could be exploited to improve treatment. To this end, we simulated a set of  
324 dosing regimens (using same-type antibiotics) resulting in  $C_{ss}$  ranging between 0.5-5 x  $MIC_{WT}$ . These simulations  
325 revealed that CS has the greatest impact on  $R_{Any}$  for  $C_{ss}$  close to the  $MIC_{WT}$  (Fig. 7 and Supplementary Fig. 4). Most  
326 treatments showing a benefit of CS lost the advantage when the  $C_{ss}$  exceeded 1.5 x  $MIC_{WT}$ . The only exception was  
327 one-day cycling treatment using concentration-dependent bacteriostatic drugs, which retained an advantage up to  
328  $C_{ss}$  of 2 x  $MIC_{WT}$  (Fig. 7G).

329 Fitness cost of antibiotic resistance can contribute to the success of CS-based treatments

330 Resistance evolution is commonly associated with fitness costs<sup>37</sup>. We studied the impact of different levels of fitness  
331 cost on the suppression of *de novo* resistance development (Fig. 8). Fitness cost was included as a fractional  
332 reduction of growth per mutation, thereby doubly penalising the double resistant mutant  $R_{AB}$ . In the absence of CS,  
333 fitness cost below 50% per mutation had little impact ( $|\Delta PoR| \geq 5\%$ ) on  $R_{Any}$  for most treatment scenarios. However,  
334 when concentration-dependent bactericidal drugs were dosed simultaneously the presence of fitness costs slightly  
335 increased the PoR (maximum  $\Delta PoR$  10.2 %). The presence of fitness cost increased the impact of CS on PoR the  
336 three-day cycling regimen using time dependent antibiotics (Fig. 8J and 8N), which failed to fully suppress resistance  
337 in the presence of fitness cost-free CS. The fitness cost generating the largest impact of CS for these treatments on  
338 PoR was 40% and 50% cost per mutation when treated with bacteriostatic ( $\Delta PoR$  -48.4) and bactericidal ( $\Delta PoR$  -  
339 42.8%) drug, respectively.

340 CS-based simultaneous treatment designs suppress pre-existing resistance

341 The presence of rare pre-existing resistant cells in the bacterial population establishing an infection is clinically  
342 associated with antibiotic-treatment failure<sup>38</sup>. We here studied if CS-based dosing schedules can be used to eradicate  
343 such a heterogeneous population (Fig. 9 and Supplementary Fig. 5). In the absence of CS, most of the simulated

344 treatment scenarios resulted in a higher probability of the expansion and fixation of pre-existing resistant sub-  
345 populations. As with *de novo* resistance and cycling regimens, the benefit of reciprocal CS was only apparent when  
346 resistance was towards the second antibiotic (subpopulation  $R_B$ ). This is illustrated with the one-day cycling  
347 treatments shown in Fig.9, where all CS-based treatments could suppress PoR for pre-existing  $R_B$ , but failed for all  
348 with pre-existing  $R_A$ . For three-day cycling regimens and pre-existing resistance towards the first antibiotic, CS was  
349 shown to increase the PoR for  $R_{AB}$  (Supplementary Fig. 5). In the presence of CS, all simultaneously dosed treatments  
350 were effective in fully suppressing resistance regardless of pre-existing resistance (Supplementary Fig. 5).

351  
352 The combined effect of CS and mutation rate on resistance development differs between  
353 treatments

354 Because some antibiotic treatments can enhance the genome-wide mutation rate in pathogenic bacteria <sup>39</sup>, we  
355 included a set of simulations with higher mutation rates than  $10^{-9}$  mutations/bp/h ( $10^{-8}$ - $10^{-6}$  mutations/bp/h). We  
356 show that the impact of mutation rate on the PoR was dependent on the combination of treatment design and the  
357 antibiotic type used, especially in the presence of CS (Fig. 10). The largest impact of the interaction between CS and  
358 mutation on PoR was found for the extremes of the antibiotic switching time, *i.e.*, one-day cycling and sequential  
359 treatment design (maximum  $\Delta$ PoR -57.8% and -52.4%, respectively). In the absence of CS, an increased mutation  
360 rate generally led to an increased PoR, with the exception of simultaneous administration of time-dependent  
361 antibiotics, which actually resulted in full suppression of resistance regardless of CS and mutation rate. For  
362 sequential treatments using time-dependent antibiotics with reciprocal CS (Fig.10I, 10M), the highest PoR was  
363 observed at a mutation rate of  $10^{-7}$  mutations/bp/hour, and decreased at higher mutation rates. For all mutation  
364 rates and in the presence of CS, simultaneous treatments suppressed resistance.

## 365 366 Discussion 367

368 Our theoretical analysis shows that CS can be exploited to design treatment schedules that suppress within-host  
369 development of antibiotic resistance, with CS-based treatments holding the most potential for antibiotics with  
370 narrow-therapeutic windows. Our simulations indicated that several previously unrecognised factors need to be

371 considered to ensure optimal design of CS-based dosing regimens, which include antibiotic PD characteristics, the  
372 magnitude and reciprocity of CS effects, and the effect of fitness cost of antibiotic resistance mutations. In addition,  
373 we found that antibiotic sequence has strong impact on the success of CS-based cycling treatments. An overview of  
374 the main insights and derived design principles we obtained can be found in Supplementary Table 2.

376 CS-based dosing schedules have mainly considered reciprocal CS scenarios, where resistance against one antibiotic  
377 leads to increased sensitivity to a second antibiotic and vice versa<sup>12,16</sup>. We show, however, that one directional CS  
378 can be sufficient to suppress resistance. For a one-day cycling regimen, the one-directional CS effects were nearly  
379 identical to the scenario that considered reciprocal CS (Fig. 5A vs 5B), but only when bacteria showed CS to the  
380 second drug administered. When CS was only present for the first antibiotic ( $D_A$ ) (Fig. 5D), initial bacterial growth  
381 was extensive, thus leading to increased risk of the double resistant subpopulation emerging. Because one-  
382 directional CS relationships are much more common than reciprocal CS relationships<sup>9-16</sup>, this significantly expands  
383 the number of clinical scenarios for which effective CS-based treatments can be designed.

384 We find that CS-based treatments show the greatest promise for antibiotics with a narrow therapeutic window. The  
385 therapeutic window of an antibiotic is defined by the drug exposure, or concentration range, leading to sufficient  
386 efficacy without associated toxicity. In the majority of our simulations, we have studied dosing schedules leading to  
387 an antibiotic steady state concentrations ( $C_{ss}$ ) of  $1.5 \times MIC_{WT}$  (or  $0.75 \times MIC_{WT}$  for simultaneous dosing regimens),  
388 which led to complete killing of the sensitive population but did allow emergence of resistance to occur. This  
389 concentration can be considered to reflect a narrow-therapeutic window antibiotic, *e.g.*, where the antibiotic  
390 concentration required for bacterial killing is closer to the MIC because of occurrence of (severe) toxicities at higher  
391 concentrations. Indeed, for concentrations (much) higher than the MIC, or simultaneously administering two drugs  
392 above the MIC, the benefit of CS rapidly disappears (Fig. 7). This means that especially for antibiotics with a narrow  
393 therapeutic window such as polymyxins or aminoglycosides, exploiting CS-based dosing schedules offers significant  
394 opportunities for successful antibiotic treatment while minimizing both the risks of antibiotic-related toxicity and *de*  
395 *novo* antibiotic-resistance development. Additionally, for simultaneously administered antibiotics, the presence of  
396 CS could provide the possibility to lower the dosage of the individual antibiotics without decreasing efficacy.

397 Cycling based dosing regimens are frequently discussed as a strategy to improve antibiotic treatment when CS  
398 occurs. In our simulations, we show that for one-day cycling treatments antibiotic type (Fig. 6), directionality of CS



399 (Fig. 5), and the identity of any pre-existing resistance subpopulation (Fig. 9) should be considered when choosing  
400 which drug to administer first. We, specifically, show that the type of the first administered antibiotic had a larger  
401 impact on the PoR compared to the type of the second administered antibiotic. The presences of CS to the second  
402 administered antibiotic had a greater effect PoR compared to CS to the first administered antibiotic. In the case of  
403 pre-existing resistance, the PoR was smaller if there was pre-existing resistance to the second administered drug  
404 compared to the first antibiotic. These findings are consistent with previous studies showing that the probability of  
405 resistance is influenced by the sequence of antibiotics<sup>40</sup>, and optimized cycling sequences outperformed random  
406 drug cycling regimens<sup>14</sup>. Additionally, we show that one-day cycling outperforms a three-day cycling interval, both in  
407 the presence and absence of CS. This is in agreement with previous *in vitro* studies showing an advantage of shorter  
408 cycling intervals<sup>41</sup>. Furthermore, in the context of cycling, or alternating antibiotic treatments, consideration of the  
409 pharmacokinetics, *e.g.*, the time-varying antibiotic concentrations, was found to be important because the  
410 remaining concentration of the first antibiotic administered added to the total drug effect (illustrated in Fig. 3).  
411 Therefore, the antibiotic switch contributes to a higher total drug effect than after repeated administration of the  
412 same drug, even in the absence of collateral effects. In our simulations, the impact of this increased effect is  
413 dependent on the type of the antibiotic and was shown to be especially important for time-dependent antibiotics.  
414 This highlights the importance of considering both PK and PD when designing effective antibiotic treatments,  
415 something that is overlooked when drawing conclusion regarding treatments solely based on static *in vitro* models.  
416 To better characterize the population dynamics of pathogens in response to antibiotic treatment under presence of  
417 CS, we studied the effect of fitness costs of antibiotic resistance and mutation rates leading to antibiotic resistance.  
418 We find that introducing fitness costs had a negligible effect on PoR for the majority of the simulated CS-based  
419 treatments, with the exception of the three-day cycling using time dependent antibiotics (Fig. 8J and 8N), where  
420 introducing fitness costs improved the CS-based treatments by preventing resistant bacteria from reaching high  
421 densities before the first antibiotic switch. Typically, the PoR increased with mutation rate, which is in line with  
422 previous findings of mutator strains being associated with higher level of resistance<sup>42,43</sup>. For pathogens with a low  
423 mutation rate and/or administration of non-mutagenesis-inducing antibiotics ( $10^{-9}$  mut/bp/h), one-day cycling  
424 regimens and simultaneous antibiotic treatments are most relevant to benefit from CS, whereas for high mutation  
425 rates (*e.g.*,  $10^{-6}$  mut/bp/h), sequential and simultaneous antibiotic treatments are the most beneficial (Fig. 10). This

426 means that in situations when the occurrence of mutator strains is likely (*e.g.*, such as in cystic fibrosis lung  
427 infections<sup>44</sup>) and/or when the administered antibiotics induce mutagenesis (*e.g.*, fluoroquinolones<sup>45</sup>), this should be  
428 considered in the design of dosing schedules. With respect to the competition between different bacterial  
429 subpopulations occurring *in vivo*, we included a bacterial carrying capacity which introduces clonal competition.  
430 During clonal competition, competition between subpopulations can lead to their suppression, *e.g.*, high densities  
431 for one subpopulation can suppress the growth of a second subpopulation, even if the second population might be  
432 more fit. Treatments giving rise to clonal competition-based containment, where the selection pressure favors  
433 specific subpopulations which will in turn suppress others due to the capacity limitation of the system, have been  
434 suggested as a potential strategy to suppress AMR<sup>46</sup>. In our simulation, we observe a clear impact of clonal  
435 competition. When CS is present, single resistant subpopulations are unable to reach high enough levels to suppress  
436 the growth of the double resistant mutant, which allows the double mutant to take over, for some treatments. This  
437 support the value of characterizing CS-based treatments beyond the quantified summary metric of collateral effect.  
438 Our study advances the work by Udekwu and Weiss<sup>22</sup> by explicitly comparing treatment outcomes to a base  
439 scenario without CS to determine the specific contribution of CS effects, and by performing a more systematic  
440 analysis of key drug- and pathogen specific factors that could influence optimal CS-based treatment scenarios.  
441 Additionally, we incorporated mutations as random events to capture the stochastic nature of resistance evolution,  
442 which is overlooked when using purely deterministic models. Our mathematical model was designed to facilitate  
443 identification of the primary factors driving the success or failure of antibiotic treatments in a general setting, and  
444 not for specific antibiotics and/or pathogens. We thereby did not consider factors that could further contribute to  
445 treatment outcomes for specific pathogens or antibiotics. We did not consider that more complex evolutionary  
446 mutational trajectories can occur with associated complex patterns of changes in antibiotic sensitivity and MIC<sup>47</sup>,  
447 which are not easily definable to apply to antibiotic treatment in general. Other factors not considered include local  
448 antibiotic tissue concentrations<sup>48,49</sup>, pharmacokinetic drug-drug interactions or the contribution of the immune  
449 system. We expect that such factors will not affect the specific subpopulations studied in different ways and  
450 therefore will not have a great impact on the general findings derived in this analysis.

451 In this analysis we assumed independent additive drug effects, thus excluding the possibility of pharmacodynamic  
452 drug-drug interactions between antibiotics, *e.g.*, synergy or antagonism<sup>50</sup>. Combined drug effects can furthermore

453 be modelled according to different null interaction assumption, including: (i) dependence of drug effects through a  
454 shared mechanism of action (Loewe additivity)<sup>50,51</sup> [ref], (ii) independent drug effects with a shared maximum drug  
455 effect (Bliss independence)<sup>52</sup>, or (iii) fully independent additive drug effects<sup>50</sup> as implemented in this paper. The  
456 choice of null interaction model, or the presence of drug interactions (synergy, antagonism) may influence treatment  
457 outcomes in particular for simultaneous treatment schedules. Although an analysis of the effect of various possible  
458 drug interactions was beyond the scope of this analysis, we do expect this will be an important factor to consider  
459 when designing CS-based treatment for specific antibiotic combinations, where specific pharmacodynamic drug  
460 interactions can be explicitly incorporated.

461 The developed modelling framework is applicable for design of clinical treatment designs for specific antibiotic  
462 agents and pathogens, where the model can be further expanded with additional pathogen-, drug-, and patient-  
463 specific characteristics<sup>53</sup>, derived from separate experimental studies and by utilizing published clinical population PK  
464 models for specific antibiotics<sup>54,55</sup>, which include inter-individual variability or target site concentrations at the site of  
465 infection. This would thus allow us to derive tailored CS-based dosing regimens for specific antibiotics and  
466 pathogens. Additionally, we did not evaluate how the presence of collateral resistance (CR) could impact treatment  
467 efficacy. Although such scenarios are beyond the scope of the current study, the flexibility of our developed  
468 framework allows for the incorporation of CR, and could thus serve as a tool to investigate how CR impacts  
469 treatment efficacy. Furthermore, cellular hysteresis, where non-genetic CS-like responses have been observed, may  
470 be another direction for which our modelling framework could be extended<sup>41</sup>.

471 In this study we showcase how a mathematical modelling can address questions that are difficult to answer using an  
472 experimental approach. We conclude that CS-based treatments are likely to be able to contribute in the suppression  
473 of resistance. However, the success of such treatment strategies will be dependent on careful design of a dosing  
474 schedule, and requires explicit consideration of pathogen- and drug-specific characteristics. Our developed  
475 modelling framework delineates key factors for the overall design of effective CS-informed treatments and can be  
476 used to facilitating help the design of treatments tailored to specific pathogens and antibiotic combinations.  
477 Although well-conserved CS effects remain a key requirement, we found that reciprocal CS may not be a  
478 requirement to design such dosing schedules, expanding the applicability of CS-based treatments. Such CS-based

479 treatments appear to be most relevant for antibiotics with a narrow therapeutic window, which are also the  
480 antibiotics where within-host emergence of resistance is most likely to occur.

## 481 Acknowledgements

482 We wish to acknowledge Dr. Hadi Taghvafard for helpful mathematical input, Laura Zwep for valuable discussions,  
483 and Dr. Tingjie Guo for reviewing the model code. This work was funded by ZonMW Off Road (Project number  
484 451001033) and NWA Idea Generator (Project number NWA.1228.192.140). AL and DER were supported through  
485 the JPI-EC-AMR (Project 547001002).

## 486 Author contributions

487

488 L.B.S.A. and J.G.C.H. designed the study; L.B.S.A. performed the data analysis; L.B.S.A., J.G.C.H., A.L., D.R. supported  
489 interpretation of results; L.B.S.A., J.G.C.H., D.R., A.L., P.H.G. wrote the paper; J.G.C.H. conceived the project; All  
490 authors reviewed the paper

## 491 Competing interests

492 No competing interest to declare.

## 493 Code Availability

494

495 The model and associated code are available at <https://github.com/vanhasselmlab/CS-PKPD><sup>31</sup> and in Supplementary  
496 Software 1.

## 497 Data Availability

498

499 The data simulated in this study can be generated using the available scripts. The simulated data can also be  
500 provided by the corresponding authors upon request without restrictions.

## 501 References

502

- 503 1. Luepke, K. H. *et al.* Past, Present, and Future of Antibacterial Economics: Increasing Bacterial Resistance,  
504 Limited Antibiotic Pipeline, and Societal Implications. *Pharmacotherapy* (2017). doi:10.1002/phar.1868
- 505 2. Mcgrath, D. M. *et al.* Genetic Basis for In Vivo Daptomycin Resistance in Enterococci. *n engl j med* **365**, 892–  
506 900 (2011).

- 507 3. Mwangi, M. M. *et al.* Tracking the in vivo evolution of multidrug resistance in *Staphylococcus aureus* by whole-  
508 genome sequencing. *Proc. Natl. Acad. Sci. U. S. A.* **104**, 9451–9456 (2007).
- 509 4. Nielsen, E. I. & Friberg, L. E. Pharmacokinetic-pharmacodynamic modeling of antibacterial drugs. *Pharmacol.*  
510 *Rev.* **65**, 1053–1090 (2013).
- 511 5. Bonhoeffer, S., Lipsitch, M. & Levin, B. R. Evaluating treatment protocols to prevent antibiotic resistance. *Proc.*  
512 *Natl. Acad. Sci. U. S. A.* **94**, 12106–12111 (1997).
- 513 6. Baym, M., Stone, L. K. & Kishony, R. Multidrug evolutionary strategies to reverse antibiotic resistance. *Science*  
514 *(80- )*. **351**, aad3292–aad3292 (2016).
- 515 7. Imamovic, L. & Sommer, M. O. A. Use of collateral sensitivity networks to design drug cycling protocols that  
516 avoid resistance development. *Sci. Transl. Med.* **5**, 204ra132 (2013).
- 517 8. Lejla Imamovic, A. *et al.* Drug-Driven Phenotypic Convergence Supports Rational Treatment Strategies of  
518 Chronic Infections. *Cell* **172**, 121–134 (2018).
- 519 9. Podnecky, N. L. *et al.* Conserved collateral antibiotic susceptibility networks in diverse clinical strains of  
520 *Escherichia coli*. *Nat. Commun.* **9**, 3673 (2018).
- 521 10. Barbosa, C., Römhild, R., Rosenstiel, P. & Schulenburg, H. Evolutionary stability of collateral sensitivity to  
522 antibiotics in the model pathogen *Pseudomonas aeruginosa*. *Elife* **8**, 1–22 (2019).
- 523 11. Gonzales, P. R. *et al.* Synergistic, collaterally sensitive  $\beta$ -lactam combinations suppress resistance in MRSA. *Nat.*  
524 *Chem. Biol.* **11**, 855–861 (2015).
- 525 12. Imamovic, L. & Sommer, M. O. A. Use of collateral sensitivity networks to design drug cycling protocols that  
526 avoid resistance development. *Sci. Transl. Med.* **5**, (2013).
- 527 13. Barbosa, C. *et al.* Alternative Evolutionary Paths to Bacterial Antibiotic Resistance Cause Distinct Collateral  
528 Effects. *Mol. Biol. Evol.* **34**, 2229–2244 (2017).
- 529 14. Maltas, J. & Wood, K. B. Pervasive and diverse collateral sensitivity profiles inform optimal strategies to limit  
530 antibiotic resistance. *PLOS Biol.* **17**, e3000515 (2019).
- 531 15. Liakopoulos, A., Aulin, L. B. S., Buffoni, M., van Hasselt, J. G. C. & Rozen, D. E. Allele-specific collateral and fitness  
532 effects determine the dynamics of fluoroquinolone-resistance evolution. *bioRxiv* 2020.10.19.345058 (2020).  
533 doi:10.1101/2020.10.19.345058
- 534 16. Kim, S., Lieberman, T. D. & Kishony, R. Alternating antibiotic treatments constrain evolutionary paths to  
535 multidrug resistance. *Proc. Natl. Acad. Sci.* **111**, 14494–14499 (2014).
- 536 17. Regoes, R. R. *et al.* Pharmacodynamic Functions: a Multiparameter Approach to the Design of Antibiotic  
537 Treatment Regimens. *Antimicrob. Agents Chemother.* **48**, 3670–3676 (2004).
- 538 18. Coen Van Hasselt, J. G. & Iyengar, R. Systems pharmacology: Defining the interactions of drug combinations.  
539 *Annu. Rev. Pharmacol. Toxicol.* **59**, 21–40 (2019).
- 540 19. Yoshida, M. *et al.* Time-programmable drug dosing allows the manipulation, suppression and reversal of  
541 antibiotic drug resistance in vitro. *Nat. Commun.* **8**, 15589 (2017).
- 542 20. Maltas, J. & Wood, K. B. Pervasive and diverse collateral sensitivity profiles inform optimal strategies to limit  
543 antibiotic resistance. *PLOS Biol.* **17**, e3000515 (2019).
- 544 21. Nichol, D. *et al.* Antibiotic collateral sensitivity is contingent on the repeatability of evolution. *Nat. Commun.*  
545 **10**, 334 (2019).
- 546 22. Udekwu, K. I. & Weiss, H. Pharmacodynamic considerations of collateral sensitivity in design of antibiotic  
547 treatment regimen. *Drug Des. Devel. Ther.* **Volume 12**, 2249–2257 (2018).
- 548 23. Sharma, R. & Sharma, S. Physiology , Blood Volume. *StatPearls* **1**, 6–9 (2020).

- 549 24. Gerlini, A. *et al.* The Role of Host and Microbial Factors in the Pathogenesis of Pneumococcal Bacteraemia  
550 Arising from a Single Bacterial Cell Bottleneck. **10**, (2014).
- 551 25. Martínez, J. L. & Baquero, F. Mutation Frequencies and Antibiotic Resistance. *Antimicrob. Agents Chemother.*  
552 **44**, 1771–1777 (2000).
- 553 26. Angst, D. C., Tepekule, B., Sun, L., Bogos, B. & Bonhoeffer, S. Comparing treatment strategies to reduce  
554 antibiotic resistance in an in vitro epidemiological setting. *Proc. Natl. Acad. Sci. U. S. A.* **118**, 1–7 (2021).
- 555 27. Tepekule, B., Uecker, H., Derungs, I., Frenoy, A. & Bonhoeffer, S. Modeling antibiotic treatment in hospitals: A  
556 systematic approach shows benefits of combination therapy over cycling, mixing, and mono-drug therapies.  
557 *PLoS Comput. Biol.* **13**, 1–22 (2017).
- 558 28. van Duijn, P. J. *et al.* The effects of antibiotic cycling and mixing on antibiotic resistance in intensive care units:  
559 a cluster-randomised crossover trial. *Lancet Infect. Dis.* **18**, 401–409 (2018).
- 560 29. Wang, W., Hallow, K. M. & James, D. A. A Tutorial on RxODE : Simulating Differential Equation Pharmacometric  
561 Models in R. 3–10 (2016). doi:10.1002/psp4.12052
- 562 30. Fidler M, Hallow M, Wilkins J, W. W. RxODE: Facilities for Simulating from ODE-Based Models. R package version  
563 1.0.6. (2021).
- 564 31. Aulin, L. B. S. Design principles of collateral sensitivity-based dosing strategies. (2021).  
565 doi:10.5281/zenodo.5410785
- 566 32. Podnecky, N. L. *et al.* Conserved collateral antibiotic susceptibility networks in diverse clinical strains of  
567 *Escherichia coli*. *Nat. Commun.* **9**, 3673 (2018).
- 568 33. Sommer, M. & Imamovic, L. Use of collateral sensitivity networks to design drug cycling protocols that avoid  
569 resistance development. *Sci. Transl. Med.* **5**, 204ra132 (2013).
- 570 34. Falagas, M. E. & Kasiakou, S. K. Toxicity of polymyxins: A systematic review of the evidence from old and recent  
571 studies. *Crit. Care* **10**, (2006).
- 572 35. Mattie, H., Craig, W. A. & Pechere, J. C. Determinants of efficacy and toxicity of aminoglycosides. *J. Antibiot.*  
573 (Tokyo). **24**, 281–293 (1989).
- 574 36. Zasowski, E. J. *et al.* Identification of vancomycin exposure-toxicity thresholds in hospitalized patients receiving  
575 intravenous vancomycin. *Antimicrob. Agents Chemother.* **62**, e01684-17 (2018).
- 576 37. Andersson, D. I. & Hughes, D. Antibiotic resistance and its cost : is it possible to reverse resistance ? *Nat. Rev.*  
577 *Microbiol.* **8**, (2010).
- 578 38. Band, V. I. *et al.* Antibiotic failure mediated by a resistant subpopulation in *Enterobacter cloacae*. *Nat.*  
579 *Microbiol.* **1**, 16053 (2016).
- 580 39. Long, H. *et al.* Antibiotic treatment enhances the genome-wide mutation rate of target cells. *Proc. Natl. Acad.*  
581 *Sci.* **113**, E2498–E2505 (2016).
- 582 40. Nichol, D. *et al.* Steering Evolution with Sequential Therapy to Prevent the Emergence of Bacterial Antibiotic  
583 Resistance. *PLOS Comput. Biol.* **11**, e1004493 (2015).
- 584 41. Roemhild, R. *et al.* Cellular hysteresis as a principle to maximize the efficacy of antibiotic therapy. *Proc. Natl.*  
585 *Acad. Sci. U. S. A.* **115**, 9767–9772 (2018).
- 586 42. Chopra, I., O'Neill, A. J. & Miller, K. The role of mutators in the emergence of antibiotic-resistant bacteria. *Drug*  
587 *Resist. Updat.* **6**, 137–145 (2003).
- 588 43. Dai, L., Sahin, O., Tang, Y. & Zhang, Q. A mutator phenotype promoting the emergence of spontaneous oxidative  
589 stress-resistant mutants in *Campylobacter jejuni*. *Appl. Environ. Microbiol.* **83**, 1–13 (2017).
- 590 44. Looft, C. *et al.* High Frequency of Hypermutable *Pseudomonas aeruginosa* in Cystic Fibrosis Lung Infection.  
591 *Science (80- )*. **288**, 1251–1254 (2000).

- 592 45. Long, H. *et al.* Antibiotic treatment enhances the genome-wide mutation rate of target cells. *Proc. Natl. Acad. Sci.* **113**, E2498 LP-E2505 (2016).  
593
- 594 46. Hansen, E., Woods, R. J. & Read, A. F. How to Use a Chemotherapeutic Agent When Resistance to It Threatens  
595 the Patient. *PLoS Biol.* **15**, 1–21 (2017).
- 596 47. Aulin, L. B. S. *et al.* Distinct evolution of colistin resistance associated with experimental resistance evolution  
597 models in *Klebsiella pneumoniae*. *J. Antimicrob. Chemother.* **76**, 533–535 (2021).
- 598 48. Väliälto, P. A. J. *et al.* Structure-Based Prediction of Anti-infective Drug Concentrations in the Human Lung  
599 Epithelial Lining Fluid. *Pharm. Res.* **33**, 856–867 (2016).
- 600 49. Aulin, L. B. S. *et al.* Validation of a Model Predicting Anti-infective Lung Penetration in the Epithelial Lining Fluid  
601 of Humans. *Pharm. Res.* **35**, 26 (2018).
- 602 50. Boucher, A. N. & Tam, V. H. Mathematical formulation of additivity for antimicrobial agents. *Diagn. Microbiol.*  
603 *Infect. Dis.* **55**, 319–325 (2006).
- 604 51. Loewe, S. Die quantitativen Probleme der Pharmakologie. *Ergebnisse der Physiol.* **27**, 47–187 (1928).
- 605 52. Bliss, C. I. The Toxicity of Poisons Applied Jointly. *Ann. Appl. Biol.* **26**, 585–615 (1939).
- 606 53. Aulin, L. B. S. *et al.* Biomarker-Guided Individualization of Antibiotic Therapy. *Clin. Pharmacol. Ther.* **0**, cpt.2194  
607 (2021).
- 608 54. Aulin, L. B. S. *et al.* Population Pharmacokinetics of Unbound and Total Teicoplanin in Critically Ill Pediatric  
609 Patients. *Clin. Pharmacokinet.* **60**, 353–363 (2021).
- 610 55. Cock, P. A. J. G. De *et al.* Population pharmacokinetics of cefazolin before , during and after cardiopulmonary  
611 bypass to optimize dosing regimens for children undergoing cardiac surgery. *J. Antimicrob. Chemother.* **72**, 791–  
612 800 (2017).
- 613 56. Pál, C., Papp, B. & Lázár, V. Collateral sensitivity of antibiotic-resistant microbes. *Trends Microbiol.* **23**, 401–407  
614 (2015).

## 615 Figure captions

616

617 Figure 1. **Concept figure of collateral sensitivity (CS)-based treatments using two hypothetical drugs, antibiotic A and B, based on Pál et al**  
618 **2015**<sup>56</sup> **A:** Reciprocal CS relationship between antibiotic A and B. **B:** Theoretical cycling regimen exploiting CS between antibiotic A and B to  
619 suppress resistance.

620 Figure 2. **Simulation workflow. Pharmacokinetic-pharmacodynamic (PK-PD) framework comprised of four bacterial subpopulations (WT, R<sub>A</sub>,**  
621 **R<sub>B</sub>, R<sub>AB</sub>) and the PK-PD of two hypothetical drugs (D<sub>A</sub> and D<sub>B</sub>).** The framework includes fixed infection- and pathogen-specific parameters and  
622 fixed drug PK parameters. The model input includes both drug- and pathogen-related factors, which vary between different scenarios. The  
623 framework was used to simulate different treatment schedules of two-week multi-drug treatments using D<sub>A</sub> and D<sub>B</sub> for n patients. In the  
624 example a three-day cycling treatment regimen (PK panel) is simulated for six patients. The resulting patient-specific bacterial profiles are  
625 shown in the PD panel. Resistance was evaluated for each patient and bacterial subpopulation at the end of treatment (EoT), for which the  
626 corresponding probability of resistance (PoR) was calculated.

627 Figure 3. **MIC-specific PK-PD relationships. A:** Initial pharmacokinetic (PK) profiles of mono or multi-drug treatments using two hypothetical  
628 antibiotics D<sub>A</sub> (turquoise) and D<sub>B</sub> (purple) where both drugs follow one-compartmental kinetics with first order elimination. The drugs were  
629 administered intravenously twice daily according to four different treatment schedules (columns), including non-reparative sequential

630 administration, repetitive cycling administration, and simulations administration. Dosages used were related to average steady state  
631 concentration of 1.5 mg/L ( $1.5 \times \text{MIC}_{\text{WT}}$ ) or 0.75mg/L ( $0.75 \times \text{MIC}_{\text{WT}}$ ) for simultaneous dosing. **B:** Pharmacodynamic profiles related to different  
632 treatment schedules using different antibiotic drug types including concentration- (Hill = 3, red) or time- (Hill = 0.5, blue) dependent antibiotics  
633 and bactericidal ( $G_{\text{min}} = -3$ , solid) and bacteriostatic ( $G_{\text{min}} = -1$ , dashed), where the effect is representing the proportional bacterial growth  
634 inhibition/killing of different bacterial phenotypes (rows). The bacterial phenotypes are associated with different sensitivities towards  $D_A$  and  
635  $D_B$ . The effect is driven by the PK profile shown in panel A according to Equation 9 and 10.

636 **Figure 4. The effect of treatment design and antibiotic in relation to different levels of collateral sensitivity (CS) on the probability of**  
637 **resistance (PoR) at end of treatment.** The simulations show that CS had a profound impact on resistance development for treatments with  
638 concentration dependent antibiotics with one-day cycling interval or simultaneous administration. **A-P:** PoR was estimated at end of treatment  
639 for treatments using different designs (columns) and antibiotic types (rows), where each simulated scenario was realized 500 times.  
640 Subpopulation-specific PoR are indicated by different colour and  $R_{\text{Any}}$ , defined as the presence of any resistant subpopulation, is indicated in  
641 grey. Data are presented as mean PoR with the error bars represent the standard error of the estimation. **Q:** Bacterial dynamics relating to  
642 different treatment schedules using concentration-dependent bacteriostatic drugs, where each simulation was realized  $n=500$  times.  
643 Subpopulation-specific bacterial density are indicated by different colours, where the solid lines indicate the median and the shaded area  
644 covers the 5<sup>th</sup>-95<sup>th</sup> percentiles of the predictions. The resistance cut-off (dashed line) is used for end of treatment evaluation of resistance.

645 **Figure 5. The effect of the direction or reciprocally of collateral sensitivity (CS) on end of treatment probability of resistance (PoR). PoR was**  
646 **estimated at end of treatment for different CS scenarios using concentration dependent bacteriostatic drugs.** Subpopulation-specific PoR is  
647 indicated by different colour and  $R_{\text{Any}}$  resistance, defined as the presence of any resistant subpopulation, is indicated in grey. Each simulated  
648 scenario was realized  $n=500$  times. Data are presented as mean PoR with the error bars represent the standard error of the estimation. For the  
649 one-day cycling regimen it became evident that the CS towards the second administrated drug ( $D_B$ ) was driving the effect, CS-based dosing  
650 using simulations administration of concentration dependent antibiotics showed that reciprocity is necessary to suppress overall resistance.

651 **Figure 6. The effect of using different antibiotic types during one-day cycling multi-drug treatments in relation to different levels of**  
652 **collateral sensitivity (CS) on the probability of resistance (PoR) at the end of treatment.** The simulations showed that initiating treatment  
653 with a time-dependent antibiotic was more effective in suppressing resistance than with a concentration-dependent antibiotic in the presence  
654 of reciprocal CS. Each simulated scenario was realized  $n=500$  times. PoR was estimated at the end of treatment for one-day cycling regimen  
655 with different antibiotic combinations. Subpopulation-specific PoR is indicated by different colour and  $R_{\text{Any}}$ , defined as the presence of any  
656 resistant subpopulation, is indicated in grey. Data are presented as mean PoR with the error bars represent the standard error of the  
657 estimation.

658 **Figure 7. The effect of antibiotic steady state concentrations ( $C_{\text{ss}}$ ) in relation to different levels of collateral sensitivity (CS) on the probability**  
659 **of resistance at the end of treatment (PoR).** The simulation revealed that CS had the largest impact on PoR for  $C_{\text{ss}}$  close to MIC of the wild type  
660 strain ( $\text{MIC}_{\text{WT}}$ ).  $C_{\text{ss}}$  was expressed as factor difference from the  $\text{MIC}_{\text{WT}}$ . For the dosing regimen using simultaneous administrated antibiotics the  
661  $C_{\text{ss}}$  represent the total antibiotic  $C_{\text{ss}}$ , where the individual antibiotics were dosed at  $0.5 \times C_{\text{ss}}$ . PoR of  $R_{\text{Any}}$ , defined as the presence of any



662 resistant subpopulation, was estimated at the end of treatment for treatments using different designs (columns) and antibiotic types (rows).  
663 Each simulated scenario was realized  $n=500$  times. Colour and line-type indicate the magnitude of reciprocal CS simulated. Data are presented  
664 as mean PoR with the error bars represent the standard error of the estimation..

665 **Figure 8. The effect of fitness costs for developing resistance for different levels of collateral sensitivity effects on the probability of**  
666 **resistance (PoR).** PoR of  $R_{Any}$ , defined as the presence of any resistant subpopulation, was estimated at end of treatment for treatments using  
667 different designs (columns) and antibiotic types (rows). Colour and line-type indicate the magnitude of reciprocal CS simulated. Each simulated  
668 scenario was realized  $n=500$  times. Data are presented as mean PoR with the error bars represent the standard error of the estimation.

669 **Figure 9. The effect of pre-existing resistant mutants for different magnitudes of collateral sensitivity on the probability of resistance (PoR).**  
670 **PoR was estimated at the end of treatment for different scenarios of low levels of pre-existing resistance (columns) and antibiotic types**  
671 **(rows).** Subpopulation-specific probability of resistance is indicated by colour and PoR of  $R_{Any}$ , defined as the presence of any resistant  
672 subpopulation, is indicated in grey. Each simulated scenario was realized  $n=500$  times. Data are presented as mean PoR with the error bars  
673 represent the standard error of the estimation.

674 **Figure 10. The effect of increased mutation rate for different CS magnitudes on the probability of resistance (PoR). The combined impact of**  
675 **mutation rate and the CS on PoR was dependent on treatment schedule.** PoR of  $R_{Any}$ , defined as the presence of any resistant subpopulation,  
676 was estimated at the end of treatment for treatments using different designs (columns) and antibiotic types (rows) for different mutation rates  
677 (x-axis). Each simulated scenario was realized  $n=500$  times. Colour and line-type indicate the magnitude of reciprocal CS simulated. Data are  
678 presented as mean PoR with the error bars represent the standard error of the estimation.

679

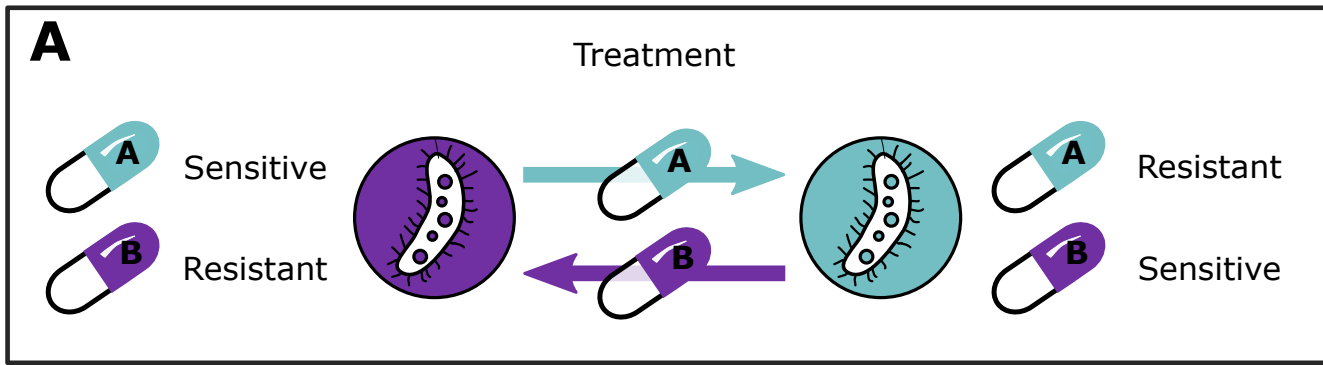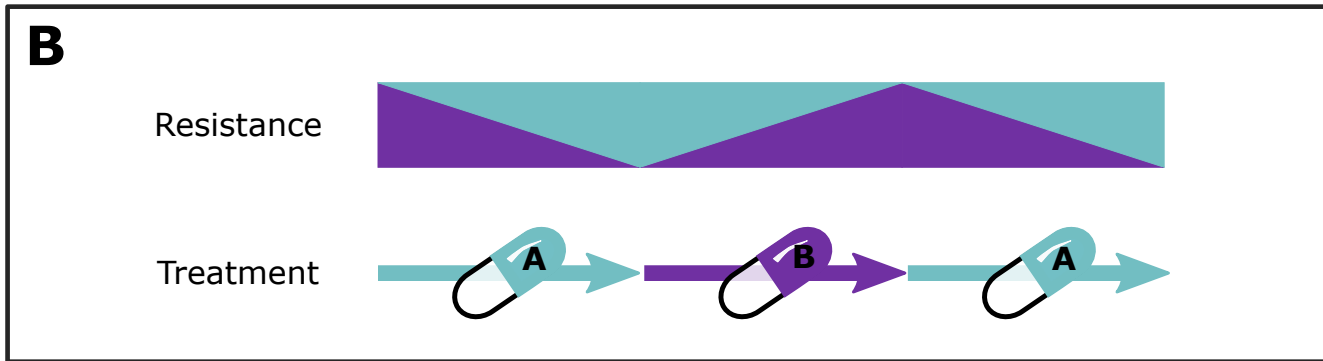

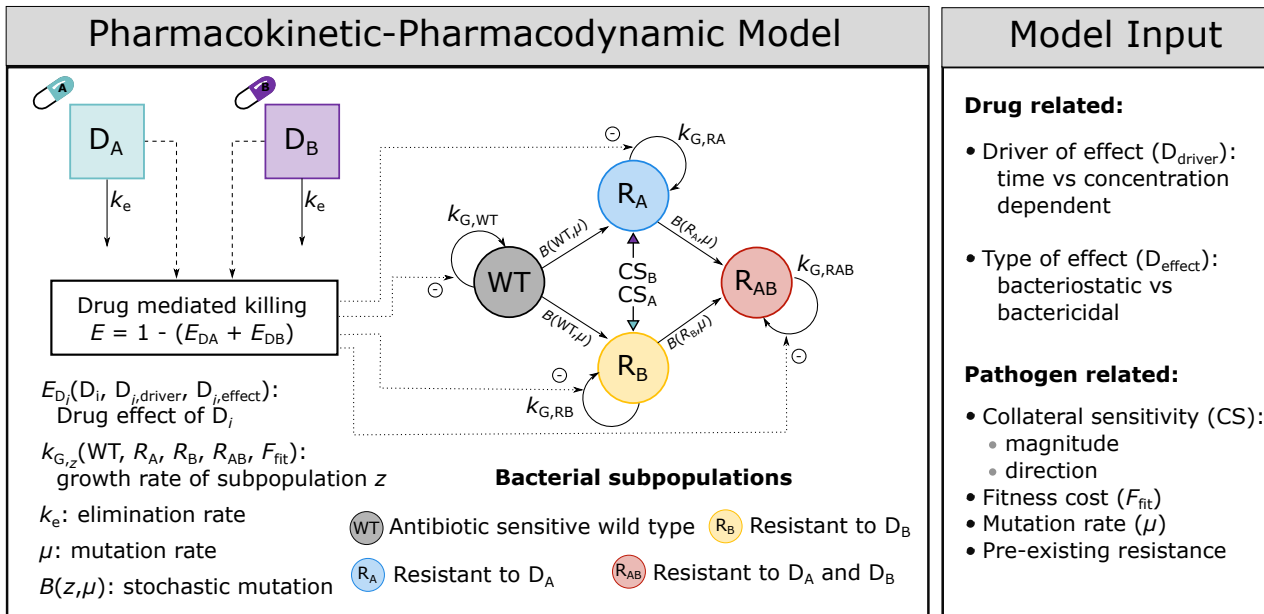

## Treatment Simulations

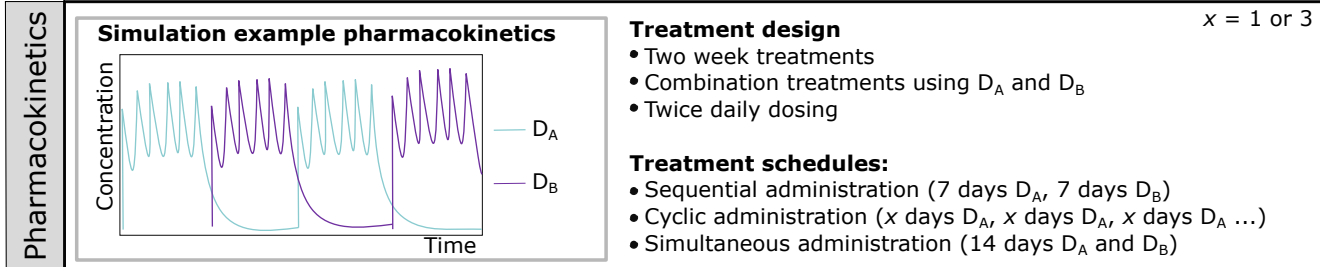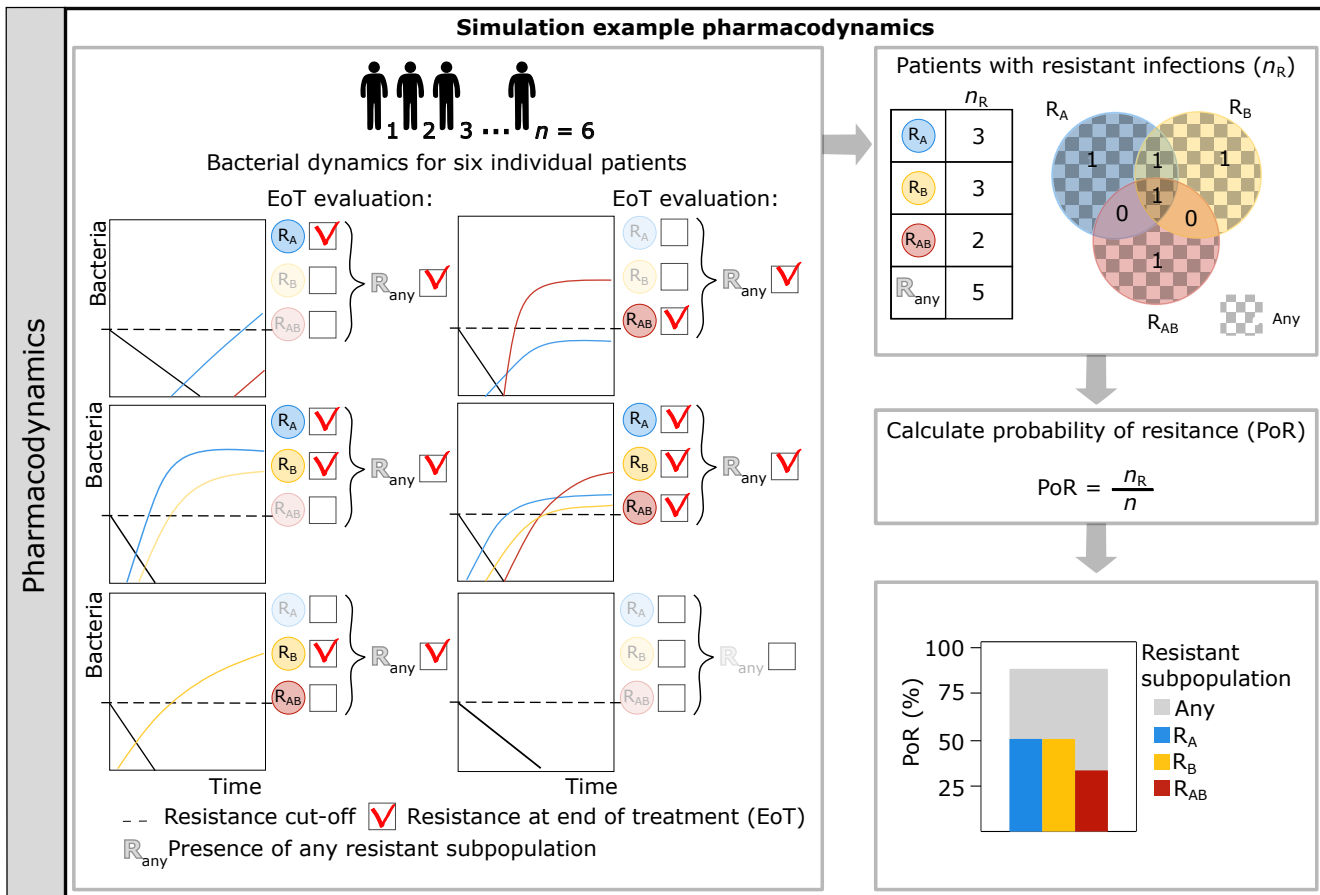

**A**

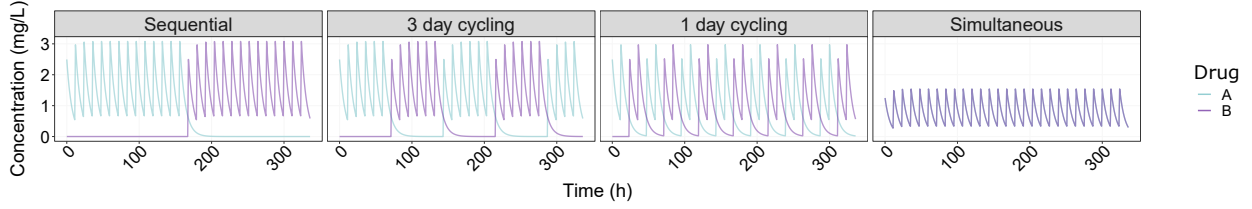

**B**

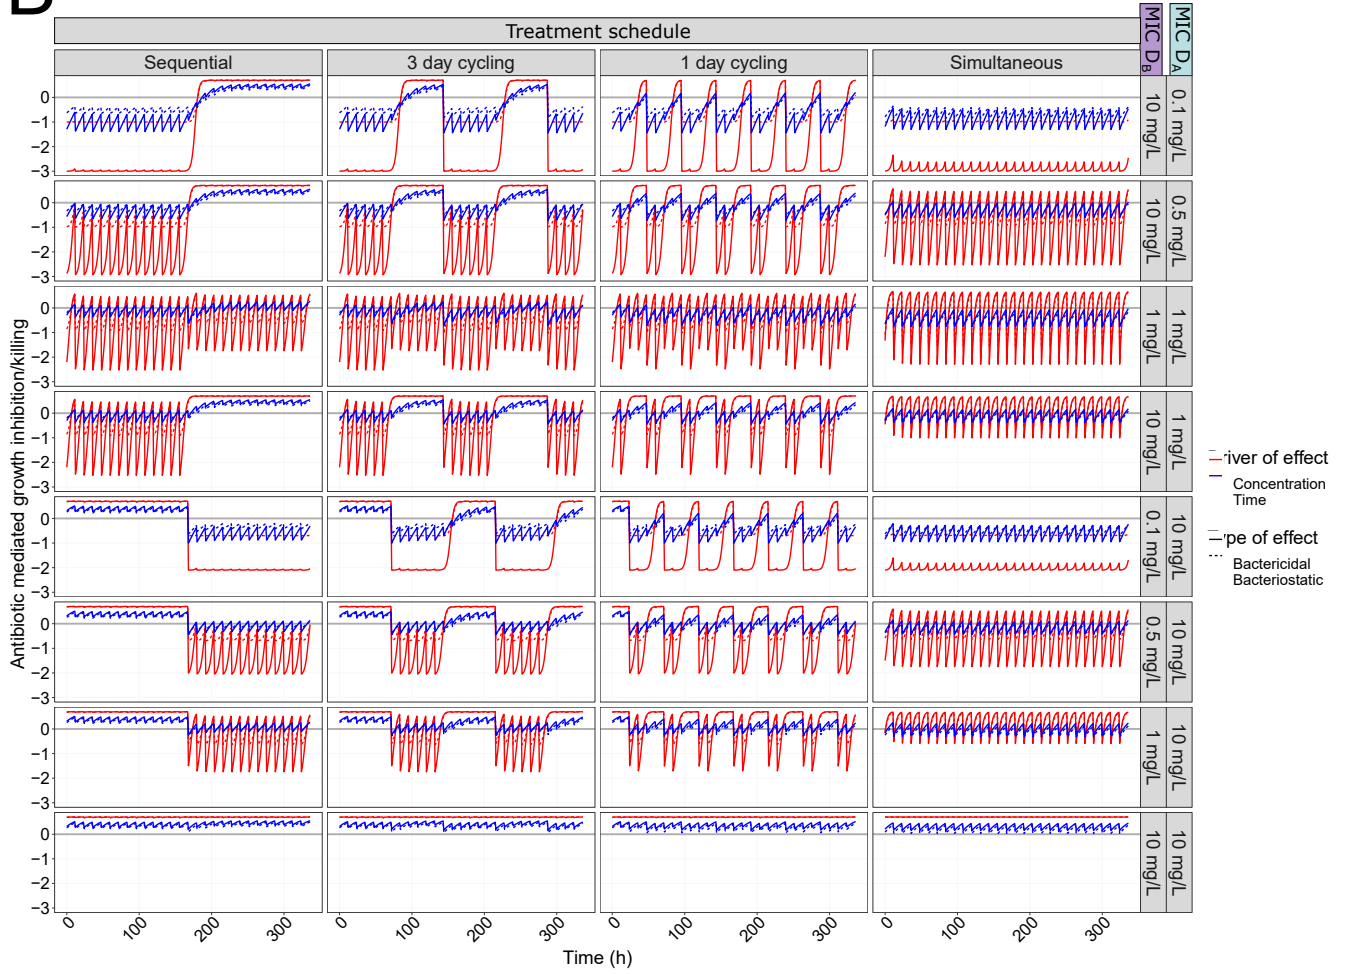

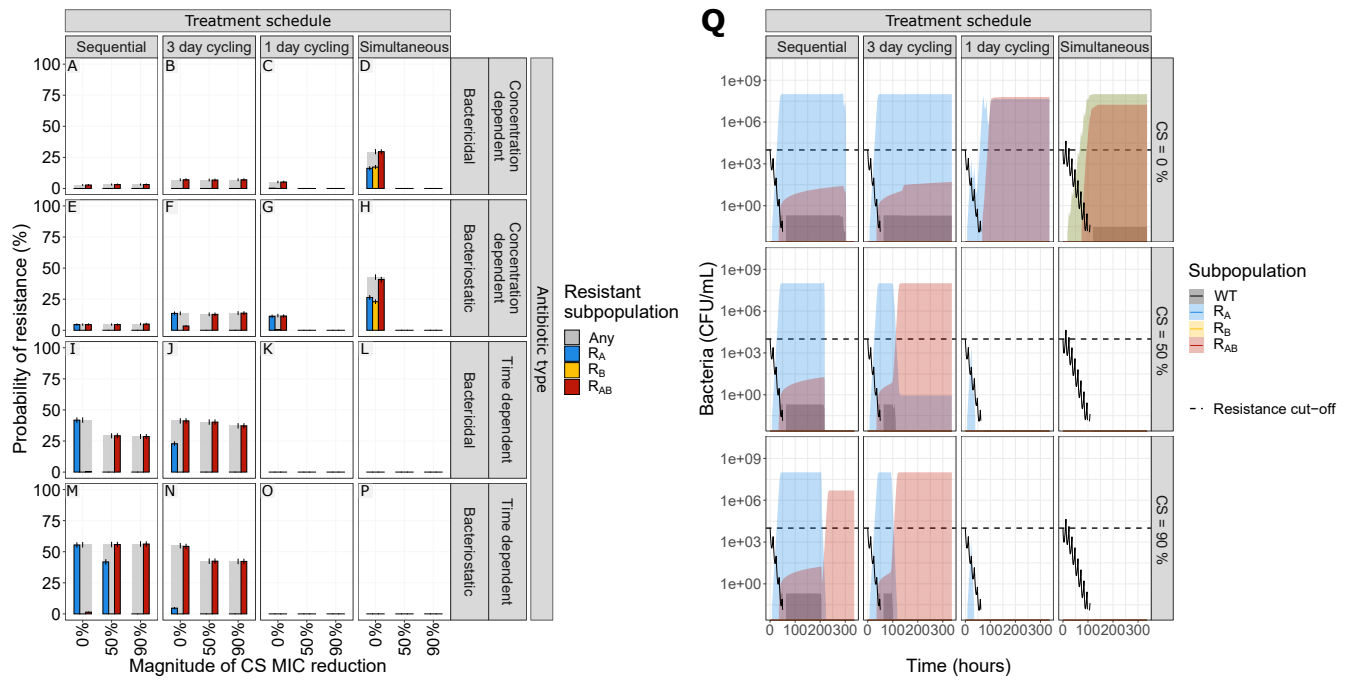

# Figure 5

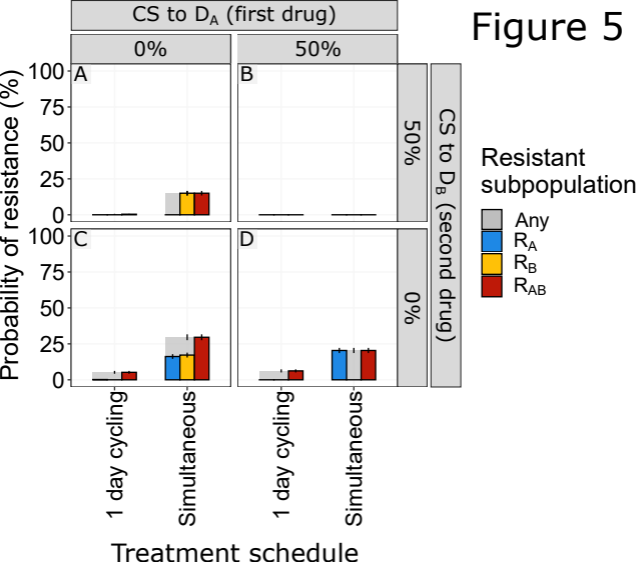

# Figure 6

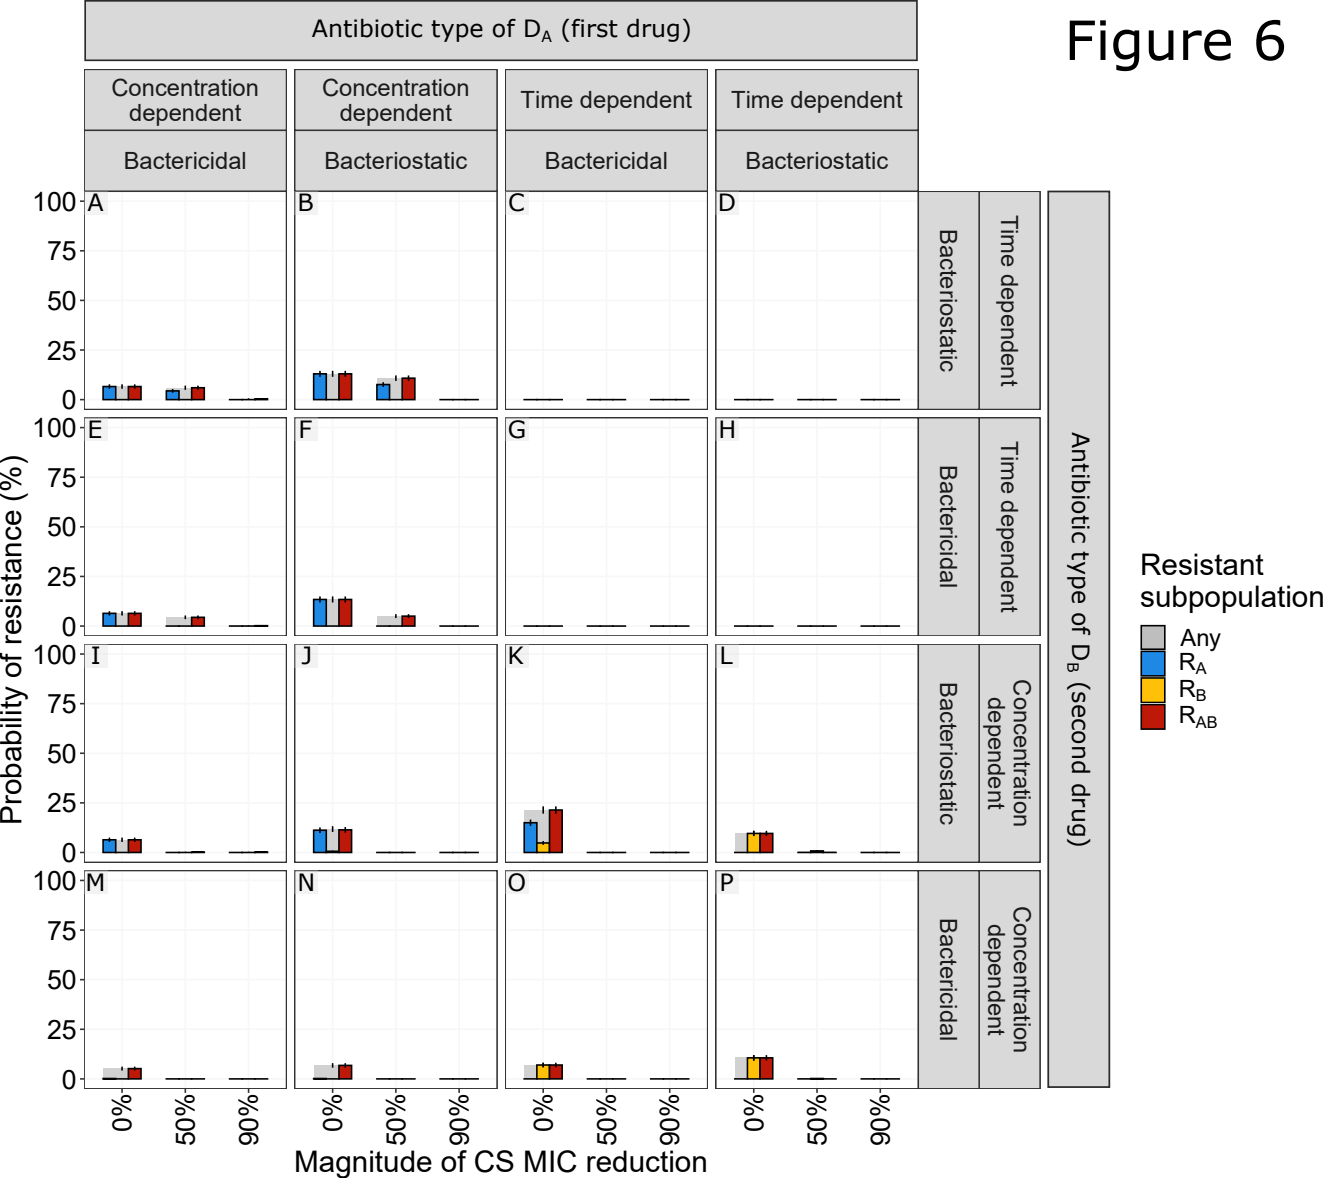

# Figure 7

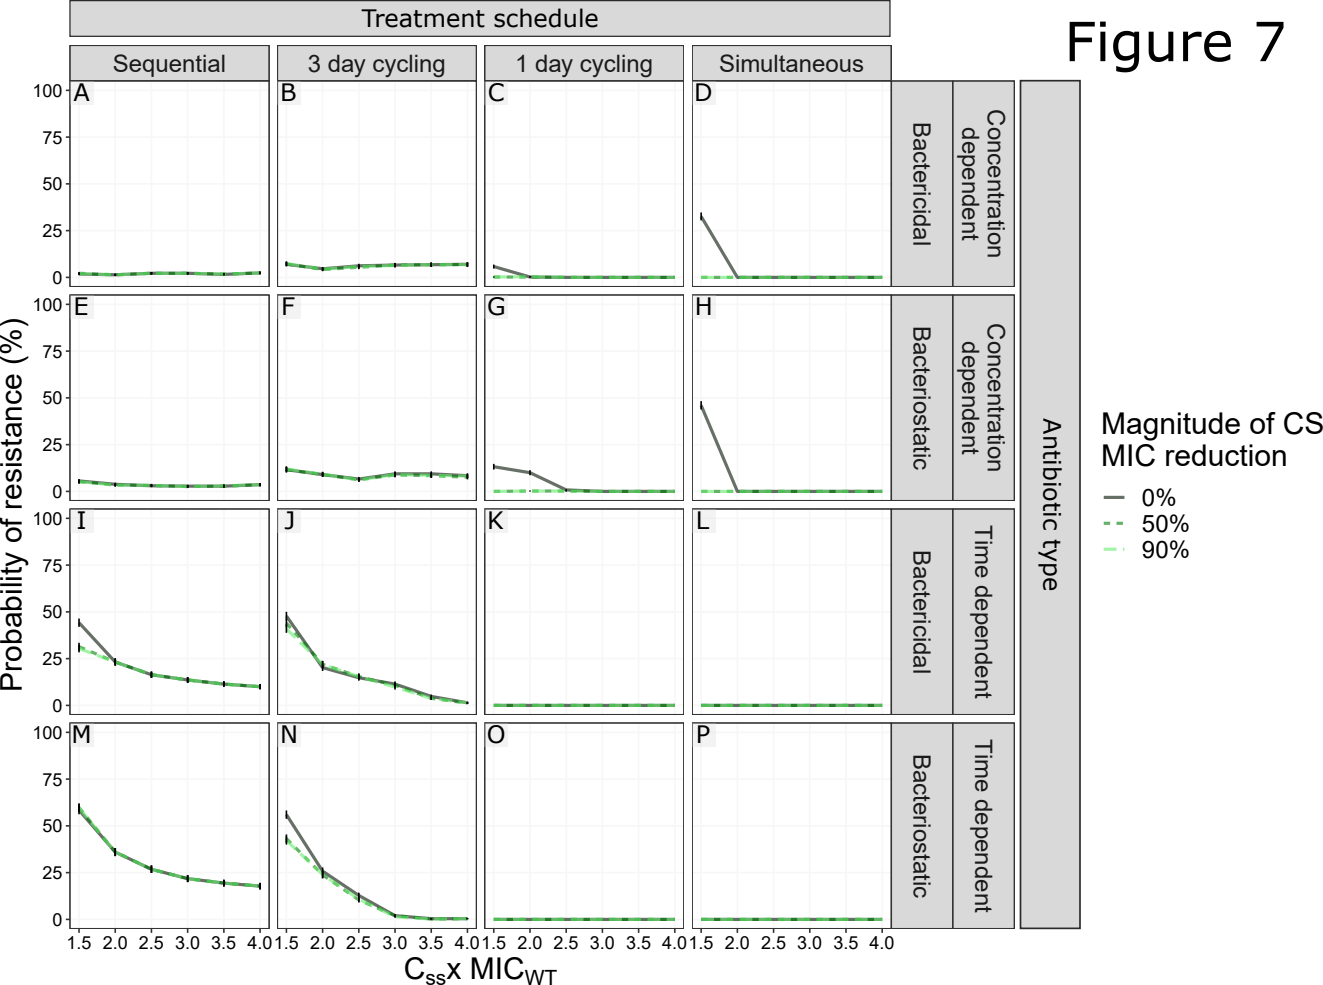



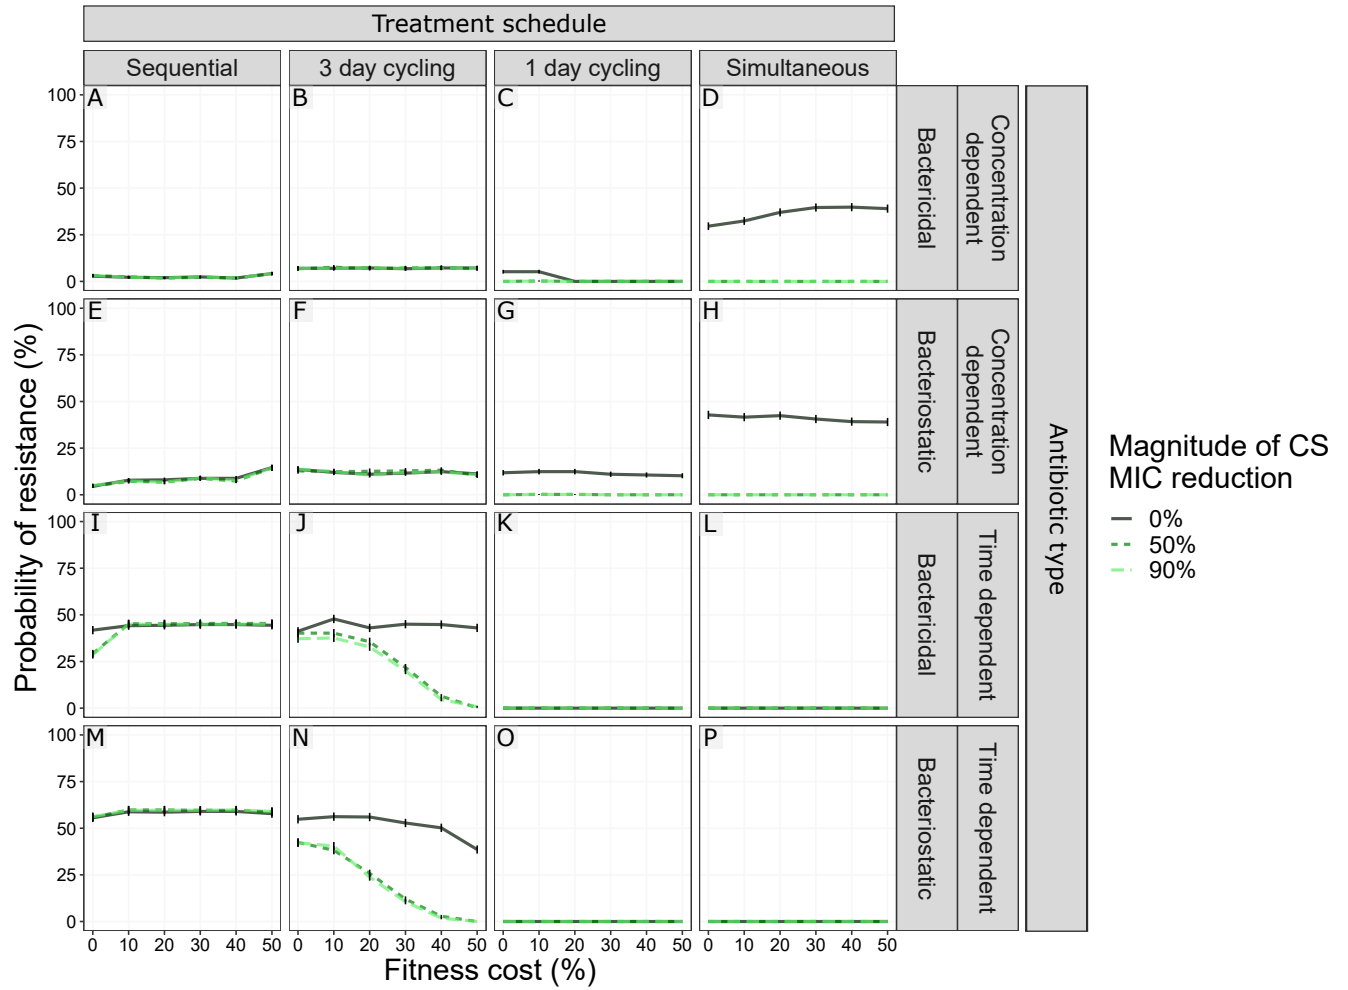

# Figure 9

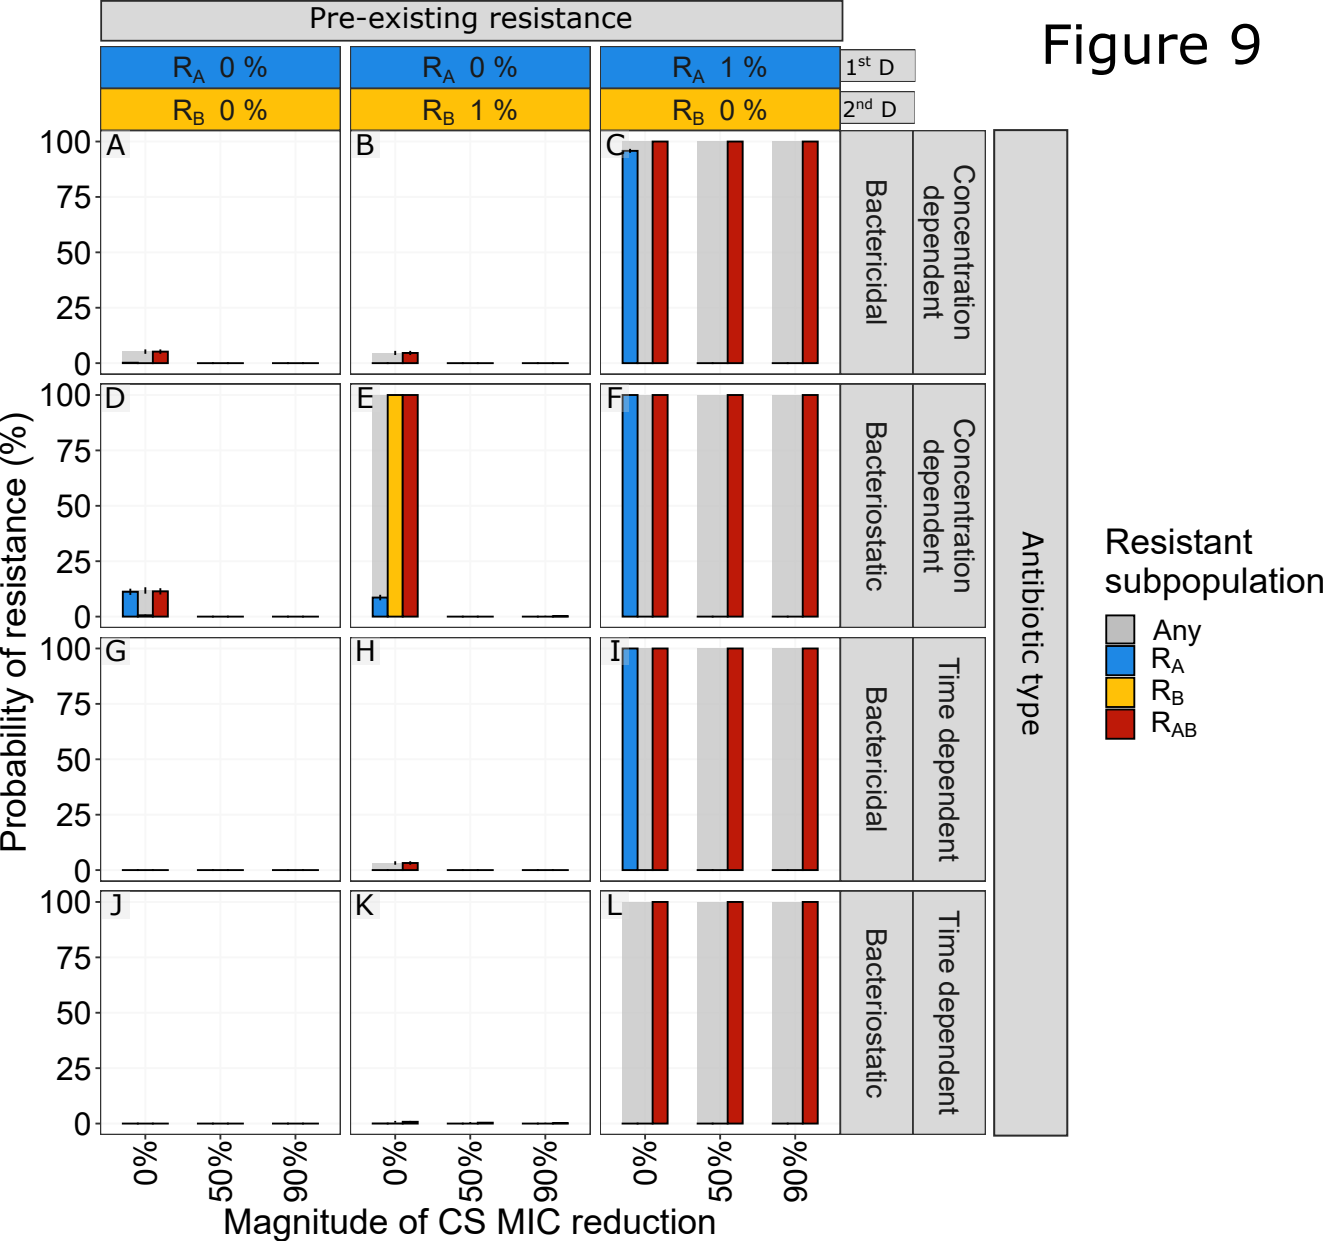

# Figure 10

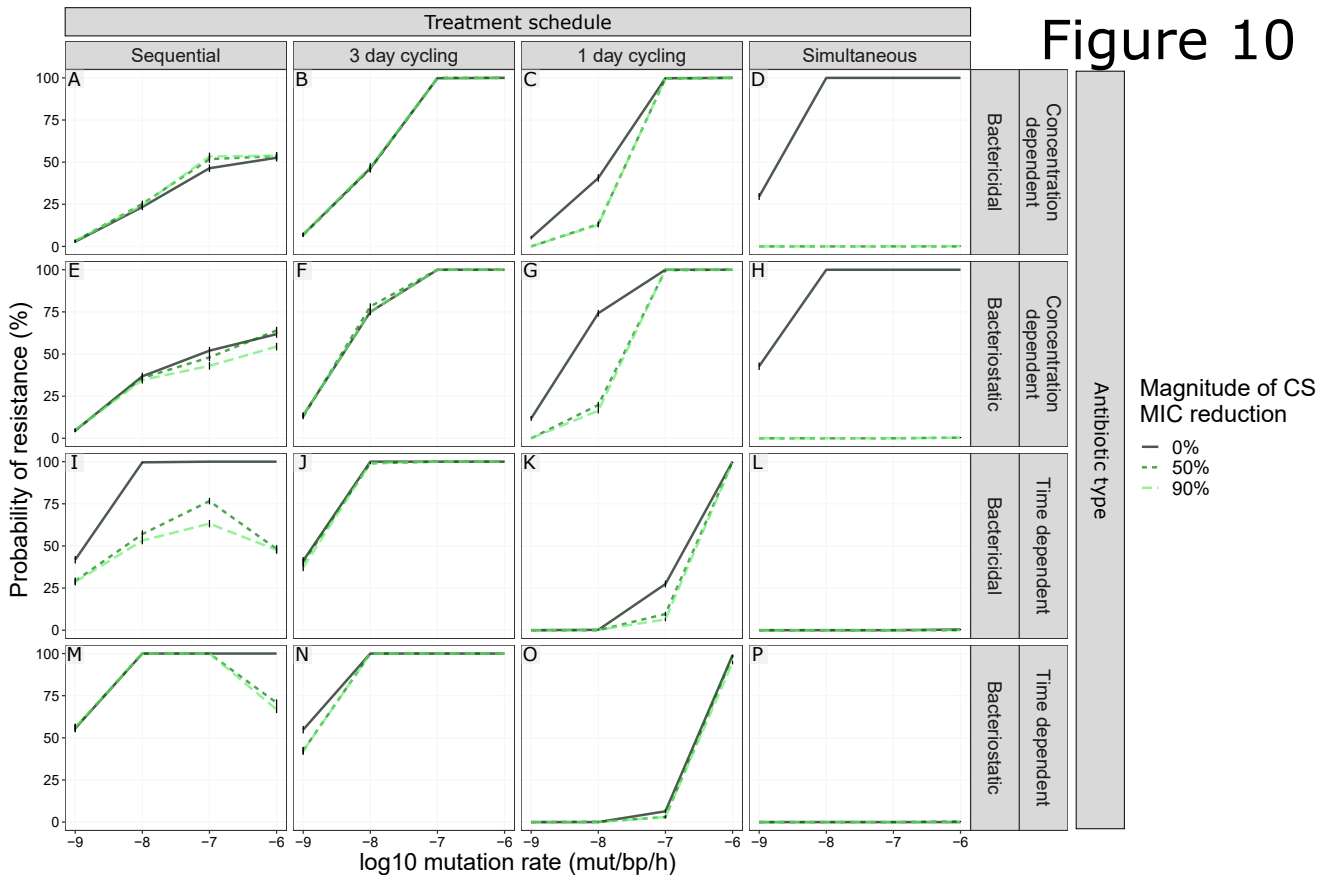

Source: https://www.biorxiv.org/content/10.1101/2021.03.31.437927v3.full.pdf
